# Supplementary material for: Computational and experimental comparison of diphosphane and diene ligands in the Rh-catalysed carboxylation of organoboron compounds with CO2
Source: Royal Society of Chemistry journal article supplement (doi:10.1039/c4gc00243a), 2014-01-01

# Computational and experimental comparison of diphosphane and diene ligands in the Rh-catalysed carboxylation of organoboron compounds with CO<sub>2</sub>

Hua-Li Qin,<sup>\*a</sup> Jia-Bin Han,<sup>a</sup> Jian-Hong Hao,<sup>a</sup> and Eric Assen B. Kantchev<sup>\*a,b</sup>

<sup>a</sup> Department of Pharmaceutical Engineering, School of Chemical Engineering, Wuhan University of Technology, 205 Luoshi Road, Wuhan, 430070, P. R. China.

<sup>b</sup> Institute of Materials Research and Engineering, 3 Research Link, Singapore 117602.

## Computational results

CO<sub>2</sub>

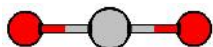

---

| Center Number | Atomic Number | Atomic Type | Coordinates (Angstroms) |          |           |
|---------------|---------------|-------------|-------------------------|----------|-----------|
|               |               |             | X                       | Y        | Z         |
| 1             | 8             | 0           | 0.000000                | 0.000000 | 1.167248  |
| 2             | 6             | 0           | 0.000000                | 0.000000 | 0.000000  |
| 3             | 8             | 0           | 0.000000                | 0.000000 | -1.167248 |

---

SCF Done: E(RPBE1PBE) = -188.412243201 A.U. after 1 cycles  
Convg = 0.4939D-09 -V/T = 2.0120  
Zero-point correction= 0.011837 (Hartree/Particle)  
Thermal correction to Energy= 0.014844  
Thermal correction to Enthalpy= 0.015899  
Thermal correction to Gibbs Free Energy= -0.011742  
Sum of electronic and zero-point Energies= -188.400407  
Sum of electronic and thermal Energies= -188.397400  
Sum of electronic and thermal Enthalpies= -188.396344  
Sum of electronic and thermal Free Energies= -188.423985

|                |          |          |           |
|----------------|----------|----------|-----------|
|                | 1        | 2        | 3         |
|                | PIU      | PIU      | SGG       |
| Frequencies -- | 673.7536 | 673.7536 | 1393.8676 |

## DPPP-Rh catalyst

*syn-pathway*

DPPP-Rh-Ph (3)

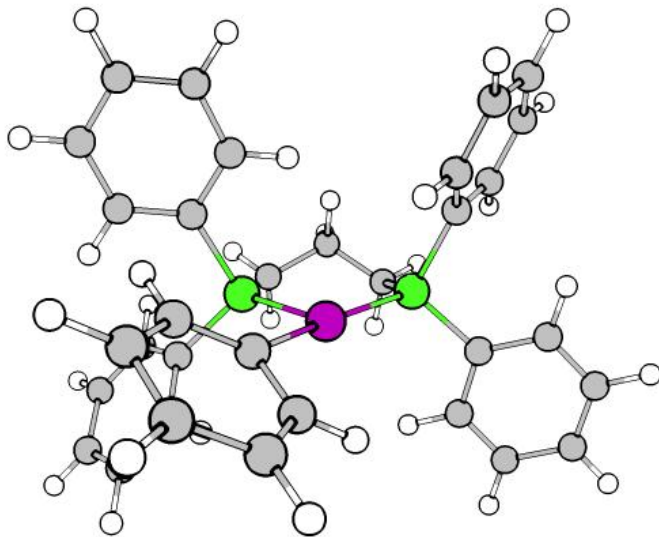

---

| Center Number | Atomic Number | Atomic Type | Coordinates (Angstroms) |           |           |
|---------------|---------------|-------------|-------------------------|-----------|-----------|
|               |               |             | X                       | Y         | Z         |
| 1             | 45            | 0           | 0.061688                | -0.470838 | 0.653116  |
| 2             | 15            | 0           | -1.347048               | 0.155730  | -0.929109 |
| 3             | 15            | 0           | 2.037434                | -0.088980 | -0.557995 |
| 4             | 6             | 0           | 1.862271                | 0.150579  | -2.378284 |
| 5             | 6             | 0           | -0.667347               | 0.487018  | -2.634107 |
| 6             | 1             | 0           | 1.666351                | -0.837719 | -2.809514 |

---

|    |   |   |           |           |           |
|----|---|---|-----------|-----------|-----------|
| 7  | 1 | 0 | 2.808320  | 0.494786  | -2.807638 |
| 8  | 6 | 0 | 3.306596  | -1.418762 | -0.477510 |
| 9  | 6 | 0 | 2.903545  | -2.707208 | -0.859775 |
| 10 | 6 | 0 | 4.612191  | -1.232815 | -0.011411 |
| 11 | 6 | 0 | 3.795072  | -3.774883 | -0.811061 |
| 12 | 1 | 0 | 1.878310  | -2.877678 | -1.184369 |
| 13 | 6 | 0 | 5.501278  | -2.306643 | 0.049855  |
| 14 | 1 | 0 | 4.941274  | -0.249222 | 0.312373  |
| 15 | 6 | 0 | 5.099378  | -3.577166 | -0.355654 |
| 16 | 1 | 0 | 3.467520  | -4.765347 | -1.116507 |
| 17 | 1 | 0 | 6.511798  | -2.146166 | 0.417171  |
| 18 | 1 | 0 | 5.794105  | -4.411634 | -0.308653 |
| 19 | 6 | 0 | 2.940170  | 1.424417  | -0.028792 |
| 20 | 6 | 0 | 3.951580  | 2.036242  | -0.781838 |
| 21 | 6 | 0 | 2.585194  | 1.992354  | 1.201171  |
| 22 | 6 | 0 | 4.588431  | 3.184802  | -0.316549 |
| 23 | 1 | 0 | 4.258913  | 1.616914  | -1.736478 |
| 24 | 6 | 0 | 3.225943  | 3.137444  | 1.672516  |
| 25 | 1 | 0 | 1.788955  | 1.537122  | 1.788086  |
| 26 | 6 | 0 | 4.228078  | 3.737407  | 0.912717  |
| 27 | 1 | 0 | 5.369627  | 3.647486  | -0.914281 |
| 28 | 1 | 0 | 2.936460  | 3.562183  | 2.630130  |
| 29 | 1 | 0 | 4.726122  | 4.633244  | 1.274284  |
| 30 | 6 | 0 | -2.725632 | -0.980637 | -1.386684 |
| 31 | 6 | 0 | -2.971312 | -2.116210 | -0.608810 |
| 32 | 6 | 0 | -3.509865 | -0.770100 | -2.532209 |
| 33 | 6 | 0 | -3.981522 | -3.013185 | -0.956222 |
| 34 | 1 | 0 | -2.360956 | -2.290562 | 0.273264  |
| 35 | 6 | 0 | -4.516080 | -1.667134 | -2.881692 |
| 36 | 1 | 0 | -3.346240 | 0.099204  | -3.163626 |
| 37 | 6 | 0 | -4.756098 | -2.792043 | -2.092423 |
| 38 | 1 | 0 | -4.158273 | -3.888215 | -0.336121 |
| 39 | 1 | 0 | -5.113371 | -1.486144 | -3.771850 |
| 40 | 1 | 0 | -5.541245 | -3.492589 | -2.365176 |
| 41 | 6 | 0 | -2.179529 | 1.763258  | -0.565486 |
| 42 | 6 | 0 | -3.555808 | 1.983665  | -0.688325 |
| 43 | 6 | 0 | -1.367700 | 2.816698  | -0.120639 |
| 44 | 6 | 0 | -4.103534 | 3.232633  | -0.391633 |
| 45 | 1 | 0 | -4.214125 | 1.176787  | -0.997035 |
| 46 | 6 | 0 | -1.911423 | 4.067924  | 0.155485  |
| 47 | 1 | 0 | -0.305205 | 2.642333  | 0.038120  |
| 48 | 6 | 0 | -3.283928 | 4.280358  | 0.020913  |
| 49 | 1 | 0 | -5.176840 | 3.381802  | -0.479611 |
| 50 | 1 | 0 | -1.264661 | 4.872743  | 0.495706  |
| 51 | 1 | 0 | -3.712557 | 5.252299  | 0.251198  |
| 52 | 6 | 0 | -1.372088 | -0.778012 | 2.038940  |
| 53 | 6 | 0 | -0.829625 | -1.735928 | 2.916512  |
| 54 | 6 | 0 | -2.552583 | -0.134704 | 2.441723  |
| 55 | 6 | 0 | -1.417079 | -2.026213 | 4.150587  |
| 56 | 1 | 0 | 0.079457  | -2.282055 | 2.639208  |
| 57 | 6 | 0 | -3.148581 | -0.420966 | 3.672157  |
| 58 | 1 | 0 | -3.012107 | 0.615385  | 1.800612  |
| 59 | 6 | 0 | -2.586255 | -1.366638 | 4.531427  |
| 60 | 1 | 0 | -0.970415 | -2.770578 | 4.807226  |
| 61 | 1 | 0 | -4.056880 | 0.102361  | 3.965702  |
| 62 | 1 | 0 | -3.055600 | -1.589383 | 5.486704  |
| 63 | 6 | 0 | 0.724432  | 1.111181  | -2.729959 |
| 64 | 1 | 0 | 0.864158  | 1.436254  | -3.767946 |
| 65 | 1 | 0 | 0.787420  | 2.024137  | -2.125384 |
| 66 | 1 | 0 | -1.383797 | 1.134451  | -3.150726 |
| 67 | 1 | 0 | -0.667279 | -0.476136 | -3.158185 |

-----  
SCF Done: E(RPBE1PBE) = -6644.38270067 A.U. after 1 cycles

```

Convrg = 0.2048D-08          -V/T = 2.0048
Zero-point correction=      0.546383 (Hartree/Particle)
Thermal correction to Energy= 0.587556
Thermal correction to Enthalpy= 0.588611
Thermal correction to Gibbs Free Energy= 0.463153
Sum of electronic and zero-point Energies= -6643.836317
Sum of electronic and thermal Energies= -6643.795145
Sum of electronic and thermal Enthalpies= -6643.794090
Sum of electronic and thermal Free Energies= -6643.919548

          1              2              3
          A              A              A
Frequencies -- 7.9298      14.2718      22.6496

```

### DPPP-Rh-Ph-O=C=O-conf1 (4)

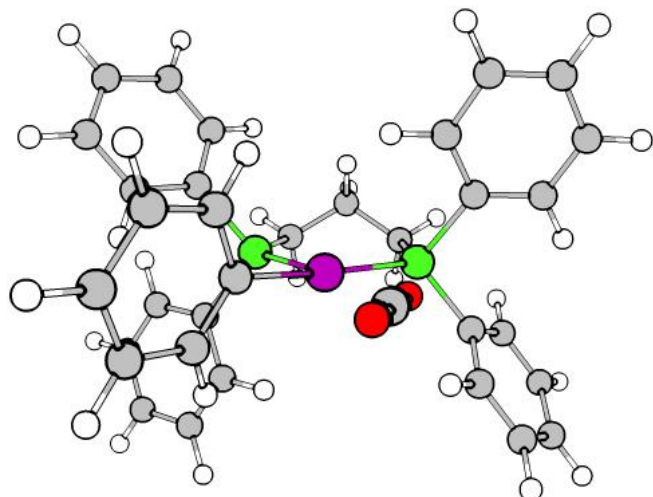

| Center Number | Atomic Number | Atomic Type | Coordinates (Angstroms) |           |           |
|---------------|---------------|-------------|-------------------------|-----------|-----------|
|               |               |             | X                       | Y         | Z         |
| 1             | 45            | 0           | -0.080123               | -0.186906 | 0.505128  |
| 2             | 15            | 0           | 1.351339                | 0.645645  | -0.955851 |
| 3             | 15            | 0           | -2.052015               | 0.343282  | -0.658549 |
| 4             | 6             | 0           | -1.898345               | 1.087374  | -2.350180 |
| 5             | 6             | 0           | 0.638745                | 1.341002  | -2.527023 |
| 6             | 1             | 0           | -1.904128               | 2.177688  | -2.235048 |
| 7             | 1             | 0           | -2.775904               | 0.812463  | -2.945155 |
| 8             | 6             | 0           | -3.300704               | 1.437626  | 0.130304  |
| 9             | 6             | 0           | -4.252743               | 2.172361  | -0.589398 |
| 10            | 6             | 0           | -3.284571               | 1.548063  | 1.526161  |
| 11            | 6             | 0           | -5.167913               | 2.990474  | 0.071008  |
| 12            | 1             | 0           | -4.289362               | 2.112136  | -1.674014 |
| 13            | 6             | 0           | -4.203641               | 2.359526  | 2.188580  |
| 14            | 1             | 0           | -2.538414               | 0.999595  | 2.095671  |
| 15            | 6             | 0           | -5.147530               | 3.083837  | 1.462013  |
| 16            | 1             | 0           | -5.898425               | 3.554958  | -0.502970 |
| 17            | 1             | 0           | -4.176558               | 2.432892  | 3.272721  |
| 18            | 1             | 0           | -5.860920               | 3.722380  | 1.976364  |
| 19            | 6             | 0           | -3.000037               | -1.196484 | -1.026557 |
| 20            | 6             | 0           | -4.397599               | -1.269765 | -1.055485 |
| 21            | 6             | 0           | -2.258441               | -2.354246 | -1.301485 |
| 22            | 6             | 0           | -5.037591               | -2.468574 | -1.366981 |
| 23            | 1             | 0           | -4.995591               | -0.392541 | -0.822475 |
| 24            | 6             | 0           | -2.898516               | -3.549423 | -1.624508 |
| 25            | 1             | 0           | -1.171349               | -2.314368 | -1.247189 |

|    |   |   |           |           |           |
|----|---|---|-----------|-----------|-----------|
| 26 | 6 | 0 | -4.290869 | -3.609760 | -1.657923 |
| 27 | 1 | 0 | -6.123887 | -2.511135 | -1.378628 |
| 28 | 1 | 0 | -2.307867 | -4.436953 | -1.837338 |
| 29 | 1 | 0 | -4.792217 | -4.543358 | -1.899798 |
| 30 | 6 | 0 | 2.323051  | 2.115049  | -0.421067 |
| 31 | 6 | 0 | 1.827060  | 2.901890  | 0.623526  |
| 32 | 6 | 0 | 3.481577  | 2.528783  | -1.090351 |
| 33 | 6 | 0 | 2.474552  | 4.079867  | 0.993795  |
| 34 | 1 | 0 | 0.925956  | 2.578675  | 1.142088  |
| 35 | 6 | 0 | 4.132701  | 3.702294  | -0.716681 |
| 36 | 1 | 0 | 3.885219  | 1.929501  | -1.903001 |
| 37 | 6 | 0 | 3.630312  | 4.481149  | 0.325994  |
| 38 | 1 | 0 | 2.078477  | 4.680919  | 1.808512  |
| 39 | 1 | 0 | 5.034475  | 4.009026  | -1.240730 |
| 40 | 1 | 0 | 4.140272  | 5.395595  | 0.618134  |
| 41 | 6 | 0 | 2.659087  | -0.485639 | -1.586605 |
| 42 | 6 | 0 | 3.790940  | -0.752985 | -0.803626 |
| 43 | 6 | 0 | 2.525837  | -1.144958 | -2.814596 |
| 44 | 6 | 0 | 4.769344  | -1.637321 | -1.248929 |
| 45 | 1 | 0 | 3.909926  | -0.267039 | 0.160787  |
| 46 | 6 | 0 | 3.500976  | -2.039038 | -3.256080 |
| 47 | 1 | 0 | 1.658309  | -0.970589 | -3.444987 |
| 48 | 6 | 0 | 4.628738  | -2.285469 | -2.476172 |
| 49 | 1 | 0 | 5.641606  | -1.825232 | -0.628161 |
| 50 | 1 | 0 | 3.377963  | -2.539374 | -4.213407 |
| 51 | 1 | 0 | 5.391811  | -2.978834 | -2.820380 |
| 52 | 6 | 0 | 1.521213  | -0.864570 | 1.591510  |
| 53 | 6 | 0 | 2.081003  | -0.141642 | 2.661660  |
| 54 | 6 | 0 | 1.925272  | -2.208387 | 1.460667  |
| 55 | 6 | 0 | 2.976267  | -0.728051 | 3.561835  |
| 56 | 1 | 0 | 1.823297  | 0.907756  | 2.797638  |
| 57 | 6 | 0 | 2.813791  | -2.804610 | 2.358487  |
| 58 | 1 | 0 | 1.546862  | -2.803768 | 0.629888  |
| 59 | 6 | 0 | 3.345764  | -2.065271 | 3.415750  |
| 60 | 1 | 0 | 3.389110  | -0.136564 | 4.377377  |
| 61 | 1 | 0 | 3.098036  | -3.847379 | 2.227789  |
| 62 | 1 | 0 | 4.042049  | -2.523927 | 4.114052  |
| 63 | 6 | 0 | -0.620005 | 0.660666  | -3.072535 |
| 64 | 1 | 0 | -0.722724 | 0.933418  | -4.129791 |
| 65 | 1 | 0 | -0.524066 | -0.431515 | -3.048317 |
| 66 | 1 | 0 | 1.433973  | 1.346558  | -3.280915 |
| 67 | 1 | 0 | 0.415928  | 2.392580  | -2.312925 |
| 68 | 6 | 0 | -0.950913 | -1.962910 | 3.156941  |
| 69 | 8 | 0 | -0.573222 | -2.628236 | 4.031740  |
| 70 | 8 | 0 | -1.378911 | -1.298242 | 2.290420  |

```

-----
SCF Done: E(RPBE1PBE) = -6832.80184169 A.U. after 1 cycles
          Conv = 0.5413D-08 -V/T = 2.0050
Zero-point correction= 0.559483 (Hartree/Particle)
Thermal correction to Energy= 0.605326
Thermal correction to Enthalpy= 0.606381
Thermal correction to Gibbs Free Energy= 0.469443
Sum of electronic and zero-point Energies= -6832.242359
Sum of electronic and thermal Energies= -6832.196515
Sum of electronic and thermal Enthalpies= -6832.195460
Sum of electronic and thermal Free Energies= -6832.332399

          1          2          3
          A          A          A
Frequencies -- 12.2907 18.0576 19.1910

```

DPPP-Rh-Ph-O=C=O-conf2 (5)

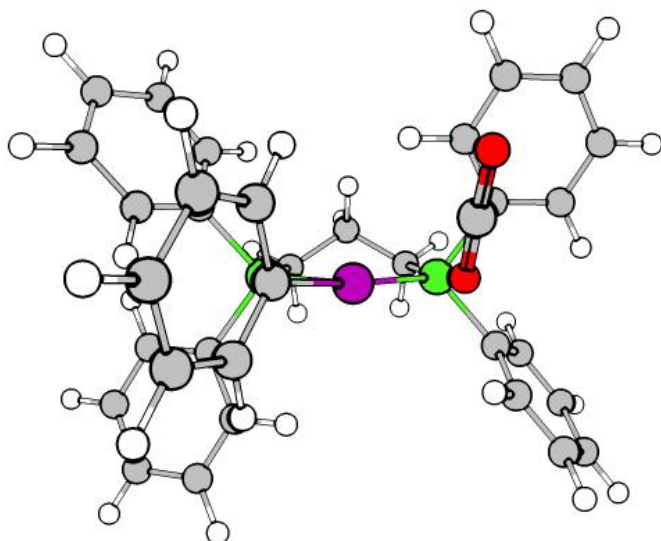

| Center Number | Atomic Number | Atomic Type | Coordinates (Angstroms) |           |           |
|---------------|---------------|-------------|-------------------------|-----------|-----------|
|               |               |             | X                       | Y         | Z         |
| 1             | 45            | 0           | -0.062557               | -0.123588 | 0.555023  |
| 2             | 15            | 0           | 1.414672                | 0.617292  | -0.911344 |
| 3             | 15            | 0           | -2.003446               | 0.439152  | -0.645701 |
| 4             | 6             | 0           | -1.814493               | 1.133478  | -2.355211 |
| 5             | 6             | 0           | 0.731503                | 1.323466  | -2.488977 |
| 6             | 1             | 0           | -1.801260               | 2.226368  | -2.268815 |
| 7             | 1             | 0           | -2.689163               | 0.859435  | -2.954740 |
| 8             | 6             | 0           | -3.222158               | 1.586868  | 0.111288  |
| 9             | 6             | 0           | -4.150429               | 2.331654  | -0.628766 |
| 10            | 6             | 0           | -3.208799               | 1.725418  | 1.504784  |
| 11            | 6             | 0           | -5.045290               | 3.188483  | 0.009935  |
| 12            | 1             | 0           | -4.184614               | 2.247694  | -1.711940 |
| 13            | 6             | 0           | -4.108093               | 2.575695  | 2.145355  |
| 14            | 1             | 0           | -2.481937               | 1.168096  | 2.090631  |
| 15            | 6             | 0           | -5.028095               | 3.310422  | 1.398879  |
| 16            | 1             | 0           | -5.757724               | 3.760518  | -0.579068 |
| 17            | 1             | 0           | -4.083733               | 2.670628  | 3.227836  |
| 18            | 1             | 0           | -5.725723               | 3.979181  | 1.896169  |
| 19            | 6             | 0           | -2.996853               | -1.081579 | -0.972622 |
| 20            | 6             | 0           | -4.395941               | -1.123368 | -0.959536 |
| 21            | 6             | 0           | -2.290042               | -2.262066 | -1.245866 |
| 22            | 6             | 0           | -5.071466               | -2.313373 | -1.227722 |
| 23            | 1             | 0           | -4.966698               | -0.228004 | -0.727343 |
| 24            | 6             | 0           | -2.966048               | -3.448710 | -1.524443 |
| 25            | 1             | 0           | -1.201194               | -2.246721 | -1.224857 |
| 26            | 6             | 0           | -4.359921               | -3.477371 | -1.515760 |
| 27            | 1             | 0           | -6.158302               | -2.330923 | -1.207056 |
| 28            | 1             | 0           | -2.401933               | -4.353707 | -1.735370 |
| 29            | 1             | 0           | -4.889140               | -4.403959 | -1.722390 |
| 30            | 6             | 0           | 2.443736                | 2.053915  | -0.394806 |
| 31            | 6             | 0           | 1.951696                | 2.898999  | 0.605445  |
| 32            | 6             | 0           | 3.642795                | 2.387443  | -1.035881 |
| 33            | 6             | 0           | 2.643358                | 4.056297  | 0.959756  |
| 34            | 1             | 0           | 1.019195                | 2.636448  | 1.102715  |
| 35            | 6             | 0           | 4.338024                | 3.540548  | -0.677574 |
| 36            | 1             | 0           | 4.042622                | 1.741793  | -1.814124 |
| 37            | 6             | 0           | 3.839654                | 4.378019  | 0.320450  |

|    |   |   |           |           |           |
|----|---|---|-----------|-----------|-----------|
| 38 | 1 | 0 | 2.250362  | 4.703100  | 1.740197  |
| 39 | 1 | 0 | 5.271094  | 3.785378  | -1.178923 |
| 40 | 1 | 0 | 4.384089  | 5.276198  | 0.600589  |
| 41 | 6 | 0 | 2.672940  | -0.579209 | -1.522613 |
| 42 | 6 | 0 | 3.760307  | -0.924733 | -0.707169 |
| 43 | 6 | 0 | 2.547008  | -1.206588 | -2.768018 |
| 44 | 6 | 0 | 4.701859  | -1.855595 | -1.136588 |
| 45 | 1 | 0 | 3.873433  | -0.464225 | 0.270296  |
| 46 | 6 | 0 | 3.484758  | -2.147374 | -3.193560 |
| 47 | 1 | 0 | 1.715080  | -0.970697 | -3.425454 |
| 48 | 6 | 0 | 4.567944  | -2.472903 | -2.380502 |
| 49 | 1 | 0 | 5.540041  | -2.103634 | -0.490504 |
| 50 | 1 | 0 | 3.367628  | -2.621727 | -4.164746 |
| 51 | 1 | 0 | 5.301922  | -3.202850 | -2.712072 |
| 52 | 6 | 0 | 1.492195  | -0.819327 | 1.690732  |
| 53 | 6 | 0 | 2.103075  | -0.059416 | 2.704808  |
| 54 | 6 | 0 | 1.798964  | -2.193987 | 1.663183  |
| 55 | 6 | 0 | 2.952253  | -0.639029 | 3.652031  |
| 56 | 1 | 0 | 1.921255  | 1.012607  | 2.761373  |
| 57 | 6 | 0 | 2.639314  | -2.784464 | 2.610690  |
| 58 | 1 | 0 | 1.384242  | -2.823941 | 0.875887  |
| 59 | 6 | 0 | 3.223007  | -2.007355 | 3.611919  |
| 60 | 1 | 0 | 3.407128  | -0.018316 | 4.422284  |
| 61 | 1 | 0 | 2.846817  | -3.851987 | 2.559866  |
| 62 | 1 | 0 | 3.884997  | -2.460184 | 4.346521  |
| 63 | 6 | 0 | -0.533969 | 0.665006  | -3.047200 |
| 64 | 1 | 0 | -0.611885 | 0.923032  | -4.110232 |
| 65 | 1 | 0 | -0.464675 | -0.428493 | -3.004391 |
| 66 | 1 | 0 | 1.534389  | 1.318302  | -3.234863 |
| 67 | 1 | 0 | 0.524880  | 2.378231  | -2.274098 |
| 68 | 6 | 0 | -1.409743 | -2.413241 | 2.441708  |
| 69 | 8 | 0 | -1.371528 | -3.557682 | 2.645586  |
| 70 | 8 | 0 | -1.478824 | -1.259692 | 2.246583  |

-----

SCF Done: E(RPBE1PBE) = -6832.80192876 A.U. after 1 cycles  
 Conv = 0.1810D-08 -V/T = 2.0050

Zero-point correction= 0.559559 (Hartree/Particle)  
 Thermal correction to Energy= 0.605390  
 Thermal correction to Enthalpy= 0.606445  
 Thermal correction to Gibbs Free Energy= 0.469258  
 Sum of electronic and zero-point Energies= -6832.242370  
 Sum of electronic and thermal Energies= -6832.196539  
 Sum of electronic and thermal Enthalpies= -6832.195484  
 Sum of electronic and thermal Free Energies= -6832.332671

|                | 1       | 2       | 3       |
|----------------|---------|---------|---------|
|                | A       | A       | A       |
| Frequencies -- | 12.5166 | 14.6910 | 16.9084 |

DPPP-Rh-Ph-O=C=O-TS1 (6)

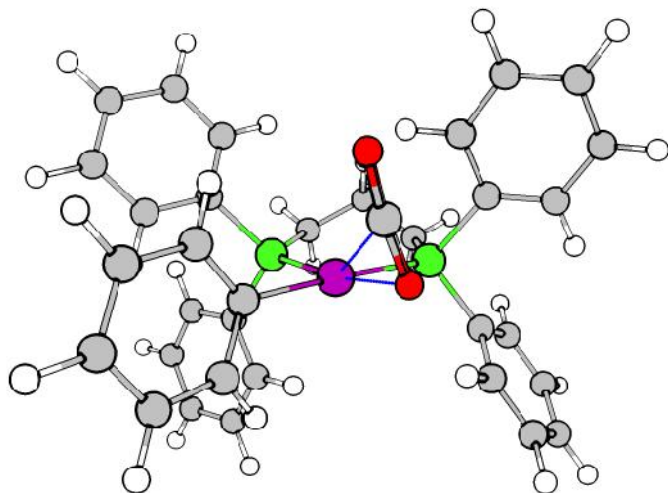

| Center Number | Atomic Number | Atomic Type | Coordinates (Angstroms) |           |           |
|---------------|---------------|-------------|-------------------------|-----------|-----------|
|               |               |             | X                       | Y         | Z         |
| 1             | 45            | 0           | -0.055760               | -0.075823 | 0.639109  |
| 2             | 15            | 0           | 1.351752                | 0.288183  | -1.050333 |
| 3             | 15            | 0           | -2.047962               | 0.193974  | -0.594682 |
| 4             | 6             | 0           | -1.899857               | 0.530227  | -2.408963 |
| 5             | 6             | 0           | 0.630926                | 0.488932  | -2.759882 |
| 6             | 1             | 0           | -1.783301               | 1.612351  | -2.541142 |
| 7             | 1             | 0           | -2.831119               | 0.234404  | -2.903439 |
| 8             | 6             | 0           | -3.165048               | 1.529886  | -0.014238 |
| 9             | 6             | 0           | -4.001301               | 2.266988  | -0.862313 |
| 10            | 6             | 0           | -3.169626               | 1.822503  | 1.356091  |
| 11            | 6             | 0           | -4.821866               | 3.272264  | -0.352242 |
| 12            | 1             | 0           | -4.024459               | 2.060834  | -1.928904 |
| 13            | 6             | 0           | -3.996680               | 2.820048  | 1.867591  |
| 14            | 1             | 0           | -2.520765               | 1.264429  | 2.026437  |
| 15            | 6             | 0           | -4.823173               | 3.549641  | 1.013855  |
| 16            | 1             | 0           | -5.463037               | 3.837031  | -1.024215 |
| 17            | 1             | 0           | -3.989507               | 3.031999  | 2.933564  |
| 18            | 1             | 0           | -5.463634               | 4.332736  | 1.410988  |
| 19            | 6             | 0           | -3.139603               | -1.291721 | -0.603035 |
| 20            | 6             | 0           | -4.533820               | -1.224719 | -0.495444 |
| 21            | 6             | 0           | -2.532952               | -2.547806 | -0.742285 |
| 22            | 6             | 0           | -5.303335               | -2.385979 | -0.540931 |
| 23            | 1             | 0           | -5.025133               | -0.263980 | -0.365585 |
| 24            | 6             | 0           | -3.304119               | -3.707511 | -0.798217 |
| 25            | 1             | 0           | -1.448098               | -2.618703 | -0.789859 |
| 26            | 6             | 0           | -4.692133               | -3.629386 | -0.698027 |
| 27            | 1             | 0           | -6.384499               | -2.318159 | -0.449595 |
| 28            | 1             | 0           | -2.816555               | -4.673077 | -0.904679 |
| 29            | 1             | 0           | -5.294228               | -4.533635 | -0.730888 |
| 30            | 6             | 0           | 2.272131                | 1.877224  | -0.955374 |
| 31            | 6             | 0           | 1.745239                | 2.899627  | -0.159894 |
| 32            | 6             | 0           | 3.405552                | 2.139749  | -1.735149 |
| 33            | 6             | 0           | 2.340831                | 4.159673  | -0.136859 |
| 34            | 1             | 0           | 0.859744                | 2.698716  | 0.440118  |
| 35            | 6             | 0           | 4.005373                | 3.396749  | -1.706908 |
| 36            | 1             | 0           | 3.829504                | 1.359642  | -2.362887 |
| 37            | 6             | 0           | 3.474755                | 4.409486  | -0.907477 |
| 38            | 1             | 0           | 1.921602                | 4.943802  | 0.488425  |
| 39            | 1             | 0           | 4.889259                | 3.585486  | -2.310950 |



|    |   |   |           |           |           |
|----|---|---|-----------|-----------|-----------|
| 40 | 1 | 0 | 3.945580  | 5.388908  | -0.884922 |
| 41 | 6 | 0 | 2.668289  | -0.961196 | -1.335057 |
| 42 | 6 | 0 | 3.881520  | -0.899185 | -0.638369 |
| 43 | 6 | 0 | 2.443034  | -2.040018 | -2.198672 |
| 44 | 6 | 0 | 4.854665  | -1.878336 | -0.824563 |
| 45 | 1 | 0 | 4.068619  | -0.085027 | 0.055975  |
| 46 | 6 | 0 | 3.412916  | -3.024570 | -2.377562 |
| 47 | 1 | 0 | 1.503631  | -2.125560 | -2.739006 |
| 48 | 6 | 0 | 4.625311  | -2.943489 | -1.694265 |
| 49 | 1 | 0 | 5.792263  | -1.810266 | -0.279002 |
| 50 | 1 | 0 | 3.220021  | -3.854208 | -3.052939 |
| 51 | 1 | 0 | 5.384516  | -3.708355 | -1.835544 |
| 52 | 6 | 0 | 1.586987  | -0.295555 | 1.864161  |
| 53 | 6 | 0 | 1.895620  | 0.753694  | 2.750824  |
| 54 | 6 | 0 | 2.288155  | -1.500242 | 2.048206  |
| 55 | 6 | 0 | 2.839810  | 0.607851  | 3.769633  |
| 56 | 1 | 0 | 1.390404  | 1.714080  | 2.652317  |
| 57 | 6 | 0 | 3.227070  | -1.660253 | 3.071193  |
| 58 | 1 | 0 | 2.103425  | -2.339406 | 1.379543  |
| 59 | 6 | 0 | 3.510503  | -0.604698 | 3.936807  |
| 60 | 1 | 0 | 3.053070  | 1.443284  | 4.434277  |
| 61 | 1 | 0 | 3.742734  | -2.612160 | 3.185972  |
| 62 | 1 | 0 | 4.245272  | -0.723040 | 4.730003  |
| 63 | 6 | 0 | -0.709475 | -0.187809 | -3.049034 |
| 64 | 1 | 0 | -0.856985 | -0.183188 | -4.135627 |
| 65 | 1 | 0 | -0.695508 | -1.243005 | -2.751774 |
| 66 | 1 | 0 | 1.390227  | 0.155829  | -3.475813 |
| 67 | 1 | 0 | 0.521922  | 1.568723  | -2.911540 |
| 68 | 6 | 0 | -0.877102 | -1.994613 | 2.136457  |
| 69 | 8 | 0 | -0.587769 | -3.117804 | 1.990248  |
| 70 | 8 | 0 | -1.305257 | -0.937887 | 2.464209  |

```

-----
SCF Done: E(RPBE1PBE) = -6832.79974542      A.U. after 1 cycles
          Convg = 0.7080D-08                -V/T = 2.0050
Zero-point correction= 0.559114 (Hartree/Particle)
Thermal correction to Energy= 0.603836
Thermal correction to Enthalpy= 0.604891
Thermal correction to Gibbs Free Energy= 0.472820
Sum of electronic and zero-point Energies= -6832.240632
Sum of electronic and thermal Energies= -6832.195909
Sum of electronic and thermal Enthalpies= -6832.194854
Sum of electronic and thermal Free Energies= -6832.326926

          1          2          3
          A          A          A
Frequencies --  -94.1523      10.4477      19.3084

```

DPPP-Rh-Ph-CO<sub>2</sub> (7)

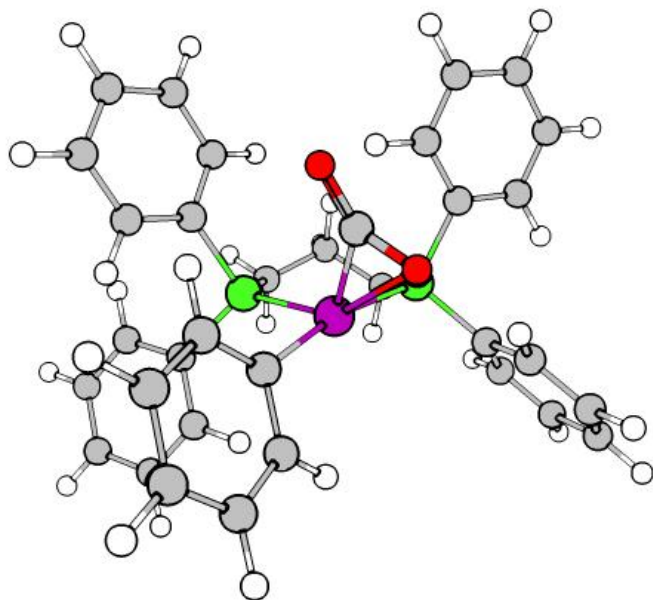

| Center Number | Atomic Number | Atomic Type | Coordinates (Angstroms) |           |           |
|---------------|---------------|-------------|-------------------------|-----------|-----------|
|               |               |             | X                       | Y         | Z         |
| 1             | 45            | 0           | -0.042945               | -0.567610 | -0.539864 |
| 2             | 15            | 0           | 1.342267                | 0.448703  | 0.941357  |
| 3             | 15            | 0           | -2.079173               | -0.051675 | 0.635452  |
| 4             | 6             | 0           | -1.877048               | 0.324754  | 2.426681  |
| 5             | 6             | 0           | 0.605039                | 0.984501  | 2.569039  |
| 6             | 1             | 0           | -1.549465               | -0.589646 | 2.935597  |
| 7             | 1             | 0           | -2.846071               | 0.614821  | 2.847170  |
| 8             | 6             | 0           | -3.193662               | -1.502571 | 0.590706  |
| 9             | 6             | 0           | -3.782922               | -2.067313 | 1.727503  |
| 10            | 6             | 0           | -3.436974               | -2.082161 | -0.663540 |
| 11            | 6             | 0           | -4.605107               | -3.188338 | 1.612871  |
| 12            | 1             | 0           | -3.611672               | -1.639283 | 2.711072  |
| 13            | 6             | 0           | -4.265397               | -3.195028 | -0.775229 |
| 14            | 1             | 0           | -2.974370               | -1.658569 | -1.552399 |
| 15            | 6             | 0           | -4.849635               | -3.752511 | 0.362657  |
| 16            | 1             | 0           | -5.056124               | -3.618151 | 2.503568  |
| 17            | 1             | 0           | -4.448249               | -3.632356 | -1.753125 |
| 18            | 1             | 0           | -5.490912               | -4.625530 | 0.274997  |
| 19            | 6             | 0           | -3.153940               | 1.332759  | 0.092398  |
| 20            | 6             | 0           | -4.535003               | 1.323850  | 0.327213  |
| 21            | 6             | 0           | -2.573749               | 2.445970  | -0.525695 |
| 22            | 6             | 0           | -5.318409               | 2.414106  | -0.040898 |
| 23            | 1             | 0           | -5.004452               | 0.457655  | 0.787689  |
| 24            | 6             | 0           | -3.360373               | 3.538794  | -0.889743 |
| 25            | 1             | 0           | -1.509656               | 2.456189  | -0.746853 |
| 26            | 6             | 0           | -4.731828               | 3.525698  | -0.647419 |
| 27            | 1             | 0           | -6.389969               | 2.393576  | 0.140365  |
| 28            | 1             | 0           | -2.898184               | 4.392739  | -1.377669 |
| 29            | 1             | 0           | -5.345818               | 4.373480  | -0.939948 |
| 30            | 6             | 0           | 2.774300                | -0.471560 | 1.631662  |
| 31            | 6             | 0           | 2.784057                | -1.867926 | 1.594174  |
| 32            | 6             | 0           | 3.802047                | 0.197715  | 2.310426  |
| 33            | 6             | 0           | 3.803624                | -2.585846 | 2.217943  |
| 34            | 1             | 0           | 2.000776                | -2.397157 | 1.060320  |
| 35            | 6             | 0           | 4.822479                | -0.519095 | 2.929112  |

|    |   |   |           |           |           |
|----|---|---|-----------|-----------|-----------|
| 36 | 1 | 0 | 3.814877  | 1.284275  | 2.348702  |
| 37 | 6 | 0 | 4.825177  | -1.913604 | 2.884664  |
| 38 | 1 | 0 | 3.802830  | -3.671612 | 2.172011  |
| 39 | 1 | 0 | 5.617835  | 0.012788  | 3.444830  |
| 40 | 1 | 0 | 5.624442  | -2.472501 | 3.364331  |
| 41 | 6 | 0 | 2.100833  | 1.978709  | 0.282496  |
| 42 | 6 | 0 | 3.313250  | 1.922479  | -0.415776 |
| 43 | 6 | 0 | 1.453165  | 3.211913  | 0.412512  |
| 44 | 6 | 0 | 3.863814  | 3.076551  | -0.967411 |
| 45 | 1 | 0 | 3.837926  | 0.977226  | -0.520962 |
| 46 | 6 | 0 | 2.004807  | 4.365286  | -0.139800 |
| 47 | 1 | 0 | 0.510376  | 3.287029  | 0.945950  |
| 48 | 6 | 0 | 3.211171  | 4.300849  | -0.833951 |
| 49 | 1 | 0 | 4.806598  | 3.015580  | -1.504781 |
| 50 | 1 | 0 | 1.487848  | 5.314828  | -0.028712 |
| 51 | 1 | 0 | 3.640574  | 5.199839  | -1.267949 |
| 52 | 6 | 0 | 1.541677  | -1.373067 | -1.563240 |
| 53 | 6 | 0 | 1.540660  | -2.778805 | -1.545275 |
| 54 | 6 | 0 | 2.482629  | -0.739444 | -2.383960 |
| 55 | 6 | 0 | 2.454157  | -3.520837 | -2.295767 |
| 56 | 1 | 0 | 0.808774  | -3.320679 | -0.942700 |
| 57 | 6 | 0 | 3.399235  | -1.476333 | -3.139823 |
| 58 | 1 | 0 | 2.491472  | 0.345457  | -2.460430 |
| 59 | 6 | 0 | 3.395082  | -2.869232 | -3.094058 |
| 60 | 1 | 0 | 2.427468  | -4.608319 | -2.260847 |
| 61 | 1 | 0 | 4.114551  | -0.956394 | -3.774405 |
| 62 | 1 | 0 | 4.108661  | -3.442222 | -3.681294 |
| 63 | 6 | 0 | -0.852891 | 1.439494  | 2.653152  |
| 64 | 1 | 0 | -1.001930 | 1.832765  | 3.665646  |
| 65 | 1 | 0 | -1.058560 | 2.279921  | 1.981353  |
| 66 | 1 | 0 | 1.261810  | 1.769227  | 2.962181  |
| 67 | 1 | 0 | 0.737976  | 0.119190  | 3.228875  |
| 68 | 6 | 0 | -0.381204 | 0.549349  | -2.220399 |
| 69 | 8 | 0 | 0.056792  | 1.623205  | -2.538059 |
| 70 | 8 | 0 | -1.116496 | -0.383425 | -2.564466 |

```

-----
SCF Done: E(RPBE1PBE) = -6832.80859017 A.U. after 1 cycles
          Conv = 0.4941D-08 -V/T = 2.0050
Zero-point correction= 0.560199 (Hartree/Particle)
Thermal correction to Energy= 0.605021
Thermal correction to Enthalpy= 0.606076
Thermal correction to Gibbs Free Energy= 0.475136
Sum of electronic and zero-point Energies= -6832.248392
Sum of electronic and thermal Energies= -6832.203569
Sum of electronic and thermal Enthalpies= -6832.202514
Sum of electronic and thermal Free Energies= -6832.333455

          1          2          3
          A          A          A
Frequencies -- 12.2737 24.0209 30.2365

```

DPPP-Rh-Ph-CO<sub>2</sub>-TS2 (8)

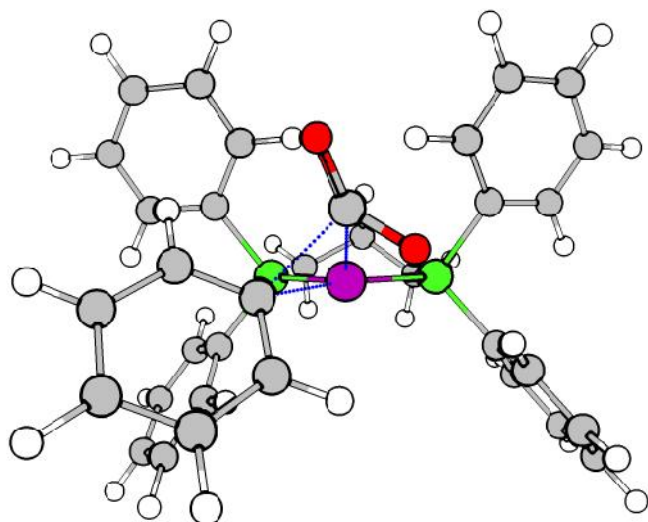

| Center Number | Atomic Number | Atomic Type | Coordinates (Angstroms) |           |           |
|---------------|---------------|-------------|-------------------------|-----------|-----------|
|               |               |             | X                       | Y         | Z         |
| 1             | 45            | 0           | 0.135087                | -0.149066 | 0.626295  |
| 2             | 15            | 0           | -1.304725               | 0.171639  | -1.100771 |
| 3             | 15            | 0           | 2.046155                | -0.101775 | -0.702032 |
| 4             | 6             | 0           | 1.882901                | 0.098027  | -2.522555 |
| 5             | 6             | 0           | -0.614963               | 0.490242  | -2.803081 |
| 6             | 1             | 0           | 1.635864                | -0.876619 | -2.958543 |
| 7             | 1             | 0           | 2.845436                | 0.415663  | -2.936808 |
| 8             | 6             | 0           | 3.102827                | -1.581659 | -0.481748 |
| 9             | 6             | 0           | 3.704970                | -2.273017 | -1.538503 |
| 10            | 6             | 0           | 3.307175                | -2.031014 | 0.830874  |
| 11            | 6             | 0           | 4.496659                | -3.394348 | -1.288398 |
| 12            | 1             | 0           | 3.569048                | -1.945738 | -2.565499 |
| 13            | 6             | 0           | 4.104796                | -3.144166 | 1.077847  |
| 14            | 1             | 0           | 2.841979                | -1.502671 | 1.660103  |
| 15            | 6             | 0           | 4.699283                | -3.831118 | 0.018594  |
| 16            | 1             | 0           | 4.957219                | -3.923700 | -2.118564 |
| 17            | 1             | 0           | 4.258291                | -3.479417 | 2.100219  |
| 18            | 1             | 0           | 5.317455                | -4.703772 | 0.212090  |
| 19            | 6             | 0           | 3.182781                | 1.277600  | -0.273382 |
| 20            | 6             | 0           | 4.534859                | 1.243209  | -0.638451 |
| 21            | 6             | 0           | 2.687076                | 2.399252  | 0.397056  |
| 22            | 6             | 0           | 5.369416                | 2.319241  | -0.350484 |
| 23            | 1             | 0           | 4.944855                | 0.367299  | -1.136575 |
| 24            | 6             | 0           | 3.523198                | 3.478124  | 0.683659  |
| 25            | 1             | 0           | 1.647062                | 2.418755  | 0.711680  |
| 26            | 6             | 0           | 4.863805                | 3.440991  | 0.308721  |
| 27            | 1             | 0           | 6.418050                | 2.279792  | -0.634010 |
| 28            | 1             | 0           | 3.125824                | 4.340560  | 1.212089  |
| 29            | 1             | 0           | 5.517956                | 4.278163  | 0.537991  |
| 30            | 6             | 0           | -2.511940               | -1.163764 | -1.480414 |
| 31            | 6             | 0           | -2.735323               | -2.178376 | -0.544426 |
| 32            | 6             | 0           | -3.201967               | -1.210287 | -2.702045 |
| 33            | 6             | 0           | -3.631549               | -3.211127 | -0.817512 |
| 34            | 1             | 0           | -2.203269               | -2.162070 | 0.401742  |
| 35            | 6             | 0           | -4.095814               | -2.242699 | -2.974559 |
| 36            | 1             | 0           | -3.050696               | -0.439116 | -3.452786 |
| 37            | 6             | 0           | -4.313411               | -3.246936 | -2.031180 |
| 38            | 1             | 0           | -3.791865               | -3.990093 | -0.076803 |

|    |   |   |           |           |           |
|----|---|---|-----------|-----------|-----------|
| 39 | 1 | 0 | -4.622336 | -2.261723 | -3.925330 |
| 40 | 1 | 0 | -5.009569 | -4.053859 | -2.244698 |
| 41 | 6 | 0 | -2.330319 | 1.683159  | -0.865678 |
| 42 | 6 | 0 | -3.695240 | 1.746736  | -1.166155 |
| 43 | 6 | 0 | -1.689548 | 2.830129  | -0.380416 |
| 44 | 6 | 0 | -4.399201 | 2.938696  | -0.998753 |
| 45 | 1 | 0 | -4.223208 | 0.862618  | -1.511455 |
| 46 | 6 | 0 | -2.391184 | 4.022747  | -0.223823 |
| 47 | 1 | 0 | -0.642663 | 2.777149  | -0.091605 |
| 48 | 6 | 0 | -3.749158 | 4.080799  | -0.534522 |
| 49 | 1 | 0 | -5.461896 | 2.970001  | -1.225442 |
| 50 | 1 | 0 | -1.879543 | 4.900851  | 0.161016  |
| 51 | 1 | 0 | -4.301424 | 5.007188  | -0.400648 |
| 52 | 6 | 0 | -1.382003 | -0.403200 | 2.117694  |
| 53 | 6 | 0 | -1.201118 | -1.628654 | 2.782926  |
| 54 | 6 | 0 | -2.646462 | 0.200592  | 2.182497  |
| 55 | 6 | 0 | -2.263835 | -2.264350 | 3.427617  |
| 56 | 1 | 0 | -0.214781 | -2.088150 | 2.802378  |
| 57 | 6 | 0 | -3.709360 | -0.426610 | 2.826243  |
| 58 | 1 | 0 | -2.793564 | 1.180503  | 1.736836  |
| 59 | 6 | 0 | -3.523766 | -1.667196 | 3.441931  |
| 60 | 1 | 0 | -2.104993 | -3.216917 | 3.928270  |
| 61 | 1 | 0 | -4.684648 | 0.053868  | 2.855549  |
| 62 | 1 | 0 | -4.353347 | -2.154583 | 3.948490  |
| 63 | 6 | 0 | 0.782503  | 1.102931  | -2.873545 |
| 64 | 1 | 0 | 0.943655  | 1.445941  | -3.901754 |
| 65 | 1 | 0 | 0.854852  | 1.998106  | -2.243294 |
| 66 | 1 | 0 | -1.327271 | 1.141893  | -3.319359 |
| 67 | 1 | 0 | -0.609709 | -0.468461 | -3.333876 |
| 68 | 6 | 0 | 0.153922  | 0.874035  | 2.519102  |
| 69 | 8 | 0 | -0.252710 | 1.919710  | 2.954506  |
| 70 | 8 | 0 | 1.169812  | 0.145366  | 2.535067  |

```

-----
SCF Done: E(RPBE1PBE) = -6832.79546039 A.U. after 1 cycles
          Conv = 0.2182D-08 -V/T = 2.0050
Zero-point correction= 0.559540 (Hartree/Particle)
Thermal correction to Energy= 0.603683
Thermal correction to Enthalpy= 0.604738
Thermal correction to Gibbs Free Energy= 0.474945
Sum of electronic and zero-point Energies= -6832.235921
Sum of electronic and thermal Energies= -6832.191777
Sum of electronic and thermal Enthalpies= -6832.190722
Sum of electronic and thermal Free Energies= -6832.320516

          1          2          3
          A          A          A
Frequencies -- -290.1578          13.1068          19.1949

```

DPPP-Rh-OOCPh-conf1 (9)

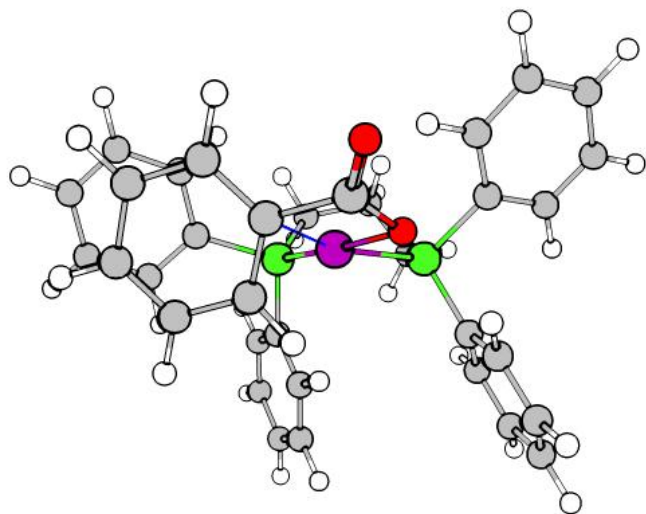

| Center Number | Atomic Number | Atomic Type | Coordinates (Angstroms) |           |           |
|---------------|---------------|-------------|-------------------------|-----------|-----------|
|               |               |             | X                       | Y         | Z         |
| 1             | 45            | 0           | 0.004630                | -0.711948 | -0.399905 |
| 2             | 15            | 0           | -1.355141               | 0.569623  | 0.876700  |
| 3             | 15            | 0           | 1.805156                | 0.255098  | 0.577092  |
| 4             | 6             | 0           | 1.517765                | 1.297890  | 2.066427  |
| 5             | 6             | 0           | -0.903866               | 0.702377  | 2.681654  |
| 6             | 1             | 0           | 1.074412                | 2.255122  | 1.770120  |
| 7             | 1             | 0           | 2.478438                | 1.508316  | 2.547515  |
| 8             | 6             | 0           | 2.753367                | 1.296438  | -0.589760 |
| 9             | 6             | 0           | 3.068690                | 2.636394  | -0.343343 |
| 10            | 6             | 0           | 3.162265                | 0.704196  | -1.794507 |
| 11            | 6             | 0           | 3.783661                | 3.376224  | -1.286191 |
| 12            | 1             | 0           | 2.763732                | 3.118443  | 0.580820  |
| 13            | 6             | 0           | 3.882030                | 1.443958  | -2.727206 |
| 14            | 1             | 0           | 2.907696                | -0.334146 | -1.997367 |
| 15            | 6             | 0           | 4.193006                | 2.782116  | -2.477352 |
| 16            | 1             | 0           | 4.021791                | 4.417480  | -1.084453 |
| 17            | 1             | 0           | 4.198072                | 0.974961  | -3.655373 |
| 18            | 1             | 0           | 4.752330                | 3.358367  | -3.209780 |
| 19            | 6             | 0           | 3.059741                | -0.930454 | 1.196646  |
| 20            | 6             | 0           | 4.346143                | -0.494761 | 1.539483  |
| 21            | 6             | 0           | 2.723340                | -2.275456 | 1.367460  |
| 22            | 6             | 0           | 5.275408                | -1.390127 | 2.060253  |
| 23            | 1             | 0           | 4.630528                | 0.544406  | 1.387059  |
| 24            | 6             | 0           | 3.654896                | -3.171298 | 1.891237  |
| 25            | 1             | 0           | 1.737969                | -2.620089 | 1.066821  |
| 26            | 6             | 0           | 4.929110                | -2.730509 | 2.240164  |
| 27            | 1             | 0           | 6.272953                | -1.044396 | 2.318926  |
| 28            | 1             | 0           | 3.386269                | -4.217327 | 2.011644  |
| 29            | 1             | 0           | 5.657229                | -3.430705 | 2.641417  |
| 30            | 6             | 0           | -1.437069               | 2.330736  | 0.343229  |
| 31            | 6             | 0           | -0.827459               | 2.687453  | -0.864282 |
| 32            | 6             | 0           | -2.075389               | 3.326312  | 1.097333  |
| 33            | 6             | 0           | -0.847043               | 4.009588  | -1.308552 |
| 34            | 1             | 0           | -0.325651               | 1.918488  | -1.447903 |
| 35            | 6             | 0           | -2.096806               | 4.645839  | 0.654255  |
| 36            | 1             | 0           | -2.575255               | 3.075948  | 2.030132  |
| 37            | 6             | 0           | -1.479931               | 4.990891  | -0.549764 |
| 38            | 1             | 0           | -0.361396               | 4.269951  | -2.245249 |

|    |   |   |           |           |           |
|----|---|---|-----------|-----------|-----------|
| 39 | 1 | 0 | -2.597241 | 5.406010  | 1.248522  |
| 40 | 1 | 0 | -1.494369 | 6.022309  | -0.892242 |
| 41 | 6 | 0 | -3.118939 | 0.073163  | 1.024334  |
| 42 | 6 | 0 | -4.173147 | 0.835188  | 0.511471  |
| 43 | 6 | 0 | -3.410416 | -1.145727 | 1.651388  |
| 44 | 6 | 0 | -5.492245 | 0.403675  | 0.651531  |
| 45 | 1 | 0 | -3.971830 | 1.771141  | -0.001739 |
| 46 | 6 | 0 | -4.727191 | -1.573343 | 1.795591  |
| 47 | 1 | 0 | -2.605126 | -1.777541 | 2.020639  |
| 48 | 6 | 0 | -5.774312 | -0.796551 | 1.299815  |
| 49 | 1 | 0 | -6.300118 | 1.010786  | 0.250923  |
| 50 | 1 | 0 | -4.934483 | -2.518938 | 2.289883  |
| 51 | 1 | 0 | -6.802796 | -1.129409 | 1.412363  |
| 52 | 6 | 0 | -1.014126 | -2.397086 | -1.776153 |
| 53 | 6 | 0 | -1.330867 | -1.144515 | -2.349981 |
| 54 | 6 | 0 | -2.055147 | -3.215733 | -1.294498 |
| 55 | 6 | 0 | -2.676696 | -0.740510 | -2.445841 |
| 56 | 1 | 0 | -0.564193 | -0.581682 | -2.879668 |
| 57 | 6 | 0 | -3.370229 | -2.795684 | -1.379269 |
| 58 | 1 | 0 | -1.801037 | -4.190121 | -0.886588 |
| 59 | 6 | 0 | -3.684386 | -1.555883 | -1.961347 |
| 60 | 1 | 0 | -2.917332 | 0.206685  | -2.921843 |
| 61 | 1 | 0 | -4.168473 | -3.430946 | -1.004870 |
| 62 | 1 | 0 | -4.721827 | -1.242390 | -2.035708 |
| 63 | 6 | 0 | 0.580367  | 0.542954  | 3.014980  |
| 64 | 1 | 0 | 0.737525  | 0.899645  | 4.038737  |
| 65 | 1 | 0 | 0.842548  | -0.521167 | 3.020577  |
| 66 | 1 | 0 | -1.479039 | -0.063699 | 3.209467  |
| 67 | 1 | 0 | -1.267737 | 1.668094  | 3.047149  |
| 68 | 6 | 0 | 0.411701  | -2.910117 | -1.828460 |
| 69 | 8 | 0 | 0.651031  | -4.081506 | -2.112142 |
| 70 | 8 | 0 | 1.272777  | -1.988820 | -1.526056 |

```

-----
SCF Done: E(RPBE1PBE) = -6832.84096857 A.U. after 1 cycles
          Convg = 0.2071D-08 -V/T = 2.0050
Zero-point correction= 0.562137 (Hartree/Particle)
Thermal correction to Energy= 0.606236
Thermal correction to Enthalpy= 0.607291
Thermal correction to Gibbs Free Energy= 0.477769
Sum of electronic and zero-point Energies= -6832.278832
Sum of electronic and thermal Energies= -6832.234733
Sum of electronic and thermal Enthalpies= -6832.233678
Sum of electronic and thermal Free Energies= -6832.363200

          1          2          3
          A          A          A
Frequencies -- 14.8645 22.5574 29.4812

```

DPPP-Rh-OOCPh-conf2 (10)

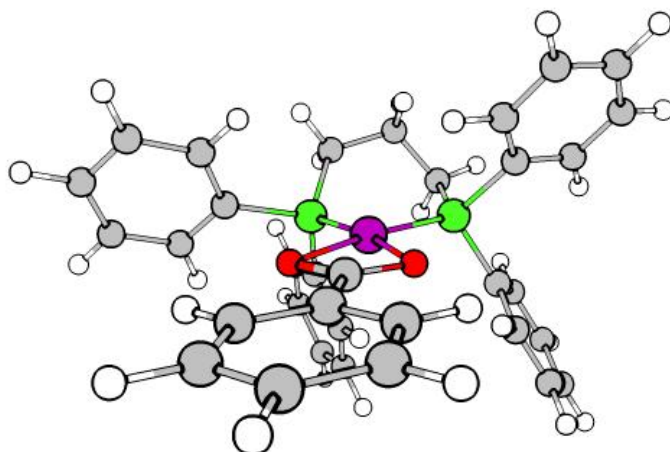

| Center Number | Atomic Number | Atomic Type | Coordinates (Angstroms) |           |           |
|---------------|---------------|-------------|-------------------------|-----------|-----------|
|               |               |             | X                       | Y         | Z         |
| 1             | 45            | 0           | 0.408096                | 0.000242  | -0.164874 |
| 2             | 15            | 0           | -0.724609               | 1.850298  | -0.670145 |
| 3             | 15            | 0           | -1.434763               | -1.203109 | -0.521209 |
| 4             | 6             | 0           | -2.827591               | -0.398336 | -1.424439 |
| 5             | 6             | 0           | -1.756096               | 1.803843  | -2.218058 |
| 6             | 1             | 0           | -3.375023               | 0.253104  | -0.733001 |
| 7             | 1             | 0           | -3.522004               | -1.167024 | -1.779141 |
| 8             | 6             | 0           | -2.182872               | -1.906281 | 0.995476  |
| 9             | 6             | 0           | -3.554813               | -1.895722 | 1.266190  |
| 10            | 6             | 0           | -1.306043               | -2.476649 | 1.929751  |
| 11            | 6             | 0           | -4.044210               | -2.448918 | 2.450089  |
| 12            | 1             | 0           | -4.255416               | -1.455322 | 0.562126  |
| 13            | 6             | 0           | -1.797707               | -3.035933 | 3.105166  |
| 14            | 1             | 0           | -0.235485               | -2.472332 | 1.733289  |
| 15            | 6             | 0           | -3.168484               | -3.021917 | 3.369311  |
| 16            | 1             | 0           | -5.112315               | -2.431310 | 2.651291  |
| 17            | 1             | 0           | -1.108895               | -3.477059 | 3.820912  |
| 18            | 1             | 0           | -3.551087               | -3.453605 | 4.290497  |
| 19            | 6             | 0           | -1.123323               | -2.693994 | -1.551516 |
| 20            | 6             | 0           | -2.061168               | -3.730000 | -1.645509 |
| 21            | 6             | 0           | 0.069676                | -2.784243 | -2.274755 |
| 22            | 6             | 0           | -1.815780               | -4.829173 | -2.463365 |
| 23            | 1             | 0           | -2.981861               | -3.687789 | -1.067220 |
| 24            | 6             | 0           | 0.314583                | -3.885858 | -3.094655 |
| 25            | 1             | 0           | 0.809577                | -1.992691 | -2.177871 |
| 26            | 6             | 0           | -0.627483               | -4.907254 | -3.192123 |
| 27            | 1             | 0           | -2.548372               | -5.629743 | -2.527347 |
| 28            | 1             | 0           | 1.246612                | -3.947707 | -3.650375 |
| 29            | 1             | 0           | -0.435326               | -5.767972 | -3.827559 |
| 30            | 6             | 0           | -1.904710               | 2.424041  | 0.618590  |
| 31            | 6             | 0           | -1.859739               | 1.805893  | 1.873189  |
| 32            | 6             | 0           | -2.835333               | 3.450656  | 0.403334  |
| 33            | 6             | 0           | -2.729378               | 2.198346  | 2.890019  |
| 34            | 1             | 0           | -1.138675               | 1.008178  | 2.040514  |
| 35            | 6             | 0           | -3.703565               | 3.843459  | 1.418770  |
| 36            | 1             | 0           | -2.881966               | 3.962746  | -0.554881 |
| 37            | 6             | 0           | -3.653587               | 3.215829  | 2.664467  |
| 38            | 1             | 0           | -2.684492               | 1.703835  | 3.856674  |
| 39            | 1             | 0           | -4.418294               | 4.642233  | 1.237936  |
| 40            | 1             | 0           | -4.333934               | 3.521453  | 3.455115  |



|    |   |   |           |           |           |
|----|---|---|-----------|-----------|-----------|
| 41 | 6 | 0 | 0.373993  | 3.289693  | -0.965043 |
| 42 | 6 | 0 | 0.335761  | 4.461598  | -0.204492 |
| 43 | 6 | 0 | 1.342888  | 3.161933  | -1.969663 |
| 44 | 6 | 0 | 1.231337  | 5.499313  | -0.464197 |
| 45 | 1 | 0 | -0.387365 | 4.569405  | 0.598903  |
| 46 | 6 | 0 | 2.228825  | 4.201290  | -2.233864 |
| 47 | 1 | 0 | 1.417130  | 2.235843  | -2.536157 |
| 48 | 6 | 0 | 2.173588  | 5.375747  | -1.482344 |
| 49 | 1 | 0 | 1.191898  | 6.404777  | 0.135926  |
| 50 | 1 | 0 | 2.974161  | 4.088261  | -3.016831 |
| 51 | 1 | 0 | 2.870734  | 6.185115  | -1.682796 |
| 52 | 6 | 0 | 4.158271  | -0.901845 | 0.953287  |
| 53 | 6 | 0 | 4.512344  | -2.231759 | 1.198918  |
| 54 | 6 | 0 | 5.110014  | 0.111157  | 1.103133  |
| 55 | 6 | 0 | 5.810212  | -2.546367 | 1.592471  |
| 56 | 1 | 0 | 3.759790  | -3.005009 | 1.075732  |
| 57 | 6 | 0 | 6.407402  | -0.205055 | 1.497056  |
| 58 | 1 | 0 | 4.816035  | 1.138437  | 0.908441  |
| 59 | 6 | 0 | 6.758851  | -1.533501 | 1.742174  |
| 60 | 1 | 0 | 6.084628  | -3.580696 | 1.783201  |
| 61 | 1 | 0 | 7.146720  | 0.583033  | 1.614474  |
| 62 | 1 | 0 | 7.772088  | -1.779470 | 2.049923  |
| 63 | 6 | 0 | -2.268766 | 0.411977  | -2.600975 |
| 64 | 1 | 0 | -3.051672 | 0.534398  | -3.357637 |
| 65 | 1 | 0 | -1.462450 | -0.152808 | -3.083209 |
| 66 | 1 | 0 | -1.133793 | 2.200612  | -3.026068 |
| 67 | 1 | 0 | -2.597805 | 2.494510  | -2.101401 |
| 68 | 6 | 0 | 2.770075  | -0.564285 | 0.533474  |
| 69 | 8 | 0 | 2.456690  | 0.643715  | 0.296242  |
| 70 | 8 | 0 | 1.904569  | -1.492491 | 0.413380  |

-----

SCF Done: E(RPBE1PBE) = -6832.85317999 A.U. after 1 cycles  
 Convg = 0.3001D-08 -V/T = 2.0049

Zero-point correction= 0.562538 (Hartree/Particle)  
 Thermal correction to Energy= 0.606684  
 Thermal correction to Enthalpy= 0.607739  
 Thermal correction to Gibbs Free Energy= 0.475426  
 Sum of electronic and zero-point Energies= -6832.290642  
 Sum of electronic and thermal Energies= -6832.246496  
 Sum of electronic and thermal Enthalpies= -6832.245441  
 Sum of electronic and thermal Free Energies= -6832.377754

|                | 1       | 2       | 3       |
|----------------|---------|---------|---------|
|                | A       | A       | A       |
| Frequencies -- | 11.8767 | 16.3803 | 23.3084 |

**anti-pathway**  
**DPPP-Rh-Ph-O=C=O-conf1 (11)**

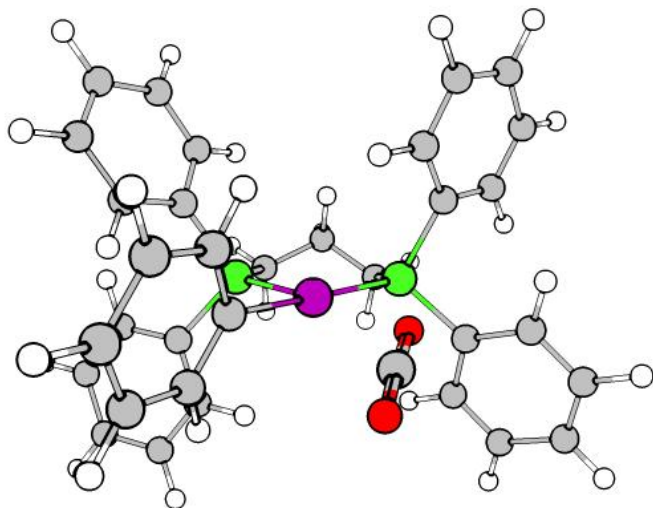

| Center Number | Atomic Number | Atomic Type | Coordinates (Angstroms) |           |           |
|---------------|---------------|-------------|-------------------------|-----------|-----------|
|               |               |             | X                       | Y         | Z         |
| 1             | 45            | 0           | 0.081789                | -0.429064 | 0.371958  |
| 2             | 15            | 0           | -1.359406               | 0.546917  | -0.990382 |
| 3             | 15            | 0           | 2.022137                | 0.298439  | -0.709264 |
| 4             | 6             | 0           | 1.842421                | 0.997143  | -2.409155 |
| 5             | 6             | 0           | -0.694536               | 1.343489  | -2.536530 |
| 6             | 1             | 0           | 1.661009                | 0.175499  | -3.110183 |
| 7             | 1             | 0           | 2.782583                | 1.473538  | -2.705625 |
| 8             | 6             | 0           | 3.322232                | -0.985451 | -0.908729 |
| 9             | 6             | 0           | 3.212145                | -1.937847 | -1.931146 |
| 10            | 6             | 0           | 4.354784                | -1.126021 | 0.027162  |
| 11            | 6             | 0           | 4.128634                | -2.981566 | -2.035134 |
| 12            | 1             | 0           | 2.399519                | -1.878618 | -2.651085 |
| 13            | 6             | 0           | 5.268379                | -2.173890 | -0.073448 |
| 14            | 1             | 0           | 4.449591                | -0.412849 | 0.841924  |
| 15            | 6             | 0           | 5.162889                | -3.102364 | -1.107467 |
| 16            | 1             | 0           | 4.030180                | -3.705638 | -2.839949 |
| 17            | 1             | 0           | 6.065198                | -2.263244 | 0.660685  |
| 18            | 1             | 0           | 5.876935                | -3.917788 | -1.186841 |
| 19            | 6             | 0           | 2.909391                | 1.675220  | 0.128928  |
| 20            | 6             | 0           | 4.136944                | 2.172808  | -0.329791 |
| 21            | 6             | 0           | 2.311357                | 2.271961  | 1.243445  |
| 22            | 6             | 0           | 4.751293                | 3.243311  | 0.313356  |
| 23            | 1             | 0           | 4.625541                | 1.714129  | -1.186959 |
| 24            | 6             | 0           | 2.925340                | 3.346319  | 1.888593  |
| 25            | 1             | 0           | 1.353815                | 1.890780  | 1.594984  |
| 26            | 6             | 0           | 4.144963                | 3.833153  | 1.424481  |
| 27            | 1             | 0           | 5.704650                | 3.618111  | -0.050494 |
| 28            | 1             | 0           | 2.448394                | 3.802067  | 2.752470  |
| 29            | 1             | 0           | 4.625017                | 4.669678  | 1.925775  |
| 30            | 6             | 0           | -2.611847               | -0.527005 | -1.809279 |
| 31            | 6             | 0           | -2.239460               | -1.840498 | -2.117821 |
| 32            | 6             | 0           | -3.858903               | -0.059782 | -2.237791 |
| 33            | 6             | 0           | -3.093685               | -2.671113 | -2.839806 |
| 34            | 1             | 0           | -1.270581               | -2.205701 | -1.779781 |
| 35            | 6             | 0           | -4.719295               | -0.894071 | -2.950219 |
| 36            | 1             | 0           | -4.167108               | 0.958138  | -2.012852 |
| 37            | 6             | 0           | -4.339222               | -2.200479 | -3.254344 |

|    |   |   |           |           |           |
|----|---|---|-----------|-----------|-----------|
| 38 | 1 | 0 | -2.790881 | -3.689801 | -3.069166 |
| 39 | 1 | 0 | -5.688806 | -0.520075 | -3.269722 |
| 40 | 1 | 0 | -5.012108 | -2.849582 | -3.808773 |
| 41 | 6 | 0 | -2.375174 | 1.880276  | -0.236056 |
| 42 | 6 | 0 | -3.422899 | 1.542653  | 0.633145  |
| 43 | 6 | 0 | -2.092620 | 3.234955  | -0.448554 |
| 44 | 6 | 0 | -4.175562 | 2.534496  | 1.255315  |
| 45 | 1 | 0 | -3.652653 | 0.498378  | 0.825204  |
| 46 | 6 | 0 | -2.839633 | 4.228216  | 0.184673  |
| 47 | 1 | 0 | -1.284268 | 3.534373  | -1.109458 |
| 48 | 6 | 0 | -3.886142 | 3.881740  | 1.036311  |
| 49 | 1 | 0 | -4.988324 | 2.250779  | 1.919029  |
| 50 | 1 | 0 | -2.602631 | 5.274189  | 0.006719  |
| 51 | 1 | 0 | -4.471633 | 4.655084  | 1.526821  |
| 52 | 6 | 0 | -1.488308 | -1.081887 | 1.530504  |
| 53 | 6 | 0 | -2.201727 | -2.280064 | 1.345324  |
| 54 | 6 | 0 | -1.697199 | -0.413991 | 2.755634  |
| 55 | 6 | 0 | -3.059710 | -2.791802 | 2.324031  |
| 56 | 1 | 0 | -2.095744 | -2.834201 | 0.414676  |
| 57 | 6 | 0 | -2.549500 | -0.917660 | 3.740925  |
| 58 | 1 | 0 | -1.190969 | 0.532971  | 2.945075  |
| 59 | 6 | 0 | -3.238204 | -2.113307 | 3.528740  |
| 60 | 1 | 0 | -3.592214 | -3.723736 | 2.141839  |
| 61 | 1 | 0 | -2.681618 | -0.372133 | 4.673912  |
| 62 | 1 | 0 | -3.906423 | -2.507886 | 4.290698  |
| 63 | 6 | 0 | 0.686683  | 1.998718  | -2.475860 |
| 64 | 1 | 0 | 0.808699  | 2.599182  | -3.385249 |
| 65 | 1 | 0 | 0.756789  | 2.703500  | -1.638538 |
| 66 | 1 | 0 | -1.445994 | 2.061064  | -2.886721 |
| 67 | 1 | 0 | -0.674468 | 0.541931  | -3.283757 |
| 68 | 8 | 0 | 1.451204  | -1.632182 | 2.015303  |
| 69 | 6 | 0 | 1.020949  | -2.450544 | 2.737375  |
| 70 | 8 | 0 | 0.641093  | -3.274728 | 3.463578  |

```

-----
SCF Done: E(RPBE1PBE) = -6832.80255545 A.U. after 1 cycles
          Convg = 0.7257D-08 -V/T = 2.0050
Zero-point correction= 0.559538 (Hartree/Particle)
Thermal correction to Energy= 0.605300
Thermal correction to Enthalpy= 0.606355
Thermal correction to Gibbs Free Energy= 0.470142
Sum of electronic and zero-point Energies= -6832.243018
Sum of electronic and thermal Energies= -6832.197255
Sum of electronic and thermal Enthalpies= -6832.196200
Sum of electronic and thermal Free Energies= -6832.332414

          1          2          3
          A          A          A
Frequencies -- 11.6072 19.6730 22.1158

```

DPPP-Rh-Ph-CO<sub>2</sub> (12)

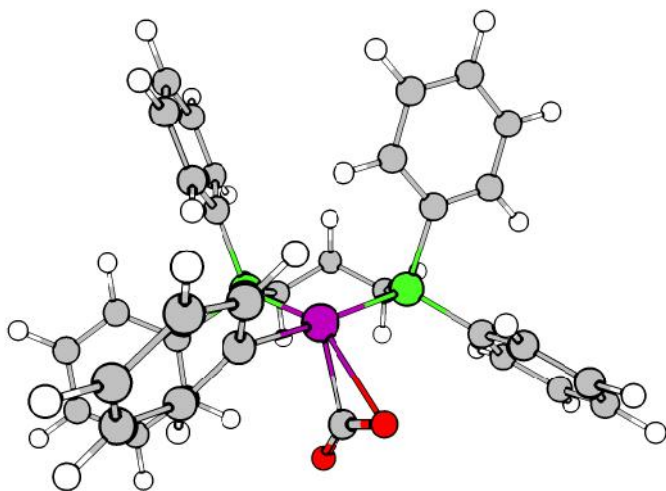

| Center Number | Atomic Number | Atomic Type | Coordinates (Angstroms) |           |           |
|---------------|---------------|-------------|-------------------------|-----------|-----------|
|               |               |             | X                       | Y         | Z         |
| 1             | 45            | 0           | 0.041133                | -0.707516 | 0.504077  |
| 2             | 15            | 0           | -1.313868               | 0.406049  | -0.922893 |
| 3             | 15            | 0           | 2.077392                | 0.050135  | -0.549874 |
| 4             | 6             | 0           | 1.967407                | 0.473527  | -2.338700 |
| 5             | 6             | 0           | -0.583121               | 0.689743  | -2.594375 |
| 6             | 1             | 0           | 1.872642                | -0.465818 | -2.895654 |
| 7             | 1             | 0           | 2.900101                | 0.956836  | -2.650718 |
| 8             | 6             | 0           | 3.522966                | -1.063730 | -0.441491 |
| 9             | 6             | 0           | 4.286765                | -1.451569 | -1.547469 |
| 10            | 6             | 0           | 3.864768                | -1.555120 | 0.825572  |
| 11            | 6             | 0           | 5.378239                | -2.305249 | -1.387542 |
| 12            | 1             | 0           | 4.043519                | -1.094627 | -2.543799 |
| 13            | 6             | 0           | 4.959791                | -2.397403 | 0.985131  |
| 14            | 1             | 0           | 3.266698                | -1.284158 | 1.691813  |
| 15            | 6             | 0           | 5.719816                | -2.775669 | -0.122061 |
| 16            | 1             | 0           | 5.961225                | -2.600559 | -2.256031 |
| 17            | 1             | 0           | 5.211415                | -2.771124 | 1.973948  |
| 18            | 1             | 0           | 6.570123                | -3.441127 | 0.001114  |
| 19            | 6             | 0           | 2.713263                | 1.613970  | 0.174754  |
| 20            | 6             | 0           | 4.054739                | 1.997126  | 0.048264  |
| 21            | 6             | 0           | 1.825449                | 2.460296  | 0.847983  |
| 22            | 6             | 0           | 4.494224                | 3.207295  | 0.577805  |
| 23            | 1             | 0           | 4.763149                | 1.340868  | -0.451995 |
| 24            | 6             | 0           | 2.264783                | 3.674911  | 1.373844  |
| 25            | 1             | 0           | 0.782639                | 2.171084  | 0.961036  |
| 26            | 6             | 0           | 3.599682                | 4.049863  | 1.239743  |
| 27            | 1             | 0           | 5.538641                | 3.491575  | 0.478598  |
| 28            | 1             | 0           | 1.562654                | 4.322762  | 1.891984  |
| 29            | 1             | 0           | 3.945773                | 4.992820  | 1.654817  |
| 30            | 6             | 0           | -2.890178               | -0.381669 | -1.429657 |
| 31            | 6             | 0           | -2.831378               | -1.652779 | -2.017807 |
| 32            | 6             | 0           | -4.129254               | 0.247890  | -1.281127 |
| 33            | 6             | 0           | -3.995986               | -2.273202 | -2.462229 |
| 34            | 1             | 0           | -1.880625               | -2.175449 | -2.097994 |
| 35            | 6             | 0           | -5.293810               | -0.382127 | -1.719196 |
| 36            | 1             | 0           | -4.194801               | 1.229503  | -0.820494 |
| 37            | 6             | 0           | -5.230327               | -1.640145 | -2.313981 |
| 38            | 1             | 0           | -3.938179               | -3.260891 | -2.912169 |
| 39            | 1             | 0           | -6.252342               | 0.114625  | -1.592987 |

|    |   |   |           |           |           |
|----|---|---|-----------|-----------|-----------|
| 40 | 1 | 0 | -6.139213 | -2.129293 | -2.654546 |
| 41 | 6 | 0 | -1.818864 | 2.072043  | -0.342433 |
| 42 | 6 | 0 | -2.204347 | 2.213511  | 0.998260  |
| 43 | 6 | 0 | -1.838388 | 3.200086  | -1.171723 |
| 44 | 6 | 0 | -2.607012 | 3.451528  | 1.493528  |
| 45 | 1 | 0 | -2.200120 | 1.346483  | 1.654456  |
| 46 | 6 | 0 | -2.228803 | 4.441194  | -0.671087 |
| 47 | 1 | 0 | -1.553103 | 3.126946  | -2.216746 |
| 48 | 6 | 0 | -2.615067 | 4.570536  | 0.661596  |
| 49 | 1 | 0 | -2.912076 | 3.539693  | 2.532930  |
| 50 | 1 | 0 | -2.233098 | 5.307467  | -1.327416 |
| 51 | 1 | 0 | -2.922051 | 5.538348  | 1.049151  |
| 52 | 6 | 0 | -1.539844 | -1.237611 | 1.693500  |
| 53 | 6 | 0 | -2.625887 | -2.087223 | 1.456112  |
| 54 | 6 | 0 | -1.371887 | -0.746992 | 2.999995  |
| 55 | 6 | 0 | -3.510637 | -2.432666 | 2.481329  |
| 56 | 1 | 0 | -2.789127 | -2.499004 | 0.463527  |
| 57 | 6 | 0 | -2.257191 | -1.080304 | 4.027213  |
| 58 | 1 | 0 | -0.528869 | -0.094142 | 3.238112  |
| 59 | 6 | 0 | -3.335427 | -1.926993 | 3.768583  |
| 60 | 1 | 0 | -4.342272 | -3.102055 | 2.270357  |
| 61 | 1 | 0 | -2.100141 | -0.684710 | 5.028812  |
| 62 | 1 | 0 | -4.027184 | -2.194210 | 4.563820  |
| 63 | 6 | 0 | 0.779972  | 1.382648  | -2.659619 |
| 64 | 1 | 0 | 0.913538  | 1.748807  | -3.684098 |
| 65 | 1 | 0 | 0.800744  | 2.273813  | -2.021002 |
| 66 | 1 | 0 | -1.324067 | 1.236702  | -3.187933 |
| 67 | 1 | 0 | -0.517082 | -0.304509 | -3.051234 |
| 68 | 6 | 0 | 0.324200  | -2.642022 | -0.048504 |
| 69 | 8 | 0 | 0.952116  | -2.769421 | 1.007305  |
| 70 | 8 | 0 | -0.036405 | -3.221001 | -1.045665 |

```

-----
SCF Done: E(RPBE1PBE) = -6832.81587874 A.U. after 1 cycles
          Convg = 0.3841D-08 -V/T = 2.0050
Zero-point correction= 0.560023 (Hartree/Particle)
Thermal correction to Energy= 0.604951
Thermal correction to Enthalpy= 0.606006
Thermal correction to Gibbs Free Energy= 0.473833
Sum of electronic and zero-point Energies= -6832.255855
Sum of electronic and thermal Energies= -6832.210928
Sum of electronic and thermal Enthalpies= -6832.209873
Sum of electronic and thermal Free Energies= -6832.342046

          1          2          3
          A          A          A
Frequencies -- 16.5405 20.8018 24.9145

```

DPPP-Rh-Ph-CO<sub>2</sub>-TS2 (13)

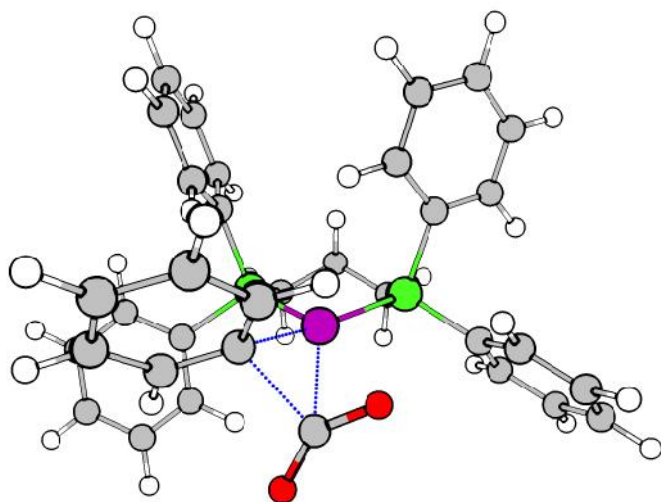

| Center Number | Atomic Number | Atomic Type | Coordinates (Angstroms) |           |           |
|---------------|---------------|-------------|-------------------------|-----------|-----------|
|               |               |             | X                       | Y         | Z         |
| 1             | 45            | 0           | 0.131509                | -0.776702 | 0.346261  |
| 2             | 15            | 0           | -1.240861               | 0.374108  | -1.030819 |
| 3             | 15            | 0           | 2.037133                | 0.095708  | -0.669291 |
| 4             | 6             | 0           | 1.968956                | 0.578111  | -2.443683 |
| 5             | 6             | 0           | -0.569123               | 0.775854  | -2.704241 |
| 6             | 1             | 0           | 1.889297                | -0.339249 | -3.038116 |
| 7             | 1             | 0           | 2.907508                | 1.074386  | -2.715154 |
| 8             | 6             | 0           | 3.500353                | -0.995297 | -0.553356 |
| 9             | 6             | 0           | 4.226207                | -1.433788 | -1.665989 |
| 10            | 6             | 0           | 3.889953                | -1.421184 | 0.723615  |
| 11            | 6             | 0           | 5.327267                | -2.274625 | -1.503409 |
| 12            | 1             | 0           | 3.947276                | -1.126131 | -2.669398 |
| 13            | 6             | 0           | 4.992959                | -2.252780 | 0.883994  |
| 14            | 1             | 0           | 3.323320                | -1.106752 | 1.595806  |
| 15            | 6             | 0           | 5.714784                | -2.683221 | -0.229620 |
| 16            | 1             | 0           | 5.882131                | -2.608141 | -2.376523 |
| 17            | 1             | 0           | 5.281947                | -2.575809 | 1.880487  |
| 18            | 1             | 0           | 6.572397                | -3.338889 | -0.104446 |
| 19            | 6             | 0           | 2.628499                | 1.646406  | 0.118080  |
| 20            | 6             | 0           | 3.924045                | 2.130909  | -0.105380 |
| 21            | 6             | 0           | 1.761142                | 2.373035  | 0.939668  |
| 22            | 6             | 0           | 4.338934                | 3.325277  | 0.476345  |
| 23            | 1             | 0           | 4.619070                | 1.565349  | -0.722437 |
| 24            | 6             | 0           | 2.176443                | 3.571777  | 1.519897  |
| 25            | 1             | 0           | 0.758698                | 1.994670  | 1.128159  |
| 26            | 6             | 0           | 3.464247                | 4.049359  | 1.288773  |
| 27            | 1             | 0           | 5.347920                | 3.689560  | 0.301028  |
| 28            | 1             | 0           | 1.492275                | 4.127335  | 2.155894  |
| 29            | 1             | 0           | 3.790719                | 4.980374  | 1.744847  |
| 30            | 6             | 0           | -2.758175               | -0.509315 | -1.568896 |
| 31            | 6             | 0           | -2.624421               | -1.843473 | -1.974905 |
| 32            | 6             | 0           | -4.012308               | 0.103621  | -1.636714 |
| 33            | 6             | 0           | -3.725847               | -2.547567 | -2.453702 |
| 34            | 1             | 0           | -1.661626               | -2.342949 | -1.883055 |
| 35            | 6             | 0           | -5.116375               | -0.607104 | -2.107814 |
| 36            | 1             | 0           | -4.136575               | 1.133360  | -1.311766 |
| 37            | 6             | 0           | -4.975590               | -1.930581 | -2.520635 |
| 38            | 1             | 0           | -3.610286               | -3.584764 | -2.756691 |
| 39            | 1             | 0           | -6.089054               | -0.123473 | -2.148454 |

|    |   |   |           |           |           |
|----|---|---|-----------|-----------|-----------|
| 40 | 1 | 0 | -5.837920 | -2.483367 | -2.884024 |
| 41 | 6 | 0 | -1.860434 | 1.977866  | -0.384950 |
| 42 | 6 | 0 | -2.257865 | 2.030041  | 0.958890  |
| 43 | 6 | 0 | -1.947631 | 3.141682  | -1.158492 |
| 44 | 6 | 0 | -2.743825 | 3.213562  | 1.508502  |
| 45 | 1 | 0 | -2.183773 | 1.139251  | 1.577833  |
| 46 | 6 | 0 | -2.420872 | 4.329990  | -0.602810 |
| 47 | 1 | 0 | -1.648637 | 3.139409  | -2.202373 |
| 48 | 6 | 0 | -2.823151 | 4.368462  | 0.730406  |
| 49 | 1 | 0 | -3.054535 | 3.232829  | 2.549819  |
| 50 | 1 | 0 | -2.475574 | 5.225615  | -1.216193 |
| 51 | 1 | 0 | -3.193889 | 5.294551  | 1.161915  |
| 52 | 6 | 0 | -1.369307 | -1.424440 | 1.727539  |
| 53 | 6 | 0 | -2.717073 | -1.750410 | 1.522161  |
| 54 | 6 | 0 | -0.990370 | -0.960639 | 2.999670  |
| 55 | 6 | 0 | -3.664637 | -1.551269 | 2.523322  |
| 56 | 1 | 0 | -3.026210 | -2.184221 | 0.576119  |
| 57 | 6 | 0 | -1.935976 | -0.752988 | 4.005270  |
| 58 | 1 | 0 | 0.059728  | -0.767055 | 3.210469  |
| 59 | 6 | 0 | -3.279489 | -1.039421 | 3.764622  |
| 60 | 1 | 0 | -4.706422 | -1.803450 | 2.338909  |
| 61 | 1 | 0 | -1.621339 | -0.383632 | 4.978830  |
| 62 | 1 | 0 | -4.019564 | -0.887964 | 4.546757  |
| 63 | 6 | 0 | 0.781657  | 1.490077  | -2.754879 |
| 64 | 1 | 0 | 0.917496  | 1.879929  | -3.770304 |
| 65 | 1 | 0 | 0.789974  | 2.364973  | -2.093695 |
| 66 | 1 | 0 | -1.331409 | 1.342228  | -3.250458 |
| 67 | 1 | 0 | -0.497080 | -0.190274 | -3.217707 |
| 68 | 6 | 0 | -0.088555 | -2.830753 | 1.010683  |
| 69 | 8 | 0 | 1.030429  | -2.468793 | 1.426367  |
| 70 | 8 | 0 | -0.684728 | -3.808256 | 0.641388  |

```

-----
SCF Done:  E(RPBE1PBE) = -6832.79896595      A.U. after 1 cycles
              Conv = 0.7670D-08              -V/T = 2.0050
Zero-point correction= 0.559659 (Hartree/Particle)
Thermal correction to Energy= 0.603715
Thermal correction to Enthalpy= 0.604770
Thermal correction to Gibbs Free Energy= 0.475628
Sum of electronic and zero-point Energies= -6832.239307
Sum of electronic and thermal Energies= -6832.195251
Sum of electronic and thermal Enthalpies= -6832.194196
Sum of electronic and thermal Free Energies= -6832.323338

              1              2              3
              A              A              A
Frequencies --  -286.4499          18.6753          22.5339

```

DPPP-Rh-OOCPh-conf1 (14)

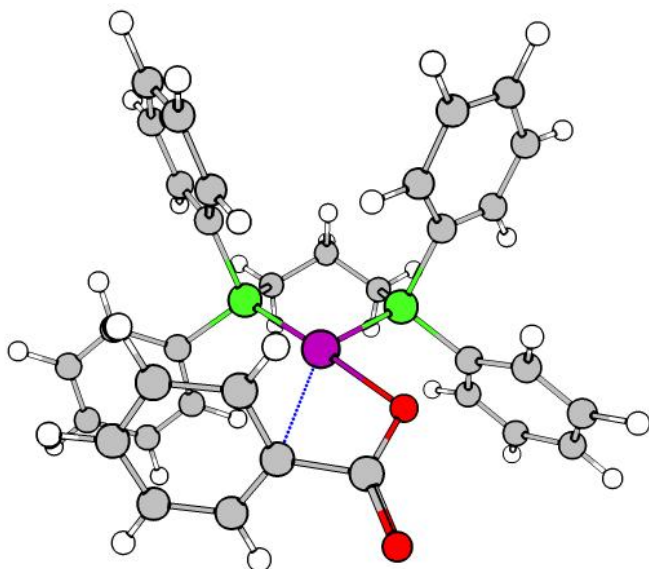

| Center Number | Atomic Number | Atomic Type | Coordinates (Angstroms) |           |           |
|---------------|---------------|-------------|-------------------------|-----------|-----------|
|               |               |             | X                       | Y         | Z         |
| 1             | 45            | 0           | -0.113284               | -0.575093 | -0.451653 |
| 2             | 15            | 0           | 1.404499                | 0.578467  | 0.778276  |
| 3             | 15            | 0           | -1.874592               | 0.251253  | 0.719486  |
| 4             | 6             | 0           | -1.618364               | 0.840491  | 2.445675  |
| 5             | 6             | 0           | 0.913463                | 1.092010  | 2.484941  |
| 6             | 1             | 0           | -1.443441               | -0.030727 | 3.085201  |
| 7             | 1             | 0           | -2.544319               | 1.314707  | 2.787705  |
| 8             | 6             | 0           | -3.252711               | -0.943630 | 0.870637  |
| 9             | 6             | 0           | -3.452376               | -1.712874 | 2.022630  |
| 10            | 6             | 0           | -4.087139               | -1.150760 | -0.235433 |
| 11            | 6             | 0           | -4.479812               | -2.653376 | 2.076090  |
| 12            | 1             | 0           | -2.810159               | -1.596144 | 2.890557  |
| 13            | 6             | 0           | -5.110596               | -2.091226 | -0.180204 |
| 14            | 1             | 0           | -3.930005               | -0.583850 | -1.147615 |
| 15            | 6             | 0           | -5.312783               | -2.843884 | 0.975857  |
| 16            | 1             | 0           | -4.624272               | -3.239946 | 2.979714  |
| 17            | 1             | 0           | -5.744041               | -2.244564 | -1.049665 |
| 18            | 1             | 0           | -6.110437               | -3.580958 | 1.016045  |
| 19            | 6             | 0           | -2.686102               | 1.712967  | -0.043113 |
| 20            | 6             | 0           | -3.896265               | 2.211045  | 0.458979  |
| 21            | 6             | 0           | -2.083352               | 2.356503  | -1.125633 |
| 22            | 6             | 0           | -4.483489               | 3.337578  | -0.108421 |
| 23            | 1             | 0           | -4.394333               | 1.707405  | 1.284663  |
| 24            | 6             | 0           | -2.671207               | 3.486079  | -1.695095 |
| 25            | 1             | 0           | -1.152364               | 1.958768  | -1.521314 |
| 26            | 6             | 0           | -3.869903               | 3.979054  | -1.186263 |
| 27            | 1             | 0           | -5.424356               | 3.712695  | 0.285889  |
| 28            | 1             | 0           | -2.192809               | 3.977233  | -2.538434 |
| 29            | 1             | 0           | -4.331371               | 4.857184  | -1.630409 |
| 30            | 6             | 0           | 2.947700                | -0.332681 | 1.192003  |
| 31            | 6             | 0           | 2.805162                | -1.568562 | 1.836735  |
| 32            | 6             | 0           | 4.233153                | 0.142363  | 0.916666  |
| 33            | 6             | 0           | 3.924666                | -2.297313 | 2.228569  |
| 34            | 1             | 0           | 1.810731                | -1.972745 | 2.017364  |
| 35            | 6             | 0           | 5.354652                | -0.594398 | 1.298746  |
| 36            | 1             | 0           | 4.367975                | 1.086369  | 0.396121  |



|    |   |   |           |           |           |
|----|---|---|-----------|-----------|-----------|
| 37 | 6 | 0 | 5.204603  | -1.810547 | 1.961745  |
| 38 | 1 | 0 | 3.796927  | -3.252186 | 2.731955  |
| 39 | 1 | 0 | 6.348278  | -0.213712 | 1.075871  |
| 40 | 1 | 0 | 6.079686  | -2.380760 | 2.262521  |
| 41 | 6 | 0 | 1.989695  | 2.160109  | 0.035865  |
| 42 | 6 | 0 | 1.739137  | 2.394725  | -1.320699 |
| 43 | 6 | 0 | 2.677391  | 3.139687  | 0.765762  |
| 44 | 6 | 0 | 2.164545  | 3.570720  | -1.936325 |
| 45 | 1 | 0 | 1.199743  | 1.645272  | -1.894051 |
| 46 | 6 | 0 | 3.098760  | 4.318579  | 0.154999  |
| 47 | 1 | 0 | 2.901766  | 2.990565  | 1.818233  |
| 48 | 6 | 0 | 2.843933  | 4.537489  | -1.198525 |
| 49 | 1 | 0 | 1.959572  | 3.732299  | -2.991491 |
| 50 | 1 | 0 | 3.629045  | 5.066766  | 0.738395  |
| 51 | 1 | 0 | 3.172306  | 5.458150  | -1.673527 |
| 52 | 6 | 0 | -0.436634 | 1.799364  | 2.582571  |
| 53 | 1 | 0 | -0.501113 | 2.276101  | 3.567215  |
| 54 | 1 | 0 | -0.506996 | 2.612018  | 1.849240  |
| 55 | 1 | 0 | 1.707633  | 1.715199  | 2.906625  |
| 56 | 1 | 0 | 0.898792  | 0.176283  | 3.087139  |
| 57 | 6 | 0 | -0.727545 | -2.722545 | -1.928394 |
| 58 | 8 | 0 | -1.464151 | -1.704370 | -1.615796 |
| 59 | 8 | 0 | -1.111922 | -3.826533 | -2.305922 |
| 60 | 6 | 0 | 0.750681  | -2.423909 | -1.780052 |
| 61 | 6 | 0 | 1.631664  | -3.378374 | -1.235813 |
| 62 | 6 | 0 | 1.275321  | -1.229930 | -2.321557 |
| 63 | 6 | 0 | 2.995215  | -3.146186 | -1.231251 |
| 64 | 1 | 0 | 1.218997  | -4.306413 | -0.850182 |
| 65 | 6 | 0 | 2.668929  | -1.018603 | -2.327930 |
| 66 | 1 | 0 | 0.626771  | -0.572009 | -2.899432 |
| 67 | 6 | 0 | 3.518596  | -1.964817 | -1.782960 |
| 68 | 1 | 0 | 3.669924  | -3.886004 | -0.808906 |
| 69 | 1 | 0 | 3.073435  | -0.117650 | -2.782090 |
| 70 | 1 | 0 | 4.592265  | -1.799612 | -1.786436 |

```

-----
SCF Done: E(RPBE1PBE) = -6832.83978814 A.U. after 1 cycles
          Conv = 0.1645D-08 -V/T = 2.0050
Zero-point correction= 0.562289 (Hartree/Particle)
Thermal correction to Energy= 0.605298
Thermal correction to Enthalpy= 0.606353
Thermal correction to Gibbs Free Energy= 0.480903
Sum of electronic and zero-point Energies= -6832.277499
Sum of electronic and thermal Energies= -6832.234490
Sum of electronic and thermal Enthalpies= -6832.233435
Sum of electronic and thermal Free Energies= -6832.358886

          1          2          3
          A          A          A
Frequencies -- -4.1075          19.8391          21.7526

```

DPPP-Rh-OOCPh-conf2 (15)

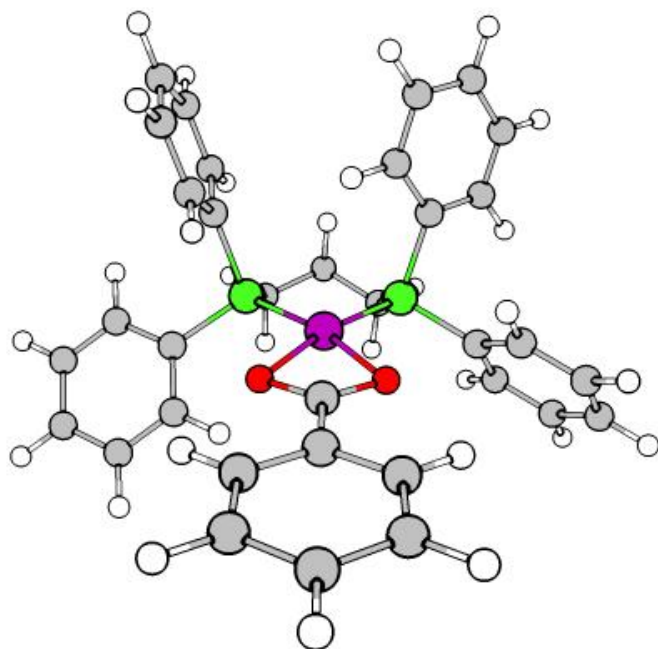

| Center Number | Atomic Number | Atomic Type | Coordinates (Angstroms) |           |           |
|---------------|---------------|-------------|-------------------------|-----------|-----------|
|               |               |             | X                       | Y         | Z         |
| 1             | 45            | 0           | 0.290521                | 0.250499  | -0.229054 |
| 2             | 15            | 0           | 0.060853                | -1.920714 | -0.682373 |
| 3             | 15            | 0           | -1.856152               | 0.645092  | -0.684503 |
| 4             | 6             | 0           | -2.681028               | -0.370781 | -1.982987 |
| 5             | 6             | 0           | -1.217005               | -2.473708 | -1.889104 |
| 6             | 1             | 0           | -2.188389               | -0.156498 | -2.938626 |
| 7             | 1             | 0           | -3.727810               | -0.057632 | -2.068184 |
| 8             | 6             | 0           | -2.158171               | 2.373420  | -1.213203 |
| 9             | 6             | 0           | -2.661393               | 2.716723  | -2.472404 |
| 10            | 6             | 0           | -1.832163               | 3.394185  | -0.309896 |
| 11            | 6             | 0           | -2.846857               | 4.055475  | -2.818409 |
| 12            | 1             | 0           | -2.917540               | 1.948571  | -3.195977 |
| 13            | 6             | 0           | -2.023751               | 4.727976  | -0.654470 |
| 14            | 1             | 0           | -1.417039               | 3.143528  | 0.662681  |
| 15            | 6             | 0           | -2.531616               | 5.063461  | -1.910427 |
| 16            | 1             | 0           | -3.240295               | 4.307850  | -3.799777 |
| 17            | 1             | 0           | -1.768298               | 5.508867  | 0.056583  |
| 18            | 1             | 0           | -2.676892               | 6.106145  | -2.180369 |
| 19            | 6             | 0           | -3.023883               | 0.461683  | 0.724257  |
| 20            | 6             | 0           | -4.339743               | 0.936819  | 0.643266  |
| 21            | 6             | 0           | -2.599098               | -0.176772 | 1.892998  |
| 22            | 6             | 0           | -5.217312               | 0.765593  | 1.709731  |
| 23            | 1             | 0           | -4.677518               | 1.458941  | -0.249597 |
| 24            | 6             | 0           | -3.479823               | -0.349506 | 2.961668  |
| 25            | 1             | 0           | -1.572621               | -0.531277 | 1.961254  |
| 26            | 6             | 0           | -4.788330               | 0.119723  | 2.871220  |
| 27            | 1             | 0           | -6.234725               | 1.141919  | 1.639146  |
| 28            | 1             | 0           | -3.138408               | -0.847471 | 3.865424  |
| 29            | 1             | 0           | -5.473541               | -0.010473 | 3.705012  |
| 30            | 6             | 0           | 1.565998                | -2.678925 | -1.412382 |
| 31            | 6             | 0           | 2.473572                | -1.865524 | -2.097489 |
| 32            | 6             | 0           | 1.793568                | -4.059135 | -1.349693 |
| 33            | 6             | 0           | 3.585510                | -2.427146 | -2.724154 |

|    |   |   |           |           |           |
|----|---|---|-----------|-----------|-----------|
| 34 | 1 | 0 | 2.313124  | -0.790483 | -2.123324 |
| 35 | 6 | 0 | 2.905391  | -4.617787 | -1.974741 |
| 36 | 1 | 0 | 1.108362  | -4.701488 | -0.801079 |
| 37 | 6 | 0 | 3.802180  | -3.802186 | -2.665680 |
| 38 | 1 | 0 | 4.287442  | -1.785928 | -3.250643 |
| 39 | 1 | 0 | 3.075245  | -5.689922 | -1.918197 |
| 40 | 1 | 0 | 4.671967  | -4.238558 | -3.150079 |
| 41 | 6 | 0 | -0.214847 | -2.943219 | 0.816896  |
| 42 | 6 | 0 | 0.636942  | -2.701920 | 1.905422  |
| 43 | 6 | 0 | -1.219294 | -3.906937 | 0.945273  |
| 44 | 6 | 0 | 0.495142  | -3.421843 | 3.087103  |
| 45 | 1 | 0 | 1.410713  | -1.941067 | 1.822763  |
| 46 | 6 | 0 | -1.369041 | -4.619729 | 2.136214  |
| 47 | 1 | 0 | -1.899310 | -4.113704 | 0.123650  |
| 48 | 6 | 0 | -0.511376 | -4.382380 | 3.206944  |
| 49 | 1 | 0 | 1.166801  | -3.228360 | 3.919329  |
| 50 | 1 | 0 | -2.158625 | -5.361670 | 2.223020  |
| 51 | 1 | 0 | -0.627473 | -4.939419 | 4.132901  |
| 52 | 6 | 0 | -2.611056 | -1.872904 | -1.698172 |
| 53 | 1 | 0 | -3.291643 | -2.378675 | -2.392957 |
| 54 | 1 | 0 | -2.996431 | -2.082317 | -0.693199 |
| 55 | 1 | 0 | -1.259714 | -3.568783 | -1.892616 |
| 56 | 1 | 0 | -0.821053 | -2.182378 | -2.869383 |
| 57 | 6 | 0 | 2.257373  | 1.650368  | 0.523381  |
| 58 | 8 | 0 | 1.120509  | 2.198098  | 0.362173  |
| 59 | 8 | 0 | 2.407415  | 0.404749  | 0.310351  |
| 60 | 6 | 0 | 3.415774  | 2.475016  | 0.966329  |
| 61 | 6 | 0 | 4.666921  | 1.879371  | 1.153852  |
| 62 | 6 | 0 | 3.255813  | 3.845255  | 1.194251  |
| 63 | 6 | 0 | 5.751233  | 2.648903  | 1.567681  |
| 64 | 1 | 0 | 4.772915  | 0.814224  | 0.970381  |
| 65 | 6 | 0 | 4.341430  | 4.613551  | 1.607707  |
| 66 | 1 | 0 | 2.277697  | 4.291537  | 1.041134  |
| 67 | 6 | 0 | 5.589081  | 4.016683  | 1.795133  |
| 68 | 1 | 0 | 6.723048  | 2.184677  | 1.712799  |
| 69 | 1 | 0 | 4.216079  | 5.678777  | 1.783928  |
| 70 | 1 | 0 | 6.435737  | 4.617354  | 2.117705  |

```

-----
SCF Done: E(RPBE1PBE) = -6832.85652132 A.U. after 1 cycles
          Convg = 0.4032D-08 -V/T = 2.0049
Zero-point correction= 0.562463 (Hartree/Particle)
Thermal correction to Energy= 0.606653
Thermal correction to Enthalpy= 0.607708
Thermal correction to Gibbs Free Energy= 0.473235
Sum of electronic and zero-point Energies= -6832.294058
Sum of electronic and thermal Energies= -6832.249868
Sum of electronic and thermal Enthalpies= -6832.248813
Sum of electronic and thermal Free Energies= -6832.383286

          1          2          3
          A          A          A
Frequencies -- 3.0884 17.5704 18.5238

```

DPPP-Rh-(*p*-MeOPh) (16)

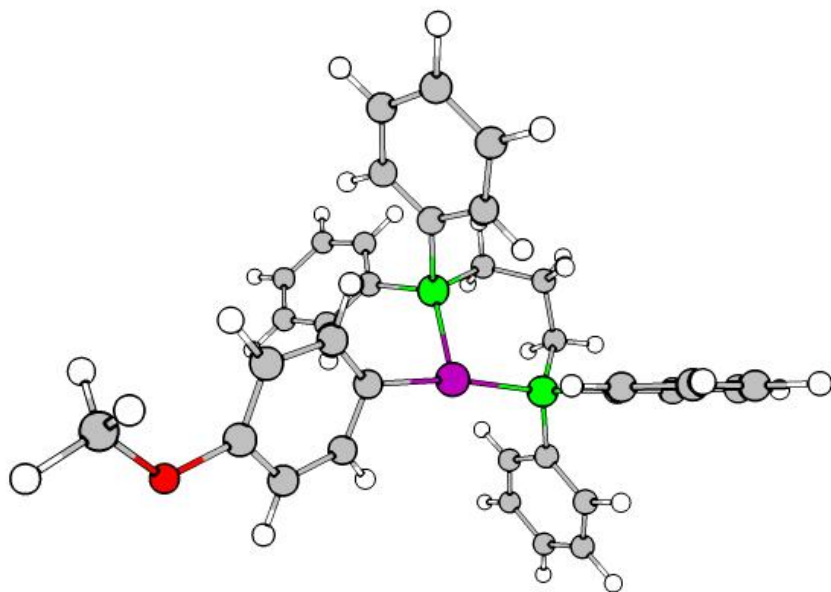

| Center Number | Atomic Number | Atomic Type | Coordinates (Angstroms) |           |           |
|---------------|---------------|-------------|-------------------------|-----------|-----------|
|               |               |             | X                       | Y         | Z         |
| 1             | 45            | 0           | 0.166291                | 0.539532  | -0.005158 |
| 2             | 15            | 0           | -0.807854               | -1.311186 | 0.700333  |
| 3             | 15            | 0           | 2.382398                | -0.161691 | 0.270733  |
| 4             | 6             | 0           | 2.654722                | -1.739448 | 1.189996  |
| 5             | 6             | 0           | 0.274908                | -2.678460 | 1.366020  |
| 6             | 1             | 0           | 2.532549                | -1.528853 | 2.258008  |
| 7             | 1             | 0           | 3.686428                | -2.077316 | 1.050555  |
| 8             | 6             | 0           | 3.467242                | 1.018122  | 1.173492  |
| 9             | 6             | 0           | 3.177034                | 1.275563  | 2.521933  |
| 10            | 6             | 0           | 4.492935                | 1.743988  | 0.557977  |
| 11            | 6             | 0           | 3.917584                | 2.206749  | 3.244231  |
| 12            | 1             | 0           | 2.354688                | 0.755801  | 3.009779  |
| 13            | 6             | 0           | 5.227561                | 2.685328  | 1.279797  |
| 14            | 1             | 0           | 4.722373                | 1.580347  | -0.491444 |
| 15            | 6             | 0           | 4.948381                | 2.914825  | 2.624903  |
| 16            | 1             | 0           | 3.681826                | 2.388199  | 4.289732  |
| 17            | 1             | 0           | 6.020802                | 3.240322  | 0.785302  |
| 18            | 1             | 0           | 5.522965                | 3.646823  | 3.186275  |
| 19            | 6             | 0           | 3.286819                | -0.477760 | -1.300518 |
| 20            | 6             | 0           | 4.579318                | -1.018218 | -1.347192 |
| 21            | 6             | 0           | 2.643409                | -0.170468 | -2.504697 |
| 22            | 6             | 0           | 5.209669                | -1.246701 | -2.567538 |
| 23            | 1             | 0           | 5.109469                | -1.253085 | -0.427101 |
| 24            | 6             | 0           | 3.273878                | -0.395826 | -3.728674 |
| 25            | 1             | 0           | 1.635441                | 0.241430  | -2.478276 |
| 26            | 6             | 0           | 4.557144                | -0.936511 | -3.761900 |
| 27            | 1             | 0           | 6.212832                | -1.664936 | -2.587136 |
| 28            | 1             | 0           | 2.759553                | -0.150354 | -4.654164 |
| 29            | 1             | 0           | 5.049967                | -1.115764 | -4.713923 |
| 30            | 6             | 0           | -2.032941               | -1.195830 | 2.074955  |
| 31            | 6             | 0           | -2.538138               | 0.053918  | 2.445794  |
| 32            | 6             | 0           | -2.455562               | -2.328598 | 2.788277  |
| 33            | 6             | 0           | -3.449835               | 0.171532  | 3.494633  |
| 34            | 1             | 0           | -2.211682               | 0.934998  | 1.900205  |
| 35            | 6             | 0           | -3.362157               | -2.211431 | 3.839290  |

|    |   |   |           |           |           |
|----|---|---|-----------|-----------|-----------|
| 36 | 1 | 0 | -2.085467 | -3.316213 | 2.526616  |
| 37 | 6 | 0 | -3.863304 | -0.959199 | 4.195210  |
| 38 | 1 | 0 | -3.833421 | 1.152134  | 3.764410  |
| 39 | 1 | 0 | -3.678132 | -3.100559 | 4.379260  |
| 40 | 1 | 0 | -4.570588 | -0.867682 | 5.015586  |
| 41 | 6 | 0 | -1.717103 | -2.218496 | -0.626480 |
| 42 | 6 | 0 | -3.015408 | -2.720228 | -0.485893 |
| 43 | 6 | 0 | -1.055475 | -2.401837 | -1.849236 |
| 44 | 6 | 0 | -3.629682 | -3.403858 | -1.536216 |
| 45 | 1 | 0 | -3.564981 | -2.564925 | 0.438091  |
| 46 | 6 | 0 | -1.660991 | -3.100105 | -2.890351 |
| 47 | 1 | 0 | -0.068447 | -1.966317 | -1.992515 |
| 48 | 6 | 0 | -2.952925 | -3.604577 | -2.736956 |
| 49 | 1 | 0 | -4.644001 | -3.775382 | -1.413145 |
| 50 | 1 | 0 | -1.129855 | -3.234639 | -3.829326 |
| 51 | 1 | 0 | -3.433064 | -4.137589 | -3.553523 |
| 52 | 6 | 0 | -1.585065 | 1.454983  | -0.449573 |
| 53 | 6 | 0 | -1.481141 | 2.818590  | -0.098520 |
| 54 | 6 | 0 | -2.671822 | 1.105568  | -1.259846 |
| 55 | 6 | 0 | -2.382176 | 3.777381  | -0.552349 |
| 56 | 1 | 0 | -0.671668 | 3.154948  | 0.555194  |
| 57 | 6 | 0 | -3.593641 | 2.052280  | -1.725469 |
| 58 | 1 | 0 | -2.815880 | 0.069154  | -1.559286 |
| 59 | 6 | 0 | -3.449385 | 3.395515  | -1.372856 |
| 60 | 1 | 0 | -2.282797 | 4.824566  | -0.275239 |
| 61 | 1 | 0 | -4.411013 | 1.725504  | -2.361585 |
| 62 | 6 | 0 | 1.668553  | -2.825482 | 0.754819  |
| 63 | 1 | 0 | 2.065927  | -3.795008 | 1.077957  |
| 64 | 1 | 0 | 1.612543  | -2.879003 | -0.339422 |
| 65 | 1 | 0 | -0.270594 | -3.619710 | 1.238648  |
| 66 | 1 | 0 | 0.371813  | -2.505292 | 2.444302  |
| 67 | 8 | 0 | -4.291327 | 4.399821  | -1.768403 |
| 68 | 6 | 0 | -5.383771 | 4.046575  | -2.591559 |
| 69 | 1 | 0 | -6.055026 | 3.338388  | -2.090491 |
| 70 | 1 | 0 | -5.925056 | 4.972524  | -2.789491 |
| 71 | 1 | 0 | -5.049949 | 3.615823  | -3.543551 |

-----

SCF Done: E(RPBE1PBE) = -6758.79559746 A.U. after 1 cycles  
 Convg = 0.2738D-08 -V/T = 2.0049  
 Zero-point correction= 0.579678 (Hartree/Particle)  
 Thermal correction to Energy= 0.623861  
 Thermal correction to Enthalpy= 0.624916  
 Thermal correction to Gibbs Free Energy= 0.493525  
 Sum of electronic and zero-point Energies= -6758.215919  
 Sum of electronic and thermal Energies= -6758.171737  
 Sum of electronic and thermal Enthalpies= -6758.170682  
 Sum of electronic and thermal Free Energies= -6758.302072

|                | 1       | 2       | 3       |
|----------------|---------|---------|---------|
|                | A       | A       | A       |
| Frequencies -- | 13.9620 | 17.7490 | 23.2419 |

DPPP-Rh-(*p*-MeOPh)-CO<sub>2</sub> (17)

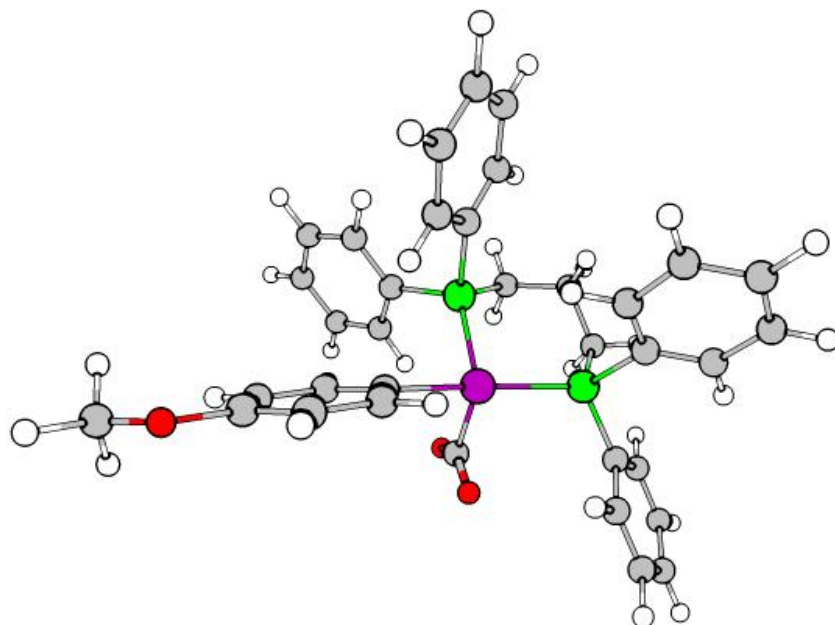

| Center Number | Atomic Number | Atomic Type | Coordinates (Angstroms) |           |           |
|---------------|---------------|-------------|-------------------------|-----------|-----------|
|               |               |             | X                       | Y         | Z         |
| 1             | 45            | 0           | -0.127817               | -0.689085 | -0.106677 |
| 2             | 15            | 0           | 0.772874                | 1.017286  | 1.070751  |
| 3             | 15            | 0           | -2.402085               | -0.054853 | 0.379527  |
| 4             | 6             | 0           | -2.687682               | 0.867865  | 1.947010  |
| 5             | 6             | 0           | -0.283969               | 1.625273  | 2.457542  |
| 6             | 1             | 0           | -2.567642               | 0.160887  | 2.776207  |
| 7             | 1             | 0           | -3.719924               | 1.235117  | 1.964897  |
| 8             | 6             | 0           | -3.642622               | -1.397040 | 0.413752  |
| 9             | 6             | 0           | -4.548671               | -1.592788 | 1.461346  |
| 10            | 6             | 0           | -3.662732               | -2.278349 | -0.675399 |
| 11            | 6             | 0           | -5.466039               | -2.642725 | 1.413849  |
| 12            | 1             | 0           | -4.551081               | -0.933218 | 2.324252  |
| 13            | 6             | 0           | -4.584669               | -3.318148 | -0.726427 |
| 14            | 1             | 0           | -2.946175               | -2.157088 | -1.483673 |
| 15            | 6             | 0           | -5.488899               | -3.504020 | 0.319640  |
| 16            | 1             | 0           | -6.162394               | -2.785419 | 2.236073  |
| 17            | 1             | 0           | -4.586859               | -3.994140 | -1.577197 |
| 18            | 1             | 0           | -6.202889               | -4.322611 | 0.284990  |
| 19            | 6             | 0           | -3.090750               | 1.100727  | -0.872477 |
| 20            | 6             | 0           | -4.470451               | 1.291950  | -1.022180 |
| 21            | 6             | 0           | -2.212385               | 1.829463  | -1.681578 |
| 22            | 6             | 0           | -4.958291               | 2.200249  | -1.957543 |
| 23            | 1             | 0           | -5.168205               | 0.718160  | -0.416402 |
| 24            | 6             | 0           | -2.701000               | 2.742277  | -2.616058 |
| 25            | 1             | 0           | -1.138257               | 1.686691  | -1.581692 |
| 26            | 6             | 0           | -4.074313               | 2.928718  | -2.755350 |
| 27            | 1             | 0           | -6.030991               | 2.336276  | -2.068523 |
| 28            | 1             | 0           | -2.005732               | 3.302285  | -3.235854 |
| 29            | 1             | 0           | -4.457743               | 3.634941  | -3.487115 |
| 30            | 6             | 0           | 2.320910                | 0.726262  | 2.008157  |
| 31            | 6             | 0           | 2.341305                | -0.334314 | 2.924559  |
| 32            | 6             | 0           | 3.450996                | 1.537272  | 1.871576  |
| 33            | 6             | 0           | 3.473070                | -0.565348 | 3.702176  |
| 34            | 1             | 0           | 1.486934                | -1.003555 | 3.005001  |

|    |   |   |           |           |           |
|----|---|---|-----------|-----------|-----------|
| 35 | 6 | 0 | 4.585394  | 1.295573  | 2.646352  |
| 36 | 1 | 0 | 3.454970  | 2.356969  | 1.158607  |
| 37 | 6 | 0 | 4.597774  | 0.248762  | 3.565576  |
| 38 | 1 | 0 | 3.479488  | -1.393647 | 4.405876  |
| 39 | 1 | 0 | 5.460508  | 1.929463  | 2.528577  |
| 40 | 1 | 0 | 5.482594  | 0.063029  | 4.168908  |
| 41 | 6 | 0 | 1.134941  | 2.507979  | 0.064543  |
| 42 | 6 | 0 | 1.727841  | 2.323296  | -1.192541 |
| 43 | 6 | 0 | 0.849023  | 3.810551  | 0.491251  |
| 44 | 6 | 0 | 2.033423  | 3.416879  | -1.999292 |
| 45 | 1 | 0 | 1.958900  | 1.317270  | -1.535268 |
| 46 | 6 | 0 | 1.143289  | 4.903014  | -0.323208 |
| 47 | 1 | 0 | 0.397435  | 3.991036  | 1.462049  |
| 48 | 6 | 0 | 1.736853  | 4.709805  | -1.569207 |
| 49 | 1 | 0 | 2.501220  | 3.255414  | -2.966907 |
| 50 | 1 | 0 | 0.910006  | 5.907268  | 0.020727  |
| 51 | 1 | 0 | 1.967500  | 5.563177  | -2.201404 |
| 52 | 6 | 0 | 1.698698  | -1.223704 | -0.866893 |
| 53 | 6 | 0 | 2.881050  | -1.661830 | -0.270688 |
| 54 | 6 | 0 | 1.654820  | -1.244499 | -2.274052 |
| 55 | 6 | 0 | 3.980675  | -2.092177 | -1.024932 |
| 56 | 1 | 0 | 2.972139  | -1.683694 | 0.811992  |
| 57 | 6 | 0 | 2.737106  | -1.657309 | -3.043785 |
| 58 | 1 | 0 | 0.749368  | -0.935557 | -2.801085 |
| 59 | 6 | 0 | 3.914564  | -2.082564 | -2.418291 |
| 60 | 1 | 0 | 2.687060  | -1.666322 | -4.130106 |
| 61 | 6 | 0 | -1.719150 | 2.038180  | 2.123979  |
| 62 | 1 | 0 | -2.087506 | 2.648453  | 2.956685  |
| 63 | 1 | 0 | -1.747539 | 2.689347  | 1.242318  |
| 64 | 1 | 0 | 0.252937  | 2.448254  | 2.942124  |
| 65 | 1 | 0 | -0.292403 | 0.808820  | 3.189174  |
| 66 | 6 | 0 | -0.233456 | -2.411439 | 0.965147  |
| 67 | 8 | 0 | -0.647502 | -2.941811 | -0.070553 |
| 68 | 8 | 0 | 0.026675  | -2.614425 | 2.127830  |
| 69 | 1 | 0 | 4.874318  | -2.428316 | -0.507778 |
| 70 | 8 | 0 | 4.929897  | -2.467349 | -3.249494 |
| 71 | 6 | 0 | 6.128904  | -2.912879 | -2.647921 |
| 72 | 1 | 0 | 5.963030  | -3.801698 | -2.027523 |
| 73 | 1 | 0 | 6.800732  | -3.169760 | -3.467611 |
| 74 | 1 | 0 | 6.590212  | -2.126587 | -2.038058 |

```

-----
SCF Done: E(RPBE1PBE) = -6947.22901206 A.U. after 1 cycles
          Convrg = 0.6687D-08 -V/T = 2.0051
Zero-point correction= 0.593324 (Hartree/Particle)
Thermal correction to Energy= 0.641291
Thermal correction to Enthalpy= 0.642346
Thermal correction to Gibbs Free Energy= 0.503435
Sum of electronic and zero-point Energies= -6946.635688
Sum of electronic and thermal Energies= -6946.587721
Sum of electronic and thermal Enthalpies= -6946.586666
Sum of electronic and thermal Free Energies= -6946.725577

          1          2          3
          A          A          A
Frequencies -- 15.4873 20.9635 22.8648

```

DPPP-Rh-(*p*-MeOPh)-CO<sub>2</sub>-TS2 (18)

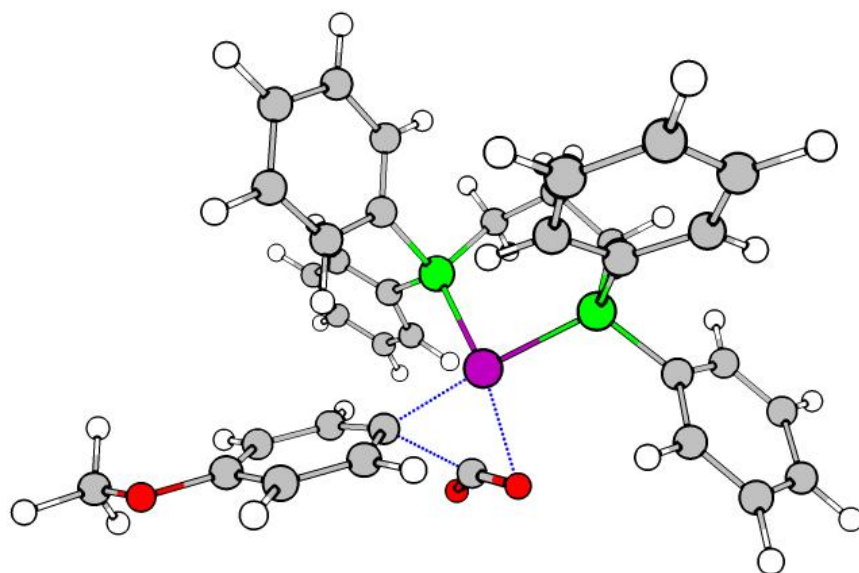

| Center Number | Atomic Number | Atomic Type | Coordinates (Angstroms) |           |           |
|---------------|---------------|-------------|-------------------------|-----------|-----------|
|               |               |             | X                       | Y         | Z         |
| 1             | 45            | 0           | -0.290423               | -0.748234 | -0.075582 |
| 2             | 15            | 0           | 0.732501                | 0.720493  | 1.300498  |
| 3             | 15            | 0           | -2.413775               | 0.091145  | 0.423206  |
| 4             | 6             | 0           | -2.700330               | 0.887981  | 2.058707  |
| 5             | 6             | 0           | -0.272964               | 1.348751  | 2.717488  |
| 6             | 1             | 0           | -2.678449               | 0.104397  | 2.824837  |
| 7             | 1             | 0           | -3.698695               | 1.339586  | 2.067240  |
| 8             | 6             | 0           | -3.765801               | -1.131345 | 0.272821  |
| 9             | 6             | 0           | -4.661364               | -1.421629 | 1.307380  |
| 10            | 6             | 0           | -3.884874               | -1.819411 | -0.942390 |
| 11            | 6             | 0           | -5.663576               | -2.374998 | 1.126974  |
| 12            | 1             | 0           | -4.592157               | -0.909772 | 2.262379  |
| 13            | 6             | 0           | -4.889567               | -2.763989 | -1.122784 |
| 14            | 1             | 0           | -3.184497               | -1.620152 | -1.748783 |
| 15            | 6             | 0           | -5.781809               | -3.045666 | -0.087876 |
| 16            | 1             | 0           | -6.352629               | -2.590719 | 1.939436  |
| 17            | 1             | 0           | -4.968309               | -3.290272 | -2.070257 |
| 18            | 1             | 0           | -6.562473               | -3.788855 | -0.227037 |
| 19            | 6             | 0           | -2.939928               | 1.419008  | -0.732922 |
| 20            | 6             | 0           | -4.282483               | 1.802234  | -0.848547 |
| 21            | 6             | 0           | -1.973284               | 2.082706  | -1.495227 |
| 22            | 6             | 0           | -4.647615               | 2.836953  | -1.704904 |
| 23            | 1             | 0           | -5.049431               | 1.280415  | -0.280167 |
| 24            | 6             | 0           | -2.339289               | 3.122054  | -2.350598 |
| 25            | 1             | 0           | -0.930760               | 1.779932  | -1.420181 |
| 26            | 6             | 0           | -3.675604               | 3.500459  | -2.456068 |
| 27            | 1             | 0           | -5.692697               | 3.122990  | -1.791535 |
| 28            | 1             | 0           | -1.578110               | 3.630624  | -2.936439 |
| 29            | 1             | 0           | -3.962953               | 4.306277  | -3.126491 |
| 30            | 6             | 0           | 2.148795                | 0.064628  | 2.266972  |
| 31            | 6             | 0           | 2.002849                | -1.202028 | 2.847439  |
| 32            | 6             | 0           | 3.321460                | 0.790310  | 2.493566  |
| 33            | 6             | 0           | 3.009440                | -1.727643 | 3.652901  |
| 34            | 1             | 0           | 1.112841                | -1.792529 | 2.637427  |
| 35            | 6             | 0           | 4.332652                | 0.257268  | 3.293343  |
| 36            | 1             | 0           | 3.455939                | 1.768956  | 2.040008  |



|    |   |   |           |           |           |
|----|---|---|-----------|-----------|-----------|
| 37 | 6 | 0 | 4.177704  | -0.998577 | 3.877474  |
| 38 | 1 | 0 | 2.887397  | -2.715153 | 4.089856  |
| 39 | 1 | 0 | 5.244101  | 0.826506  | 3.457597  |
| 40 | 1 | 0 | 4.968000  | -1.412422 | 4.498334  |
| 41 | 6 | 0 | 1.391400  | 2.237109  | 0.499181  |
| 42 | 6 | 0 | 2.035746  | 2.094167  | -0.738063 |
| 43 | 6 | 0 | 1.276689  | 3.517637  | 1.053793  |
| 44 | 6 | 0 | 2.566442  | 3.202378  | -1.393336 |
| 45 | 1 | 0 | 2.117165  | 1.109599  | -1.191671 |
| 46 | 6 | 0 | 1.795912  | 4.628698  | 0.389806  |
| 47 | 1 | 0 | 0.781548  | 3.667594  | 2.008323  |
| 48 | 6 | 0 | 2.445527  | 4.473878  | -0.832923 |
| 49 | 1 | 0 | 3.068920  | 3.070566  | -2.348030 |
| 50 | 1 | 0 | 1.691814  | 5.616072  | 0.832171  |
| 51 | 1 | 0 | 2.851597  | 5.340188  | -1.348570 |
| 52 | 6 | 0 | 1.482878  | -1.465243 | -1.009683 |
| 53 | 6 | 0 | 2.776625  | -1.655191 | -0.513895 |
| 54 | 6 | 0 | 1.354657  | -1.266425 | -2.399396 |
| 55 | 6 | 0 | 3.903087  | -1.582567 | -1.332521 |
| 56 | 1 | 0 | 2.919706  | -1.887517 | 0.537013  |
| 57 | 6 | 0 | 2.462157  | -1.181318 | -3.232777 |
| 58 | 1 | 0 | 0.364102  | -1.180707 | -2.842458 |
| 59 | 6 | 0 | 3.749248  | -1.329120 | -2.699906 |
| 60 | 1 | 0 | 4.885184  | -1.732890 | -0.895565 |
| 61 | 1 | 0 | 2.353459  | -1.020535 | -4.302460 |
| 62 | 6 | 0 | -1.641302 | 1.942567  | 2.381516  |
| 63 | 1 | 0 | -1.986754 | 2.508253  | 3.254490  |
| 64 | 1 | 0 | -1.566362 | 2.668278  | 1.562851  |
| 65 | 1 | 0 | 0.337484  | 2.064323  | 3.279173  |
| 66 | 1 | 0 | -0.396578 | 0.484231  | 3.380416  |
| 67 | 6 | 0 | 0.152531  | -2.853910 | -0.280577 |
| 68 | 8 | 0 | -0.865273 | -2.674349 | -0.977536 |
| 69 | 8 | 0 | 0.710510  | -3.689639 | 0.381021  |
| 70 | 8 | 0 | 4.776720  | -1.231119 | -3.586438 |
| 71 | 6 | 0 | 6.092202  | -1.410978 | -3.093562 |
| 72 | 1 | 0 | 6.226297  | -2.410724 | -2.665260 |
| 73 | 1 | 0 | 6.752331  | -1.297815 | -3.953674 |
| 74 | 1 | 0 | 6.346168  | -0.654412 | -2.342123 |

```

-----
SCF Done: E(RPBE1PBE) = -6947.21397238 A.U. after 1 cycles
          Conv = 0.4344D-08 -V/T = 2.0051
Zero-point correction= 0.592662 (Hartree/Particle)
Thermal correction to Energy= 0.639813
Thermal correction to Enthalpy= 0.640868
Thermal correction to Gibbs Free Energy= 0.505021
Sum of electronic and zero-point Energies= -6946.621311
Sum of electronic and thermal Energies= -6946.574159
Sum of electronic and thermal Enthalpies= -6946.573104
Sum of electronic and thermal Free Energies= -6946.708952

          1          2          3
          A          A          A
Frequencies -- -277.5621 16.6261 24.4423

```

DPPP-Rh-OOC(*p*-MeOPh)-conf2 (19)

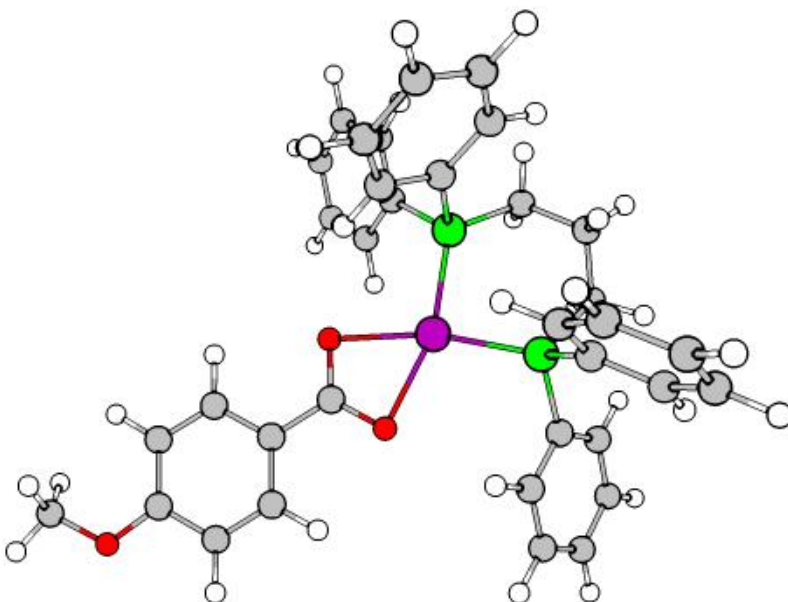

| Center Number | Atomic Number | Atomic Type | Coordinates (Angstroms) |           |           |
|---------------|---------------|-------------|-------------------------|-----------|-----------|
|               |               |             | X                       | Y         | Z         |
| 1             | 45            | 0           | 0.099003                | -0.081971 | -0.332371 |
| 2             | 15            | 0           | 1.311548                | 1.764376  | -0.619445 |
| 3             | 15            | 0           | 1.894248                | -1.395853 | -0.550710 |
| 4             | 6             | 0           | 3.296516                | -0.827813 | -1.602869 |
| 5             | 6             | 0           | 2.891537                | 1.702456  | -1.564597 |
| 6             | 1             | 0           | 2.944581                | -0.798360 | -2.640814 |
| 7             | 1             | 0           | 4.104642                | -1.565192 | -1.542086 |
| 8             | 6             | 0           | 1.496431                | -3.058450 | -1.212222 |
| 9             | 6             | 0           | 2.114017                | -3.613607 | -2.338250 |
| 10            | 6             | 0           | 0.504630                | -3.794220 | -0.548928 |
| 11            | 6             | 0           | 1.754287                | -4.884644 | -2.787184 |
| 12            | 1             | 0           | 2.880763                | -3.065635 | -2.878079 |
| 13            | 6             | 0           | 0.153543                | -5.064641 | -0.993775 |
| 14            | 1             | 0           | -0.005119               | -3.363889 | 0.308649  |
| 15            | 6             | 0           | 0.776802                | -5.614261 | -2.114677 |
| 16            | 1             | 0           | 2.242335                | -5.303186 | -3.663698 |
| 17            | 1             | 0           | -0.616537               | -5.623791 | -0.468785 |
| 18            | 1             | 0           | 0.498070                | -6.604828 | -2.464547 |
| 19            | 6             | 0           | 2.760045                | -1.795927 | 1.023425  |
| 20            | 6             | 0           | 3.684759                | -2.845457 | 1.104807  |
| 21            | 6             | 0           | 2.508149                | -1.019250 | 2.158491  |
| 22            | 6             | 0           | 4.353875                | -3.103470 | 2.297924  |
| 23            | 1             | 0           | 3.872727                | -3.476973 | 0.238689  |
| 24            | 6             | 0           | 3.180816                | -1.276815 | 3.353291  |
| 25            | 1             | 0           | 1.776849                | -0.215642 | 2.099519  |
| 26            | 6             | 0           | 4.104455                | -2.317070 | 3.424389  |
| 27            | 1             | 0           | 5.065040                | -3.923856 | 2.352311  |
| 28            | 1             | 0           | 2.976248                | -0.665878 | 4.228673  |
| 29            | 1             | 0           | 4.624785                | -2.522226 | 4.356475  |
| 30            | 6             | 0           | 0.415836                | 3.080693  | -1.534197 |
| 31            | 6             | 0           | -0.612999               | 2.715348  | -2.408196 |
| 32            | 6             | 0           | 0.770774                | 4.430033  | -1.417514 |
| 33            | 6             | 0           | -1.266520               | 3.684767  | -3.167695 |
| 34            | 1             | 0           | -0.909285               | 1.671152  | -2.475571 |

|    |   |   |           |           |           |
|----|---|---|-----------|-----------|-----------|
| 35 | 6 | 0 | 0.115562  | 5.397236  | -2.175759 |
| 36 | 1 | 0 | 1.552492  | 4.730958  | -0.723461 |
| 37 | 6 | 0 | -0.902616 | 5.025272  | -3.054401 |
| 38 | 1 | 0 | -2.068090 | 3.391732  | -3.840736 |
| 39 | 1 | 0 | 0.395897  | 6.442837  | -2.076576 |
| 40 | 1 | 0 | -1.416386 | 5.781348  | -3.642634 |
| 41 | 6 | 0 | 1.730830  | 2.587538  | 0.967247  |
| 42 | 6 | 0 | 0.678038  | 2.776415  | 1.875849  |
| 43 | 6 | 0 | 3.016229  | 3.003724  | 1.326740  |
| 44 | 6 | 0 | 0.907337  | 3.381215  | 3.107338  |
| 45 | 1 | 0 | -0.324028 | 2.442668  | 1.613708  |
| 46 | 6 | 0 | 3.247140  | 3.599076  | 2.568114  |
| 47 | 1 | 0 | 3.854610  | 2.868601  | 0.649256  |
| 48 | 6 | 0 | 2.194713  | 3.792041  | 3.458973  |
| 49 | 1 | 0 | 0.080516  | 3.525948  | 3.797795  |
| 50 | 1 | 0 | 4.253111  | 3.912724  | 2.835036  |
| 51 | 1 | 0 | 2.375193  | 4.257591  | 4.424341  |
| 52 | 6 | 0 | 3.827599  | 0.549034  | -1.199714 |
| 53 | 1 | 0 | 4.778197  | 0.709847  | -1.721570 |
| 54 | 1 | 0 | 4.066031  | 0.558155  | -0.129456 |
| 55 | 1 | 0 | 3.405079  | 2.666679  | -1.476851 |
| 56 | 1 | 0 | 2.590080  | 1.614506  | -2.615178 |
| 57 | 6 | 0 | -2.365455 | -0.421922 | 0.123759  |
| 58 | 8 | 0 | -1.598523 | -1.435198 | 0.060388  |
| 59 | 8 | 0 | -1.891505 | 0.751057  | -0.040571 |
| 60 | 6 | 0 | -3.812940 | -0.600693 | 0.386986  |
| 61 | 6 | 0 | -4.656682 | 0.506116  | 0.476340  |
| 62 | 6 | 0 | -4.354969 | -1.882760 | 0.549318  |
| 63 | 6 | 0 | -6.018600 | 0.353852  | 0.725544  |
| 64 | 1 | 0 | -4.233597 | 1.498112  | 0.347329  |
| 65 | 6 | 0 | -5.706776 | -2.050025 | 0.796282  |
| 66 | 1 | 0 | -3.697048 | -2.743702 | 0.476876  |
| 67 | 6 | 0 | -6.548370 | -0.931346 | 0.886977  |
| 68 | 1 | 0 | -6.649486 | 1.233857  | 0.790321  |
| 69 | 1 | 0 | -6.140403 | -3.037963 | 0.923848  |
| 70 | 8 | 0 | -7.857122 | -1.196249 | 1.132854  |
| 71 | 6 | 0 | -8.747417 | -0.099182 | 1.239902  |
| 72 | 1 | 0 | -9.729195 | -0.529353 | 1.437023  |
| 73 | 1 | 0 | -8.469853 | 0.561366  | 2.069013  |
| 74 | 1 | 0 | -8.786539 | 0.476813  | 0.308525  |

```

-----
SCF Done: E(RPBE1PBE) = -6947.27219627 A.U. after 1 cycles
          Convrg = 0.1924D-08 -V/T = 2.0050
Zero-point correction= 0.595948 (Hartree/Particle)
Thermal correction to Energy= 0.643049
Thermal correction to Enthalpy= 0.644104
Thermal correction to Gibbs Free Energy= 0.505453
Sum of electronic and zero-point Energies= -6946.676248
Sum of electronic and thermal Energies= -6946.629148
Sum of electronic and thermal Enthalpies= -6946.628093
Sum of electronic and thermal Free Energies= -6946.766743

          1          2          3
          A          A          A
Frequencies -- 11.4081 16.5989 19.2256

```

DPPP-Rh-(*p*-*t*-BuPh) (20)

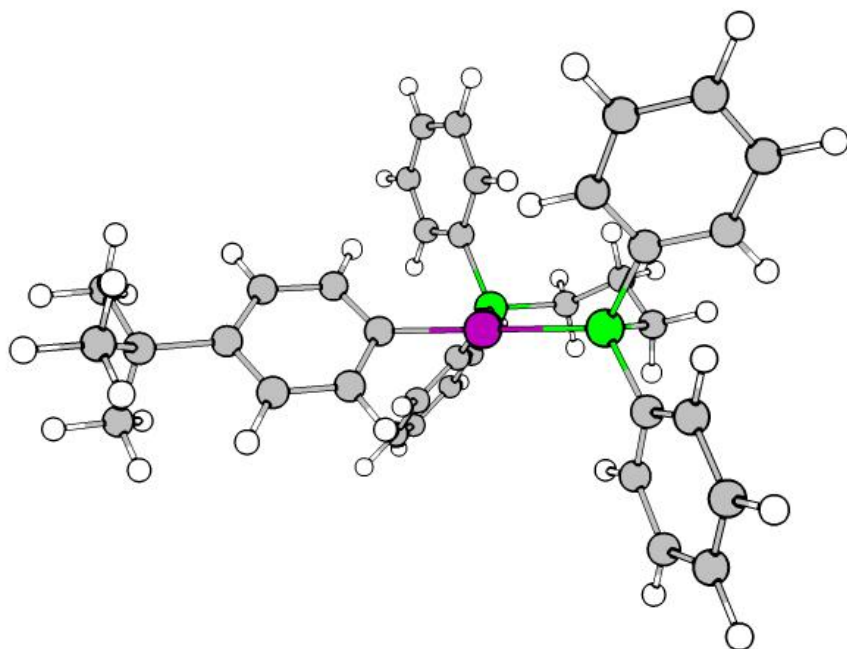

| Center Number | Atomic Number | Atomic Type | Coordinates (Angstroms) |           |           |
|---------------|---------------|-------------|-------------------------|-----------|-----------|
|               |               |             | X                       | Y         | Z         |
| 1             | 45            | 0           | 0.303830                | -0.346580 | -0.131739 |
| 2             | 15            | 0           | -0.124965               | 1.804289  | -0.386905 |
| 3             | 15            | 0           | 2.644131                | -0.197033 | -0.212658 |
| 4             | 6             | 0           | 3.367684                | 1.421887  | -0.728137 |
| 5             | 6             | 0           | 1.309190                | 2.951108  | -0.717117 |
| 6             | 1             | 0           | 3.284926                | 1.490910  | -1.818508 |
| 7             | 1             | 0           | 4.435955                | 1.440861  | -0.490298 |
| 8             | 6             | 0           | 3.451059                | -1.373878 | -1.373767 |
| 9             | 6             | 0           | 3.151173                | -1.243859 | -2.738455 |
| 10            | 6             | 0           | 4.261224                | -2.438428 | -0.964090 |
| 11            | 6             | 0           | 3.679260                | -2.131488 | -3.671325 |
| 12            | 1             | 0           | 2.484296                | -0.451644 | -3.073801 |
| 13            | 6             | 0           | 4.780866                | -3.334893 | -1.898764 |
| 14            | 1             | 0           | 4.489529                | -2.576918 | 0.089143  |
| 15            | 6             | 0           | 4.499123                | -3.180947 | -3.254011 |
| 16            | 1             | 0           | 3.440330                | -2.010799 | -4.724859 |
| 17            | 1             | 0           | 5.408266                | -4.156423 | -1.562231 |
| 18            | 1             | 0           | 4.906564                | -3.878727 | -3.980806 |
| 19            | 6             | 0           | 3.492555                | -0.499427 | 1.391888  |
| 20            | 6             | 0           | 4.874961                | -0.350439 | 1.570014  |
| 21            | 6             | 0           | 2.711617                | -0.886169 | 2.486706  |
| 22            | 6             | 0           | 5.459620                | -0.583500 | 2.812049  |
| 23            | 1             | 0           | 5.508170                | -0.064017 | 0.733502  |
| 24            | 6             | 0           | 3.295133                | -1.121867 | 3.731795  |
| 25            | 1             | 0           | 1.635450                | -0.993541 | 2.358819  |
| 26            | 6             | 0           | 4.669942                | -0.969513 | 3.896428  |
| 27            | 1             | 0           | 6.533369                | -0.465931 | 2.934140  |
| 28            | 1             | 0           | 2.673601                | -1.421936 | 4.571420  |
| 29            | 1             | 0           | 5.127304                | -1.150267 | 4.865726  |
| 30            | 6             | 0           | -1.244362               | 2.328161  | -1.757246 |
| 31            | 6             | 0           | -2.015744               | 1.370575  | -2.422269 |
| 32            | 6             | 0           | -1.322774               | 3.664464  | -2.180432 |
| 33            | 6             | 0           | -2.852954               | 1.736236  | -3.476128 |

|    |   |   |           |           |           |
|----|---|---|-----------|-----------|-----------|
| 34 | 1 | 0 | -1.954395 | 0.333890  | -2.103269 |
| 35 | 6 | 0 | -2.154383 | 4.029603  | -3.236432 |
| 36 | 1 | 0 | -0.739207 | 4.436485  | -1.685867 |
| 37 | 6 | 0 | -2.924047 | 3.065138  | -3.887155 |
| 38 | 1 | 0 | -3.447187 | 0.976668  | -3.977588 |
| 39 | 1 | 0 | -2.202091 | 5.069691  | -3.549284 |
| 40 | 1 | 0 | -3.573388 | 3.350078  | -4.711062 |
| 41 | 6 | 0 | -0.857452 | 2.601047  | 1.109542  |
| 42 | 6 | 0 | -1.983745 | 3.430628  | 1.082168  |
| 43 | 6 | 0 | -0.244509 | 2.342430  | 2.344048  |
| 44 | 6 | 0 | -2.471939 | 4.003793  | 2.257283  |
| 45 | 1 | 0 | -2.500054 | 3.620612  | 0.145696  |
| 46 | 6 | 0 | -0.719961 | 2.929456  | 3.513385  |
| 47 | 1 | 0 | 0.594989  | 1.651863  | 2.390235  |
| 48 | 6 | 0 | -1.837266 | 3.764305  | 3.473731  |
| 49 | 1 | 0 | -3.355869 | 4.635579  | 2.218371  |
| 50 | 1 | 0 | -0.228318 | 2.719533  | 4.459995  |
| 51 | 1 | 0 | -2.218690 | 4.212084  | 4.387746  |
| 52 | 6 | 0 | -1.644115 | -0.856719 | 0.060705  |
| 53 | 6 | 0 | -1.840309 | -2.103119 | -0.567946 |
| 54 | 6 | 0 | -2.684115 | -0.412506 | 0.886781  |
| 55 | 6 | 0 | -2.987701 | -2.866862 | -0.358997 |
| 56 | 1 | 0 | -1.080326 | -2.498907 | -1.248525 |
| 57 | 6 | 0 | -3.837440 | -1.176607 | 1.094181  |
| 58 | 1 | 0 | -2.602766 | 0.544334  | 1.399464  |
| 59 | 6 | 0 | -4.019950 | -2.420139 | 0.479779  |
| 60 | 1 | 0 | -3.077666 | -3.824031 | -0.870575 |
| 61 | 1 | 0 | -4.601531 | -0.779866 | 1.757728  |
| 62 | 6 | 0 | 2.649578  | 2.602305  | -0.071006 |
| 63 | 1 | 0 | 3.295123  | 3.484228  | -0.159740 |
| 64 | 1 | 0 | 2.532783  | 2.429395  | 1.005636  |
| 65 | 1 | 0 | 1.007606  | 3.952730  | -0.392533 |
| 66 | 1 | 0 | 1.433781  | 2.989718  | -1.805758 |
| 67 | 6 | 0 | -5.270717 | -3.279068 | 0.683160  |
| 68 | 6 | 0 | -5.967408 | -3.506275 | -0.669046 |
| 69 | 1 | 0 | -6.270894 | -2.553830 | -1.116197 |
| 70 | 1 | 0 | -5.313338 | -4.016752 | -1.382510 |
| 71 | 1 | 0 | -6.864275 | -4.123430 | -0.538433 |
| 72 | 6 | 0 | -6.278323 | -2.622073 | 1.631043  |
| 73 | 1 | 0 | -7.152326 | -3.272196 | 1.747342  |
| 74 | 1 | 0 | -5.854523 | -2.458556 | 2.627543  |
| 75 | 1 | 0 | -6.632585 | -1.659637 | 1.246915  |
| 76 | 6 | 0 | -4.871099 | -4.638992 | 1.279688  |
| 77 | 1 | 0 | -4.181231 | -5.181858 | 0.626453  |
| 78 | 1 | 0 | -4.380104 | -4.510062 | 2.249931  |
| 79 | 1 | 0 | -5.757163 | -5.268241 | 1.425426  |

```

-----
SCF Done: E(RPBE1PBE) = -6801.44970826 A.U. after 1 cycles
          Convg = 0.3822D-08 -V/T = 2.0050
Zero-point correction= 0.660012 (Hartree/Particle)
Thermal correction to Energy= 0.707846
Thermal correction to Enthalpy= 0.708901
Thermal correction to Gibbs Free Energy= 0.570379
Sum of electronic and zero-point Energies= -6800.789696
Sum of electronic and thermal Energies= -6800.741863
Sum of electronic and thermal Enthalpies= -6800.740808
Sum of electronic and thermal Free Energies= -6800.879329
          1          2          3
          A          A          A
Frequencies -- 12.6668 18.4123 20.4313

```

DPPP-Rh-(*p-t*-BuPh)-CO<sub>2</sub> (21)

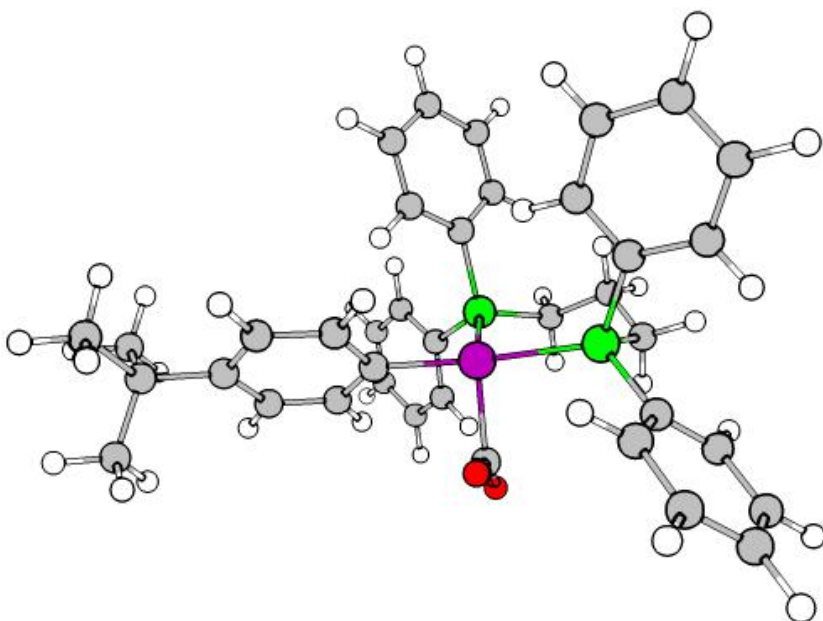

| Center Number | Atomic Number | Atomic Type | Coordinates (Angstroms) |           |           |
|---------------|---------------|-------------|-------------------------|-----------|-----------|
|               |               |             | X                       | Y         | Z         |
| 1             | 45            | 0           | -0.301916               | -0.581412 | 0.160311  |
| 2             | 15            | 0           | 0.204377                | 1.476956  | 0.946490  |
| 3             | 15            | 0           | -2.687373               | -0.215785 | 0.225342  |
| 4             | 6             | 0           | -3.298859               | 1.002737  | 1.463559  |
| 5             | 6             | 0           | -1.104102               | 2.223368  | 2.014078  |
| 6             | 1             | 0           | -3.209439               | 0.542474  | 2.454523  |
| 7             | 1             | 0           | -4.360996               | 1.198643  | 1.278082  |
| 8             | 6             | 0           | -3.736838               | -1.688813 | 0.494142  |
| 9             | 6             | 0           | -4.736647               | -1.762406 | 1.469988  |
| 10            | 6             | 0           | -3.504069               | -2.802286 | -0.324098 |
| 11            | 6             | 0           | -5.496284               | -2.923205 | 1.616261  |
| 12            | 1             | 0           | -4.936460               | -0.920339 | 2.125998  |
| 13            | 6             | 0           | -4.268664               | -3.955358 | -0.183855 |
| 14            | 1             | 0           | -2.713747               | -2.770475 | -1.069512 |
| 15            | 6             | 0           | -5.267369               | -4.019396 | 0.788206  |
| 16            | 1             | 0           | -6.267872               | -2.967573 | 2.380471  |
| 17            | 1             | 0           | -4.074583               | -4.810814 | -0.825177 |
| 18            | 1             | 0           | -5.858956               | -4.923598 | 0.904319  |
| 19            | 6             | 0           | -3.353704               | 0.475605  | -1.342056 |
| 20            | 6             | 0           | -4.709213               | 0.364547  | -1.678272 |
| 21            | 6             | 0           | -2.493377               | 1.158658  | -2.208638 |
| 22            | 6             | 0           | -5.193021               | 0.932653  | -2.853450 |
| 23            | 1             | 0           | -5.388211               | -0.180492 | -1.026656 |
| 24            | 6             | 0           | -2.979146               | 1.731651  | -3.383746 |
| 25            | 1             | 0           | -1.436569               | 1.247881  | -1.966471 |
| 26            | 6             | 0           | -4.329122               | 1.619298  | -3.708029 |
| 27            | 1             | 0           | -6.245787               | 0.835298  | -3.105789 |
| 28            | 1             | 0           | -2.298608               | 2.260721  | -4.045666 |
| 29            | 1             | 0           | -4.708040               | 2.059505  | -4.626656 |
| 30            | 6             | 0           | 1.630958                | 1.661891  | 2.082473  |
| 31            | 6             | 0           | 1.649830                | 0.878847  | 3.244784  |
| 32            | 6             | 0           | 2.666497                | 2.571394  | 1.850643  |
| 33            | 6             | 0           | 2.683750                | 1.019852  | 4.166623  |
| 34            | 1             | 0           | 0.875801                | 0.133218  | 3.414475  |

|    |   |   |           |           |           |
|----|---|---|-----------|-----------|-----------|
| 35 | 6 | 0 | 3.704766  | 2.701906  | 2.772753  |
| 36 | 1 | 0 | 2.671864  | 3.177608  | 0.949173  |
| 37 | 6 | 0 | 3.713483  | 1.931794  | 3.933539  |
| 38 | 1 | 0 | 2.690537  | 0.404255  | 5.062347  |
| 39 | 1 | 0 | 4.508246  | 3.408083  | 2.579825  |
| 40 | 1 | 0 | 4.523368  | 2.035715  | 4.650957  |
| 41 | 6 | 0 | 0.509815  | 2.728127  | -0.361436 |
| 42 | 6 | 0 | 1.265594  | 2.343424  | -1.477957 |
| 43 | 6 | 0 | 0.024615  | 4.040179  | -0.294850 |
| 44 | 6 | 0 | 1.534055  | 3.251908  | -2.499246 |
| 45 | 1 | 0 | 1.654773  | 1.329750  | -1.540928 |
| 46 | 6 | 0 | 0.283251  | 4.944067  | -1.323987 |
| 47 | 1 | 0 | -0.556191 | 4.376363  | 0.558755  |
| 48 | 6 | 0 | 1.038711  | 4.553329  | -2.428015 |
| 49 | 1 | 0 | 2.129725  | 2.938909  | -3.352742 |
| 50 | 1 | 0 | -0.105252 | 5.957019  | -1.259067 |
| 51 | 1 | 0 | 1.241350  | 5.260509  | -3.227990 |
| 52 | 6 | 0 | 1.667216  | -0.983725 | -0.227513 |
| 53 | 6 | 0 | 2.770411  | -1.143629 | 0.618270  |
| 54 | 6 | 0 | 1.867770  | -1.279703 | -1.583040 |
| 55 | 6 | 0 | 4.003758  | -1.572737 | 0.129719  |
| 56 | 1 | 0 | 2.678802  | -0.942784 | 1.682648  |
| 57 | 6 | 0 | 3.106799  | -1.702708 | -2.074619 |
| 58 | 1 | 0 | 1.042781  | -1.193045 | -2.294828 |
| 59 | 6 | 0 | 4.208278  | -1.858283 | -1.227400 |
| 60 | 1 | 0 | 3.194501  | -1.918175 | -3.136101 |
| 61 | 6 | 0 | -2.517358 | 2.316927  | 1.435643  |
| 62 | 1 | 0 | -3.072827 | 3.042828  | 2.040635  |
| 63 | 1 | 0 | -2.501168 | 2.727979  | 0.419414  |
| 64 | 1 | 0 | -0.747906 | 3.210549  | 2.328277  |
| 65 | 1 | 0 | -1.114391 | 1.612225  | 2.924112  |
| 66 | 6 | 0 | -0.341691 | -1.987501 | 1.626468  |
| 67 | 8 | 0 | -0.522575 | -2.811128 | 0.724016  |
| 68 | 8 | 0 | -0.235667 | -1.858530 | 2.823258  |
| 69 | 1 | 0 | 4.824146  | -1.685926 | 0.836280  |
| 70 | 6 | 0 | 5.580913  | -2.323884 | -1.718286 |
| 71 | 6 | 0 | 5.973371  | -3.622552 | -0.994263 |
| 72 | 1 | 0 | 6.027892  | -3.483229 | 0.089484  |
| 73 | 1 | 0 | 5.244201  | -4.415175 | -1.191846 |
| 74 | 1 | 0 | 6.955921  | -3.969017 | -1.335981 |
| 75 | 6 | 0 | 6.629793  | -1.239881 | -1.417650 |
| 76 | 1 | 0 | 6.377162  | -0.301075 | -1.922091 |
| 77 | 1 | 0 | 6.703286  | -1.032705 | -0.345786 |
| 78 | 1 | 0 | 7.619802  | -1.558153 | -1.765177 |
| 79 | 6 | 0 | 5.596864  | -2.597415 | -3.225263 |
| 80 | 1 | 0 | 6.595869  | -2.928934 | -3.528614 |
| 81 | 1 | 0 | 4.890246  | -3.386247 | -3.504271 |
| 82 | 1 | 0 | 5.357636  | -1.700609 | -3.806978 |

```

-----
SCF Done: E(RPBE1PBE) = -6989.88322624 A.U. after 1 cycles
          Conv = 0.6744D-08 -V/T = 2.0052
Zero-point correction= 0.673733 (Hartree/Particle)
Thermal correction to Energy= 0.725265
Thermal correction to Enthalpy= 0.726320
Thermal correction to Gibbs Free Energy= 0.581038
Sum of electronic and zero-point Energies= -6989.209493
Sum of electronic and thermal Energies= -6989.157961
Sum of electronic and thermal Enthalpies= -6989.156906
Sum of electronic and thermal Free Energies= -6989.302189

          1          2          3
          A          A          A
Frequencies -- 16.8218 21.5709 22.8010

```

DPPP-Rh-(*p*-*t*-BuPh)-CO<sub>2</sub>-TS2 (22)

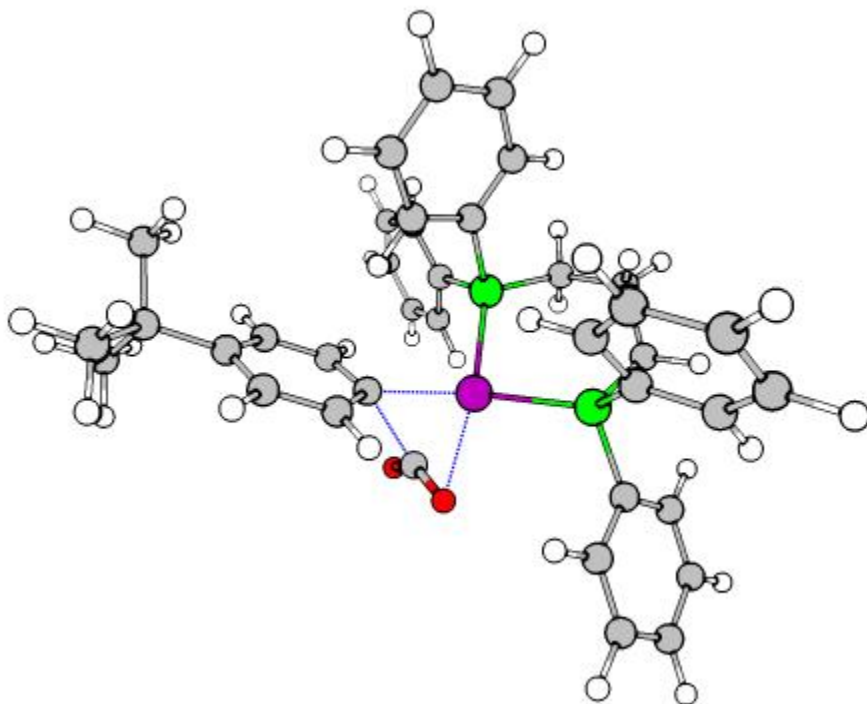

| Center Number | Atomic Number | Atomic Type | Coordinates (Angstroms) |           |           |
|---------------|---------------|-------------|-------------------------|-----------|-----------|
|               |               |             | X                       | Y         | Z         |
| 1             | 45            | 0           | -0.515016               | -0.619478 | 0.393410  |
| 2             | 15            | 0           | 0.204446                | 1.433166  | 1.000250  |
| 3             | 15            | 0           | -2.715407               | 0.112223  | 0.145585  |
| 4             | 6             | 0           | -3.307136               | 1.545295  | 1.137483  |
| 5             | 6             | 0           | -1.044498               | 2.538905  | 1.794644  |
| 6             | 1             | 0           | -3.387468               | 1.224031  | 2.182259  |
| 7             | 1             | 0           | -4.308745               | 1.827650  | 0.794481  |
| 8             | 6             | 0           | -3.973296               | -1.184242 | 0.432553  |
| 9             | 6             | 0           | -5.021048               | -1.051036 | 1.349747  |
| 10            | 6             | 0           | -3.857433               | -2.373835 | -0.299131 |
| 11            | 6             | 0           | -5.941538               | -2.084267 | 1.525142  |
| 12            | 1             | 0           | -5.135860               | -0.144054 | 1.935521  |
| 13            | 6             | 0           | -4.781034               | -3.399637 | -0.128432 |
| 14            | 1             | 0           | -3.036393               | -2.500684 | -0.999306 |
| 15            | 6             | 0           | -5.825632               | -3.258650 | 0.785550  |
| 16            | 1             | 0           | -6.750906               | -1.967084 | 2.241131  |
| 17            | 1             | 0           | -4.677481               | -4.316630 | -0.702256 |
| 18            | 1             | 0           | -6.542775               | -4.063470 | 0.923627  |
| 19            | 6             | 0           | -3.091432               | 0.667191  | -1.565778 |
| 20            | 6             | 0           | -4.410657               | 0.791385  | -2.020886 |
| 21            | 6             | 0           | -2.039429               | 0.998014  | -2.426132 |
| 22            | 6             | 0           | -4.670542               | 1.246725  | -3.310199 |
| 23            | 1             | 0           | -5.239337               | 0.515825  | -1.372051 |
| 24            | 6             | 0           | -2.300754               | 1.458164  | -3.716822 |
| 25            | 1             | 0           | -1.011878               | 0.890008  | -2.084498 |
| 26            | 6             | 0           | -3.615272               | 1.583227  | -4.160116 |
| 27            | 1             | 0           | -5.697528               | 1.333577  | -3.655575 |
| 28            | 1             | 0           | -1.474378               | 1.712838  | -4.375198 |
| 29            | 1             | 0           | -3.819938               | 1.935582  | -5.167764 |
| 30            | 6             | 0           | 1.464457                | 1.474754  | 2.334866  |



|    |   |   |           |           |           |
|----|---|---|-----------|-----------|-----------|
| 31 | 6 | 0 | 1.257527  | 0.644105  | 3.443894  |
| 32 | 6 | 0 | 2.576180  | 2.321415  | 2.312008  |
| 33 | 6 | 0 | 2.141774  | 0.671124  | 4.518664  |
| 34 | 1 | 0 | 0.420122  | -0.051321 | 3.449802  |
| 35 | 6 | 0 | 3.466080  | 2.339620  | 3.386213  |
| 36 | 1 | 0 | 2.759649  | 2.960498  | 1.452225  |
| 37 | 6 | 0 | 3.249191  | 1.519609  | 4.491924  |
| 38 | 1 | 0 | 1.975007  | 0.014955  | 5.368714  |
| 39 | 1 | 0 | 4.332373  | 2.995564  | 3.355108  |
| 40 | 1 | 0 | 3.945790  | 1.533490  | 5.326090  |
| 41 | 6 | 0 | 0.933928  | 2.454122  | -0.342150 |
| 42 | 6 | 0 | 1.793594  | 1.820305  | -1.251063 |
| 43 | 6 | 0 | 0.671805  | 3.819892  | -0.504737 |
| 44 | 6 | 0 | 2.387821  | 2.540283  | -2.284249 |
| 45 | 1 | 0 | 1.997042  | 0.757135  | -1.149511 |
| 46 | 6 | 0 | 1.255943  | 4.536240  | -1.549018 |
| 47 | 1 | 0 | 0.009539  | 4.344546  | 0.177288  |
| 48 | 6 | 0 | 2.118415  | 3.899991  | -2.439058 |
| 49 | 1 | 0 | 3.058211  | 2.033361  | -2.973555 |
| 50 | 1 | 0 | 1.035838  | 5.594468  | -1.663537 |
| 51 | 1 | 0 | 2.575443  | 4.459952  | -3.250749 |
| 52 | 6 | 0 | 1.417292  | -1.488863 | 0.144267  |
| 53 | 6 | 0 | 2.626370  | -1.251520 | 0.813709  |
| 54 | 6 | 0 | 1.502434  | -1.985614 | -1.164234 |
| 55 | 6 | 0 | 3.849120  | -1.430930 | 0.179211  |
| 56 | 1 | 0 | 2.613899  | -0.938964 | 1.853595  |
| 57 | 6 | 0 | 2.731979  | -2.159630 | -1.804518 |
| 58 | 1 | 0 | 0.592592  | -2.252043 | -1.699581 |
| 59 | 6 | 0 | 3.935241  | -1.876633 | -1.150991 |
| 60 | 1 | 0 | 4.757585  | -1.223035 | 0.740912  |
| 61 | 1 | 0 | 2.734337  | -2.535460 | -2.823598 |
| 62 | 6 | 0 | -2.362025 | 2.743842  | 1.046279  |
| 63 | 1 | 0 | -2.871403 | 3.606219  | 1.491576  |
| 64 | 1 | 0 | -2.183543 | 3.008518  | -0.002876 |
| 65 | 1 | 0 | -0.561908 | 3.498803  | 2.008892  |
| 66 | 1 | 0 | -1.242043 | 2.084324  | 2.772630  |
| 67 | 6 | 0 | 0.058613  | -2.517352 | 1.268768  |
| 68 | 8 | 0 | -0.853581 | -2.793035 | 0.464479  |
| 69 | 8 | 0 | 0.548393  | -2.887563 | 2.303202  |
| 70 | 6 | 0 | 5.302358  | -2.054913 | -1.811662 |
| 71 | 6 | 0 | 6.128702  | -3.077634 | -1.013374 |
| 72 | 1 | 0 | 5.624118  | -4.048715 | -0.982074 |
| 73 | 1 | 0 | 7.110886  | -3.217684 | -1.479205 |
| 74 | 1 | 0 | 6.292578  | -2.753118 | 0.018281  |
| 75 | 6 | 0 | 6.040854  | -0.705618 | -1.825996 |
| 76 | 1 | 0 | 5.477920  | 0.042550  | -2.394680 |
| 77 | 1 | 0 | 6.192105  | -0.312762 | -0.816317 |
| 78 | 1 | 0 | 7.026444  | -0.816561 | -2.292580 |
| 79 | 6 | 0 | 5.191737  | -2.554259 | -3.255227 |
| 80 | 1 | 0 | 6.193758  | -2.659759 | -3.684456 |
| 81 | 1 | 0 | 4.705229  | -3.533471 | -3.312939 |
| 82 | 1 | 0 | 4.634631  | -1.856070 | -3.889130 |

```

-----
SCF Done: E(RPBE1PBE) = -6989.86689370 A.U. after 1 cycles
          Convg = 0.6603D-08 -V/T = 2.0052
Zero-point correction= 0.672576 (Hartree/Particle)
Thermal correction to Energy= 0.723570
Thermal correction to Enthalpy= 0.724625
Thermal correction to Gibbs Free Energy= 0.580121
Sum of electronic and zero-point Energies= -6989.194317
Sum of electronic and thermal Energies= -6989.143323
Sum of electronic and thermal Enthalpies= -6989.142268
Sum of electronic and thermal Free Energies= -6989.286773

```



|    |   |   |           |           |           |
|----|---|---|-----------|-----------|-----------|
| 32 | 6 | 0 | -1.734057 | -4.391877 | -1.296149 |
| 33 | 6 | 0 | 0.173546  | -3.901460 | -3.268226 |
| 34 | 1 | 0 | 0.075808  | -1.842244 | -2.631131 |
| 35 | 6 | 0 | -1.250622 | -5.441202 | -2.073947 |
| 36 | 1 | 0 | -2.464590 | -4.594408 | -0.516124 |
| 37 | 6 | 0 | -0.298067 | -5.196918 | -3.063657 |
| 38 | 1 | 0 | 0.925800  | -3.708096 | -4.028525 |
| 39 | 1 | 0 | -1.613347 | -6.451628 | -1.903097 |
| 40 | 1 | 0 | 0.081842  | -6.017244 | -3.667220 |
| 41 | 6 | 0 | -2.320520 | -2.404711 | 1.079584  |
| 42 | 6 | 0 | -1.227631 | -2.637482 | 1.928715  |
| 43 | 6 | 0 | -3.605960 | -2.721361 | 1.529242  |
| 44 | 6 | 0 | -1.419249 | -3.188927 | 3.191410  |
| 45 | 1 | 0 | -0.224865 | -2.377528 | 1.594367  |
| 46 | 6 | 0 | -3.797813 | -3.262446 | 2.801740  |
| 47 | 1 | 0 | -4.473989 | -2.548206 | 0.899125  |
| 48 | 6 | 0 | -2.706602 | -3.500756 | 3.633126  |
| 49 | 1 | 0 | -0.562550 | -3.368954 | 3.835604  |
| 50 | 1 | 0 | -4.803687 | -3.497797 | 3.139991  |
| 51 | 1 | 0 | -2.857065 | -3.923919 | 4.622857  |
| 52 | 6 | 0 | -4.350889 | -0.194639 | -0.931712 |
| 53 | 1 | 0 | -5.361621 | -0.258915 | -1.351251 |
| 54 | 1 | 0 | -4.476569 | -0.178414 | 0.157635  |
| 55 | 1 | 0 | -4.179002 | -2.343981 | -1.235901 |
| 56 | 1 | 0 | -3.358151 | -1.379873 | -2.445623 |
| 57 | 6 | 0 | 1.988486  | 0.107558  | -0.065633 |
| 58 | 8 | 0 | 1.340501  | 1.200371  | -0.125492 |
| 59 | 8 | 0 | 1.379606  | -1.007047 | -0.172845 |
| 60 | 6 | 0 | 3.461253  | 0.127005  | 0.129178  |
| 61 | 6 | 0 | 4.181165  | -1.064224 | 0.210729  |
| 62 | 6 | 0 | 4.148245  | 1.340060  | 0.233711  |
| 63 | 6 | 0 | 5.561760  | -1.044025 | 0.397760  |
| 64 | 1 | 0 | 3.648077  | -2.006911 | 0.125341  |
| 65 | 6 | 0 | 5.524298  | 1.351509  | 0.418232  |
| 66 | 1 | 0 | 3.588776  | 2.268738  | 0.166976  |
| 67 | 6 | 0 | 6.265074  | 0.161410  | 0.507014  |
| 68 | 1 | 0 | 6.087874  | -1.991328 | 0.457880  |
| 69 | 1 | 0 | 6.030243  | 2.310899  | 0.494791  |
| 70 | 6 | 0 | 7.779392  | 0.220830  | 0.713747  |
| 71 | 6 | 0 | 8.086384  | 0.964829  | 2.024665  |
| 72 | 1 | 0 | 9.169060  | 1.013517  | 2.186812  |
| 73 | 1 | 0 | 7.705928  | 1.990444  | 2.011183  |
| 74 | 1 | 0 | 7.636241  | 0.451836  | 2.880841  |
| 75 | 6 | 0 | 8.425273  | 0.973157  | -0.462252 |
| 76 | 1 | 0 | 9.511809  | 1.022753  | -0.328180 |
| 77 | 1 | 0 | 8.221865  | 0.465563  | -1.410865 |
| 78 | 1 | 0 | 8.053126  | 1.998516  | -0.544818 |
| 79 | 6 | 0 | 8.411632  | -1.171682 | 0.794996  |
| 80 | 1 | 0 | 8.015062  | -1.752997 | 1.633993  |
| 81 | 1 | 0 | 8.258807  | -1.745689 | -0.124943 |
| 82 | 1 | 0 | 9.492060  | -1.074998 | 0.944788  |

-----

SCF Done: E(RPBE1PBE) = -6989.92466710 A.U. after 1 cycles  
 Convrg = 0.3939D-08 -V/T = 2.0052

Zero-point correction= 0.675974 (Hartree/Particle)  
 Thermal correction to Energy= 0.726829  
 Thermal correction to Enthalpy= 0.727884  
 Thermal correction to Gibbs Free Energy= 0.581071  
 Sum of electronic and zero-point Energies= -6989.248693  
 Sum of electronic and thermal Energies= -6989.197838  
 Sum of electronic and thermal Enthalpies= -6989.196783  
 Sum of electronic and thermal Free Energies= -6989.343596

1

2

3

Frequencies --

A  
8.8184

A  
15.7884

A  
17.7893

### DPPP-Rh-(*p*-FPh) (24)

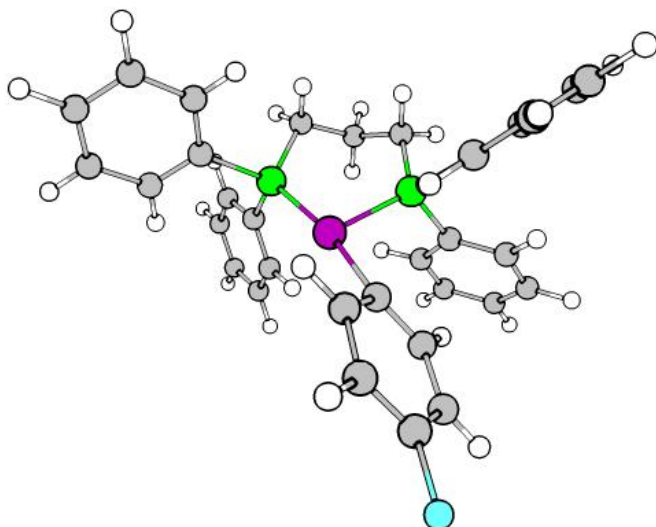

| Center Number | Atomic Number | Atomic Type | Coordinates (Angstroms) |           |           |
|---------------|---------------|-------------|-------------------------|-----------|-----------|
|               |               |             | X                       | Y         | Z         |
| 1             | 45            | 0           | 0.101853                | -0.571620 | 0.367563  |
| 2             | 15            | 0           | -1.114599               | 0.640863  | -1.017890 |
| 3             | 15            | 0           | 2.188179                | 0.017039  | -0.512064 |
| 4             | 6             | 0           | 2.212531                | 0.799740  | -2.182029 |
| 5             | 6             | 0           | -0.259046               | 1.455925  | -2.463799 |
| 6             | 1             | 0           | 1.991769                | 0.026395  | -2.925596 |
| 7             | 1             | 0           | 3.218096                | 1.175395  | -2.397862 |
| 8             | 6             | 0           | 3.370719                | -1.381071 | -0.676325 |
| 9             | 6             | 0           | 3.228179                | -2.296159 | -1.728989 |
| 10            | 6             | 0           | 4.340771                | -1.631982 | 0.302417  |
| 11            | 6             | 0           | 4.055198                | -3.413255 | -1.817118 |
| 12            | 1             | 0           | 2.461548                | -2.147163 | -2.485519 |
| 13            | 6             | 0           | 5.162565                | -2.754787 | 0.217895  |
| 14            | 1             | 0           | 4.460789                | -0.946635 | 1.137474  |
| 15            | 6             | 0           | 5.027196                | -3.646368 | -0.844234 |
| 16            | 1             | 0           | 3.934425                | -4.107120 | -2.645087 |
| 17            | 1             | 0           | 5.911032                | -2.930815 | 0.986304  |
| 18            | 1             | 0           | 5.669566                | -4.520352 | -0.911423 |
| 19            | 6             | 0           | 3.132437                | 1.244244  | 0.480971  |
| 20            | 6             | 0           | 4.391559                | 1.724573  | 0.095872  |
| 21            | 6             | 0           | 2.560119                | 1.721137  | 1.664918  |
| 22            | 6             | 0           | 5.059153                | 2.663849  | 0.876487  |
| 23            | 1             | 0           | 4.864966                | 1.353539  | -0.810486 |
| 24            | 6             | 0           | 3.229082                | 2.660835  | 2.450454  |
| 25            | 1             | 0           | 1.580781                | 1.349735  | 1.964605  |
| 26            | 6             | 0           | 4.477956                | 3.134831  | 2.055600  |
| 27            | 1             | 0           | 6.036072                | 3.027201  | 0.567884  |
| 28            | 1             | 0           | 2.773116                | 3.019842  | 3.369473  |
| 29            | 1             | 0           | 5.001075                | 3.867427  | 2.664696  |
| 30            | 6             | 0           | -2.495237               | -0.158398 | -1.941672 |
| 31            | 6             | 0           | -2.803681               | -1.500156 | -1.704919 |
| 32            | 6             | 0           | -3.213527               | 0.533402  | -2.929671 |
| 33            | 6             | 0           | -3.809312               | -2.139012 | -2.430729 |
| 34            | 1             | 0           | -2.252126               | -2.037918 | -0.939428 |

|    |   |   |           |           |           |
|----|---|---|-----------|-----------|-----------|
| 35 | 6 | 0 | -4.215829 | -0.103655 | -3.656157 |
| 36 | 1 | 0 | -3.002851 | 1.580375  | -3.132965 |
| 37 | 6 | 0 | -4.516432 | -1.443729 | -3.408306 |
| 38 | 1 | 0 | -4.038089 | -3.182174 | -2.228589 |
| 39 | 1 | 0 | -4.764405 | 0.448017  | -4.415489 |
| 40 | 1 | 0 | -5.299709 | -1.940289 | -3.975295 |
| 41 | 6 | 0 | -1.916823 | 2.086829  | -0.201188 |
| 42 | 6 | 0 | -3.301917 | 2.280277  | -0.153092 |
| 43 | 6 | 0 | -1.088268 | 3.012477  | 0.450232  |
| 44 | 6 | 0 | -3.842285 | 3.383808  | 0.509154  |
| 45 | 1 | 0 | -3.970299 | 1.562467  | -0.619610 |
| 46 | 6 | 0 | -1.626241 | 4.121738  | 1.095822  |
| 47 | 1 | 0 | -0.013277 | 2.850249  | 0.476214  |
| 48 | 6 | 0 | -3.008504 | 4.312474  | 1.126683  |
| 49 | 1 | 0 | -4.921306 | 3.511847  | 0.542943  |
| 50 | 1 | 0 | -0.965716 | 4.830346  | 1.589189  |
| 51 | 1 | 0 | -3.431120 | 5.172089  | 1.640204  |
| 52 | 6 | 0 | -1.517093 | -1.241791 | 1.396406  |
| 53 | 6 | 0 | -1.431451 | -2.628163 | 1.637085  |
| 54 | 6 | 0 | -2.473530 | -0.529304 | 2.139192  |
| 55 | 6 | 0 | -2.230593 | -3.275237 | 2.583465  |
| 56 | 1 | 0 | -0.722346 | -3.237162 | 1.072631  |
| 57 | 6 | 0 | -3.287441 | -1.152267 | 3.089376  |
| 58 | 1 | 0 | -2.590721 | 0.541957  | 1.988730  |
| 59 | 6 | 0 | -3.148775 | -2.516572 | 3.293034  |
| 60 | 1 | 0 | -2.154293 | -4.344219 | 2.765749  |
| 61 | 1 | 0 | -4.019035 | -0.593685 | 3.667912  |
| 62 | 6 | 0 | 1.184635  | 1.928640  | -2.289654 |
| 63 | 1 | 0 | 1.435064  | 2.527565  | -3.173504 |
| 64 | 1 | 0 | 1.276534  | 2.613446  | -1.438425 |
| 65 | 1 | 0 | -0.876040 | 2.308491  | -2.767561 |
| 66 | 1 | 0 | -0.300811 | 0.727855  | -3.282413 |
| 67 | 9 | 0 | -3.939611 | -3.129956 | 4.211237  |

```

-----
SCF Done: E(RPBE1PBE) = -6743.55479041 A.U. after 1 cycles
          Convg = 0.2036D-08 -V/T = 2.0048
Zero-point correction= 0.538565 (Hartree/Particle)
Thermal correction to Energy= 0.580631
Thermal correction to Enthalpy= 0.581686
Thermal correction to Gibbs Free Energy= 0.455002
Sum of electronic and zero-point Energies= -6743.016226
Sum of electronic and thermal Energies= -6742.974160
Sum of electronic and thermal Enthalpies= -6742.973105
Sum of electronic and thermal Free Energies= -6743.099789

          1          2          3
          A          A          A
Frequencies -- 12.5335 17.0443 23.1148

```

DPPP-Rh-(*p*-FPh)-CO<sub>2</sub> (25)

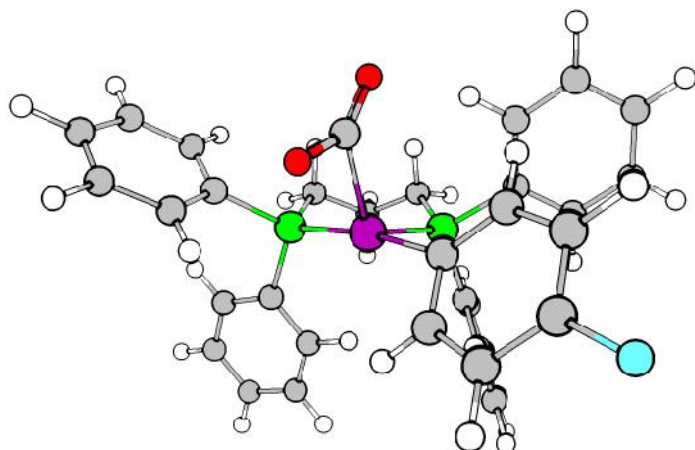

| Center Number | Atomic Number | Atomic Type | Coordinates (Angstroms) |           |           |
|---------------|---------------|-------------|-------------------------|-----------|-----------|
|               |               |             | X                       | Y         | Z         |
| 1             | 45            | 0           | 0.068340                | -0.711332 | 0.294580  |
| 2             | 15            | 0           | -1.086411               | 0.708950  | -1.034967 |
| 3             | 15            | 0           | 2.223703                | 0.039521  | -0.480577 |
| 4             | 6             | 0           | 2.294887                | 0.729061  | -2.186795 |
| 5             | 6             | 0           | -0.204710               | 1.172804  | -2.588019 |
| 6             | 1             | 0           | 2.186352                | -0.106167 | -2.888634 |
| 7             | 1             | 0           | 3.279715                | 1.180672  | -2.350799 |
| 8             | 6             | 0           | 3.573994                | -1.191059 | -0.432421 |
| 9             | 6             | 0           | 4.400644                | -1.480834 | -1.522908 |
| 10            | 6             | 0           | 3.768416                | -1.883468 | 0.770326  |
| 11            | 6             | 0           | 5.410886                | -2.435994 | -1.408470 |
| 12            | 1             | 0           | 4.270012                | -0.968575 | -2.471401 |
| 13            | 6             | 0           | 4.781781                | -2.828635 | 0.885777  |
| 14            | 1             | 0           | 3.117872                | -1.689004 | 1.619091  |
| 15            | 6             | 0           | 5.606295                | -3.108031 | -0.204514 |
| 16            | 1             | 0           | 6.044661                | -2.652832 | -2.264362 |
| 17            | 1             | 0           | 4.918954                | -3.358421 | 1.824516  |
| 18            | 1             | 0           | 6.392877                | -3.852806 | -0.117231 |
| 19            | 6             | 0           | 2.902219                | 1.424301  | 0.518977  |
| 20            | 6             | 0           | 4.274002                | 1.707474  | 0.550455  |
| 21            | 6             | 0           | 2.024315                | 2.238675  | 1.242696  |
| 22            | 6             | 0           | 4.753495                | 2.788750  | 1.284613  |
| 23            | 1             | 0           | 4.973129                | 1.072375  | 0.011464  |
| 24            | 6             | 0           | 2.504400                | 3.325071  | 1.973634  |
| 25            | 1             | 0           | 0.957212                | 2.027652  | 1.236253  |
| 26            | 6             | 0           | 3.869344                | 3.601588  | 1.995684  |
| 27            | 1             | 0           | 5.820410                | 2.995264  | 1.305779  |
| 28            | 1             | 0           | 1.809262                | 3.949965  | 2.528178  |
| 29            | 1             | 0           | 4.246162                | 4.443859  | 2.569954  |
| 30            | 6             | 0           | -2.665548               | 0.131539  | -1.763857 |
| 31            | 6             | 0           | -2.642000               | -1.031721 | -2.545851 |
| 32            | 6             | 0           | -3.870685               | 0.819021  | -1.595116 |
| 33            | 6             | 0           | -3.805795               | -1.486630 | -3.160023 |
| 34            | 1             | 0           | -1.723046               | -1.605114 | -2.647597 |
| 35            | 6             | 0           | -5.035460               | 0.354218  | -2.205459 |
| 36            | 1             | 0           | -3.910124               | 1.716533  | -0.984447 |
| 37            | 6             | 0           | -5.005636               | -0.794980 | -2.992092 |
| 38            | 1             | 0           | -3.775700               | -2.392482 | -3.759859 |
| 39            | 1             | 0           | -5.967858               | 0.894173  | -2.062462 |
| 40            | 1             | 0           | -5.914595               | -1.155256 | -3.466685 |

|    |   |   |           |           |           |
|----|---|---|-----------|-----------|-----------|
| 41 | 6 | 0 | -1.517642 | 2.307215  | -0.244592 |
| 42 | 6 | 0 | -1.953192 | 2.286671  | 1.087658  |
| 43 | 6 | 0 | -1.436549 | 3.536869  | -0.909918 |
| 44 | 6 | 0 | -2.306887 | 3.467669  | 1.736036  |
| 45 | 1 | 0 | -2.026747 | 1.338184  | 1.614255  |
| 46 | 6 | 0 | -1.777942 | 4.719204  | -0.255336 |
| 47 | 1 | 0 | -1.109961 | 3.589105  | -1.944170 |
| 48 | 6 | 0 | -2.215135 | 4.687859  | 1.067679  |
| 49 | 1 | 0 | -2.652178 | 3.432276  | 2.765909  |
| 50 | 1 | 0 | -1.704572 | 5.666062  | -0.783694 |
| 51 | 1 | 0 | -2.484179 | 5.610603  | 1.574820  |
| 52 | 6 | 0 | -1.640917 | -1.299297 | 1.266144  |
| 53 | 6 | 0 | -2.752524 | -2.015705 | 0.807800  |
| 54 | 6 | 0 | -1.564764 | -1.042075 | 2.645651  |
| 55 | 6 | 0 | -3.752009 | -2.457790 | 1.678703  |
| 56 | 1 | 0 | -2.853184 | -2.252074 | -0.247886 |
| 57 | 6 | 0 | -2.554294 | -1.464708 | 3.536442  |
| 58 | 1 | 0 | -0.709464 | -0.504999 | 3.059904  |
| 59 | 6 | 0 | -3.635876 | -2.167393 | 3.028128  |
| 60 | 1 | 0 | -2.488984 | -1.264348 | 4.602634  |
| 61 | 6 | 0 | 1.199972  | 1.764039  | -2.450764 |
| 62 | 1 | 0 | 1.440325  | 2.263923  | -3.396105 |
| 63 | 1 | 0 | 1.225654  | 2.548205  | -1.684957 |
| 64 | 1 | 0 | -0.858370 | 1.852508  | -3.145620 |
| 65 | 1 | 0 | -0.164317 | 0.252255  | -3.181566 |
| 66 | 6 | 0 | 0.260140  | -2.563802 | -0.522765 |
| 67 | 8 | 0 | 0.808890  | -2.885039 | 0.535734  |
| 68 | 8 | 0 | -0.076134 | -2.966441 | -1.610544 |
| 69 | 9 | 0 | -4.605543 | -2.586188 | 3.879527  |
| 70 | 1 | 0 | -4.609504 | -3.020576 | 1.319502  |

-----

SCF Done: E(RPBE1PBE) = -6931.98769121 A.U. after 1 cycles  
 Convg = 0.3233D-08 -V/T = 2.0050

Zero-point correction= 0.552050 (Hartree/Particle)  
 Thermal correction to Energy= 0.597934  
 Thermal correction to Enthalpy= 0.598989  
 Thermal correction to Gibbs Free Energy= 0.464574  
 Sum of electronic and zero-point Energies= -6931.435641  
 Sum of electronic and thermal Energies= -6931.389757  
 Sum of electronic and thermal Enthalpies= -6931.388702  
 Sum of electronic and thermal Free Energies= -6931.523117

|                | 1       | 2       | 3       |
|----------------|---------|---------|---------|
|                | A       | A       | A       |
| Frequencies -- | 14.0374 | 21.8634 | 24.6951 |

DPPP-Rh-(*p*-FPh)-CO<sub>2</sub>-TS2 (26)

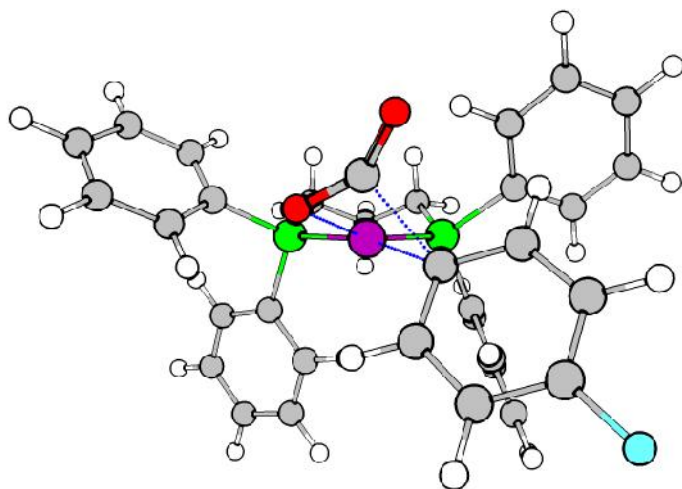

| Center Number | Atomic Number | Atomic Type | Coordinates (Angstroms) |           |           |
|---------------|---------------|-------------|-------------------------|-----------|-----------|
|               |               |             | X                       | Y         | Z         |
| 1             | 45            | 0           | 0.193367                | -0.769906 | 0.198721  |
| 2             | 15            | 0           | -1.019090               | 0.517905  | -1.207608 |
| 3             | 15            | 0           | 2.205793                | 0.110137  | -0.578938 |
| 4             | 6             | 0           | 2.311744                | 0.738293  | -2.305374 |
| 5             | 6             | 0           | -0.185574               | 1.033119  | -2.772908 |
| 6             | 1             | 0           | 2.266654                | -0.122041 | -2.983031 |
| 7             | 1             | 0           | 3.281889                | 1.227531  | -2.447656 |
| 8             | 6             | 0           | 3.629211                | -1.026638 | -0.422248 |
| 9             | 6             | 0           | 4.453217                | -1.384125 | -1.494719 |
| 10            | 6             | 0           | 3.885111                | -1.570371 | 0.843584  |
| 11            | 6             | 0           | 5.519289                | -2.262819 | -1.302175 |
| 12            | 1             | 0           | 4.278682                | -0.983063 | -2.488665 |
| 13            | 6             | 0           | 4.953180                | -2.440239 | 1.034711  |
| 14            | 1             | 0           | 3.241847                | -1.316674 | 1.681538  |
| 15            | 6             | 0           | 5.773371                | -2.789960 | -0.038321 |
| 16            | 1             | 0           | 6.151961                | -2.532524 | -2.143835 |
| 17            | 1             | 0           | 5.138642                | -2.854772 | 2.021925  |
| 18            | 1             | 0           | 6.604058                | -3.474823 | 0.109912  |
| 19            | 6             | 0           | 2.751887                | 1.576386  | 0.383499  |
| 20            | 6             | 0           | 4.070802                | 2.044265  | 0.316660  |
| 21            | 6             | 0           | 1.825875                | 2.257563  | 1.179680  |
| 22            | 6             | 0           | 4.451463                | 3.178879  | 1.027180  |
| 23            | 1             | 0           | 4.808850                | 1.511832  | -0.279532 |
| 24            | 6             | 0           | 2.207087                | 3.396642  | 1.888990  |
| 25            | 1             | 0           | 0.803824                | 1.890111  | 1.246068  |
| 26            | 6             | 0           | 3.518854                | 3.858712  | 1.813005  |
| 27            | 1             | 0           | 5.478507                | 3.530642  | 0.973295  |
| 28            | 1             | 0           | 1.477475                | 3.918029  | 2.503000  |
| 29            | 1             | 0           | 3.818684                | 4.743024  | 2.369298  |
| 30            | 6             | 0           | -2.488947               | -0.289259 | -1.953258 |
| 31            | 6             | 0           | -2.338590               | -1.597609 | -2.431491 |
| 32            | 6             | 0           | -3.718455               | 0.357541  | -2.105952 |
| 33            | 6             | 0           | -3.397829               | -2.242002 | -3.064714 |
| 34            | 1             | 0           | -1.399241               | -2.125519 | -2.276579 |
| 35            | 6             | 0           | -4.781128               | -0.293946 | -2.732337 |
| 36            | 1             | 0           | -3.856478               | 1.367325  | -1.728295 |
| 37            | 6             | 0           | -4.622662               | -1.591043 | -3.216282 |
| 38            | 1             | 0           | -3.270543               | -3.259944 | -3.423193 |
| 39            | 1             | 0           | -5.735564               | 0.215258  | -2.838814 |



|    |   |   |           |           |           |
|----|---|---|-----------|-----------|-----------|
| 40 | 1 | 0 | -5.453056 | -2.097564 | -3.701110 |
| 41 | 6 | 0 | -1.671496 | 2.081889  | -0.498705 |
| 42 | 6 | 0 | -2.214724 | 2.038300  | 0.793389  |
| 43 | 6 | 0 | -1.646339 | 3.306413  | -1.177207 |
| 44 | 6 | 0 | -2.733913 | 3.187620  | 1.383456  |
| 45 | 1 | 0 | -2.228881 | 1.098799  | 1.340175  |
| 46 | 6 | 0 | -2.152758 | 4.459944  | -0.579171 |
| 47 | 1 | 0 | -1.231650 | 3.379858  | -2.178015 |
| 48 | 6 | 0 | -2.700882 | 4.403257  | 0.700300  |
| 49 | 1 | 0 | -3.158988 | 3.132695  | 2.382192  |
| 50 | 1 | 0 | -2.118989 | 5.403317  | -1.117872 |
| 51 | 1 | 0 | -3.097652 | 5.302437  | 1.164193  |
| 52 | 6 | 0 | -1.444921 | -1.471951 | 1.384498  |
| 53 | 6 | 0 | -2.771569 | -1.754200 | 1.028254  |
| 54 | 6 | 0 | -1.189661 | -1.114303 | 2.720254  |
| 55 | 6 | 0 | -3.815725 | -1.619410 | 1.938714  |
| 56 | 1 | 0 | -2.995946 | -2.104922 | 0.025874  |
| 57 | 6 | 0 | -2.218564 | -0.965790 | 3.650850  |
| 58 | 1 | 0 | -0.164633 | -0.954242 | 3.048027  |
| 59 | 6 | 0 | -3.517633 | -1.214013 | 3.233374  |
| 60 | 1 | 0 | -4.844722 | -1.832412 | 1.662828  |
| 61 | 1 | 0 | -2.023816 | -0.682427 | 4.681495  |
| 62 | 6 | 0 | 1.179405  | 1.709518  | -2.640548 |
| 63 | 1 | 0 | 1.415911  | 2.179836  | -3.601946 |
| 64 | 1 | 0 | 1.148715  | 2.523727  | -1.906608 |
| 65 | 1 | 0 | -0.882631 | 1.662949  | -3.336512 |
| 66 | 1 | 0 | -0.085573 | 0.110732  | -3.357293 |
| 67 | 6 | 0 | -0.121005 | -2.861049 | 0.700358  |
| 68 | 8 | 0 | 0.954994  | -2.549306 | 1.246904  |
| 69 | 8 | 0 | -0.695385 | -3.795581 | 0.207876  |
| 70 | 9 | 0 | -4.526109 | -1.078958 | 4.122733  |

```

-----
SCF Done: E(RPBE1PBE) = -6931.97087758      A.U. after 1 cycles
          Convg = 0.3745D-08                -V/T = 2.0050
Zero-point correction= 0.551289 (Hartree/Particle)
Thermal correction to Energy= 0.596390
Thermal correction to Enthalpy= 0.597446
Thermal correction to Gibbs Free Energy= 0.465825
Sum of electronic and zero-point Energies= -6931.419589
Sum of electronic and thermal Energies= -6931.374487
Sum of electronic and thermal Enthalpies= -6931.373432
Sum of electronic and thermal Free Energies= -6931.505052

          1          2          3
          A          A          A
Frequencies --  -279.9314      17.7389      21.2301

```

DPPP-Rh-OOC(*p*-FPh)-conf2 (27)

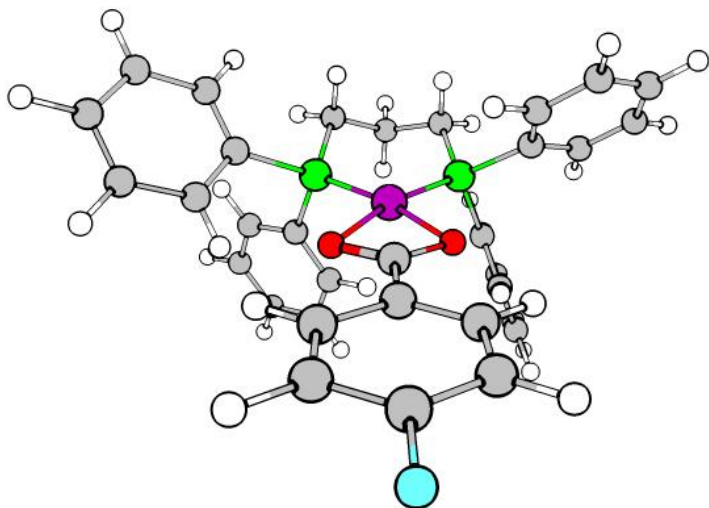

| Center Number | Atomic Number | Atomic Type | Coordinates (Angstroms) |           |           |
|---------------|---------------|-------------|-------------------------|-----------|-----------|
|               |               |             | X                       | Y         | Z         |
| 1             | 45            | 0           | 0.158833                | 0.037455  | -0.274085 |
| 2             | 15            | 0           | -1.240957               | -1.654613 | -0.650635 |
| 3             | 15            | 0           | -1.447471               | 1.541042  | -0.644583 |
| 4             | 6             | 0           | -2.775878               | 1.140782  | -1.856016 |
| 5             | 6             | 0           | -2.688076               | -1.421577 | -1.767197 |
| 6             | 1             | 0           | -2.311999               | 1.057001  | -2.845824 |
| 7             | 1             | 0           | -3.488376               | 1.972721  | -1.888526 |
| 8             | 6             | 0           | -0.793164               | 3.152249  | -1.223000 |
| 9             | 6             | 0           | -1.153099               | 3.741410  | -2.439755 |
| 10            | 6             | 0           | 0.131552                | 3.806713  | -0.397583 |
| 11            | 6             | 0           | -0.607377               | 4.967886  | -2.819788 |
| 12            | 1             | 0           | -1.862121               | 3.256685  | -3.104571 |
| 13            | 6             | 0           | 0.668695                | 5.032950  | -0.775500 |
| 14            | 1             | 0           | 0.439321                | 3.348632  | 0.538546  |
| 15            | 6             | 0           | 0.301210                | 5.617829  | -1.988012 |
| 16            | 1             | 0           | -0.896744               | 5.414440  | -3.767647 |
| 17            | 1             | 0           | 1.382519                | 5.530566  | -0.124233 |
| 18            | 1             | 0           | 0.724690                | 6.574058  | -2.283919 |
| 19            | 6             | 0           | -2.430435               | 2.029359  | 0.832170  |
| 20            | 6             | 0           | -3.268699               | 3.151818  | 0.811319  |
| 21            | 6             | 0           | -2.354894               | 1.256493  | 1.994393  |
| 22            | 6             | 0           | -4.027494               | 3.485057  | 1.929521  |
| 23            | 1             | 0           | -3.318353               | 3.780248  | -0.075553 |
| 24            | 6             | 0           | -3.117012               | 1.589651  | 3.114564  |
| 25            | 1             | 0           | -1.689905               | 0.395861  | 2.016227  |
| 26            | 6             | 0           | -3.954721               | 2.701934  | 3.083265  |
| 27            | 1             | 0           | -4.671041               | 4.360804  | 1.904770  |
| 28            | 1             | 0           | -3.049872               | 0.979877  | 4.011779  |
| 29            | 1             | 0           | -4.545446               | 2.965262  | 3.956926  |
| 30            | 6             | 0           | -0.428543               | -3.097735 | -1.444290 |
| 31            | 6             | 0           | 0.711227                | -2.885203 | -2.226791 |
| 32            | 6             | 0           | -0.950313               | -4.391860 | -1.329701 |
| 33            | 6             | 0           | 1.310600                | -3.949467 | -2.898741 |
| 34            | 1             | 0           | 1.135315                | -1.885947 | -2.292196 |
| 35            | 6             | 0           | -0.348742               | -5.454242 | -1.999977 |
| 36            | 1             | 0           | -1.821784               | -4.576246 | -0.705572 |
| 37            | 6             | 0           | 0.781159                | -5.233909 | -2.788281 |
| 38            | 1             | 0           | 2.198355                | -3.774900 | -3.501027 |

|    |   |   |           |           |           |
|----|---|---|-----------|-----------|-----------|
| 39 | 1 | 0 | -0.759036 | -6.456129 | -1.902342 |
| 40 | 1 | 0 | 1.252194  | -6.064376 | -3.307919 |
| 41 | 6 | 0 | -1.925992 | -2.371767 | 0.893734  |
| 42 | 6 | 0 | -1.010642 | -2.631905 | 1.924946  |
| 43 | 6 | 0 | -3.280269 | -2.646082 | 1.106526  |
| 44 | 6 | 0 | -1.441746 | -3.167697 | 3.134106  |
| 45 | 1 | 0 | 0.043783  | -2.407229 | 1.775645  |
| 46 | 6 | 0 | -3.713395 | -3.171531 | 2.325113  |
| 47 | 1 | 0 | -4.015569 | -2.451651 | 0.330593  |
| 48 | 6 | 0 | -2.796574 | -3.436428 | 3.338978  |
| 49 | 1 | 0 | -0.719976 | -3.370019 | 3.921146  |
| 50 | 1 | 0 | -4.770299 | -3.374143 | 2.478080  |
| 51 | 1 | 0 | -3.134659 | -3.847800 | 4.286447  |
| 52 | 6 | 0 | -3.515292 | -0.157571 | -1.524352 |
| 53 | 1 | 0 | -4.403445 | -0.210948 | -2.164724 |
| 54 | 1 | 0 | -3.888663 | -0.122537 | -0.493974 |
| 55 | 1 | 0 | -3.320358 | -2.315836 | -1.729297 |
| 56 | 1 | 0 | -2.262096 | -1.394566 | -2.777250 |
| 57 | 6 | 0 | 2.610516  | 0.147181  | 0.336759  |
| 58 | 8 | 0 | 1.948317  | 1.224741  | 0.211704  |
| 59 | 8 | 0 | 2.044962  | -0.982524 | 0.179674  |
| 60 | 6 | 0 | 4.060608  | 0.206217  | 0.661829  |
| 61 | 6 | 0 | 4.791791  | -0.973287 | 0.828703  |
| 62 | 6 | 0 | 4.698658  | 1.442680  | 0.795364  |
| 63 | 6 | 0 | 6.149255  | -0.925779 | 1.128472  |
| 64 | 1 | 0 | 4.282353  | -1.925704 | 0.719123  |
| 65 | 6 | 0 | 6.055618  | 1.508277  | 1.093014  |
| 66 | 1 | 0 | 4.117973  | 2.349833  | 0.659334  |
| 67 | 6 | 0 | 6.752938  | 0.318316  | 1.254035  |
| 68 | 1 | 0 | 6.738598  | -1.827725 | 1.263212  |
| 69 | 1 | 0 | 6.574224  | 2.456246  | 1.199745  |
| 70 | 9 | 0 | 8.069366  | 0.373258  | 1.543015  |

```

-----
SCF Done:  E(RPBE1PBE) = -6932.02815958      A.U. after   1 cycles
              Conv =   0.6424D-08              -V/T =   2.0050
Zero-point correction=                        0.554255 (Hartree/Particle)
Thermal correction to Energy=                 0.599409
Thermal correction to Enthalpy=              0.600464
Thermal correction to Gibbs Free Energy=     0.464870
Sum of electronic and zero-point Energies=   -6931.473905
Sum of electronic and thermal Energies=      -6931.428750
Sum of electronic and thermal Enthalpies=    -6931.427695
Sum of electronic and thermal Free Energies= -6931.563290

              1              2              3
              A              A              A
Frequencies --   5.1268             18.4047             19.1167

```

DPPP-Rh-(*p*-CF<sub>3</sub>Ph) (28)

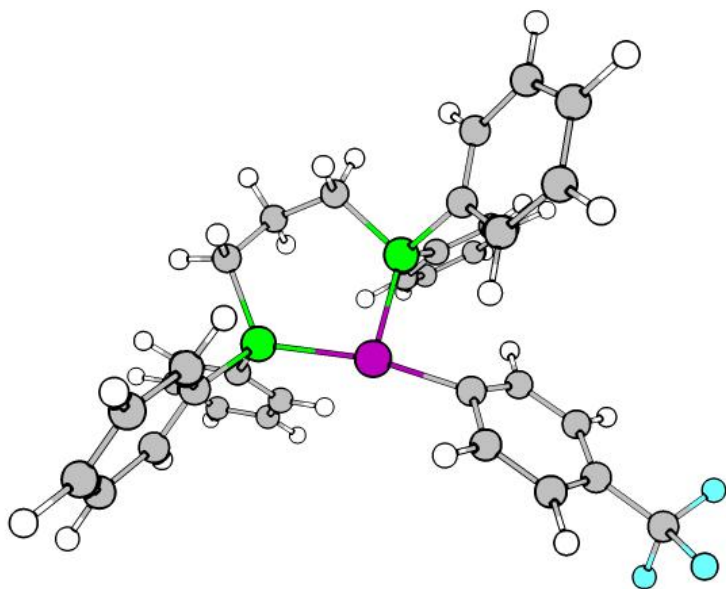

| Center Number | Atomic Number | Atomic Type | Coordinates (Angstroms) |           |           |
|---------------|---------------|-------------|-------------------------|-----------|-----------|
|               |               |             | X                       | Y         | Z         |
| 1             | 45            | 0           | -0.305564               | -0.400409 | 0.127277  |
| 2             | 15            | 0           | 0.154322                | 1.708636  | 0.601078  |
| 3             | 15            | 0           | -2.642131               | -0.221854 | 0.282795  |
| 4             | 6             | 0           | -3.321299               | 1.286430  | 1.100339  |
| 5             | 6             | 0           | -1.242568               | 2.794567  | 1.191123  |
| 6             | 1             | 0           | -3.173464               | 1.174338  | 2.180228  |
| 7             | 1             | 0           | -4.401742               | 1.342881  | 0.933942  |
| 8             | 6             | 0           | -3.419211               | -1.588221 | 1.235192  |
| 9             | 6             | 0           | -3.090132               | -1.701611 | 2.594536  |
| 10            | 6             | 0           | -4.230153               | -2.570137 | 0.655723  |
| 11            | 6             | 0           | -3.589102               | -2.749907 | 3.361922  |
| 12            | 1             | 0           | -2.425027               | -0.973455 | 3.054995  |
| 13            | 6             | 0           | -4.720600               | -3.626821 | 1.423611  |
| 14            | 1             | 0           | -4.480352               | -2.518133 | -0.400367 |
| 15            | 6             | 0           | -4.408434               | -3.717013 | 2.778006  |
| 16            | 1             | 0           | -3.328190               | -2.818557 | 4.414852  |
| 17            | 1             | 0           | -5.348466               | -4.381901 | 0.957510  |
| 18            | 1             | 0           | -4.792677               | -4.540184 | 3.374446  |
| 19            | 6             | 0           | -3.525675               | -0.227682 | -1.328034 |
| 20            | 6             | 0           | -4.907111               | -0.023940 | -1.449036 |
| 21            | 6             | 0           | -2.771387               | -0.440106 | -2.487705 |
| 22            | 6             | 0           | -5.516966               | -0.032570 | -2.700748 |
| 23            | 1             | 0           | -5.518984               | 0.130006  | -0.563267 |
| 24            | 6             | 0           | -3.380875               | -0.452110 | -3.742351 |
| 25            | 1             | 0           | -1.695744               | -0.588696 | -2.401164 |
| 26            | 6             | 0           | -4.754471               | -0.246873 | -3.850242 |
| 27            | 1             | 0           | -6.589499               | 0.125227  | -2.779925 |
| 28            | 1             | 0           | -2.780945               | -0.620068 | -4.632868 |
| 29            | 1             | 0           | -5.232419               | -0.253581 | -4.826326 |
| 30            | 6             | 0           | 1.378206                | 2.091775  | 1.924404  |
| 31            | 6             | 0           | 2.081796                | 1.055012  | 2.543025  |
| 32            | 6             | 0           | 1.584108                | 3.405673  | 2.374222  |
| 33            | 6             | 0           | 2.976659                | 1.320280  | 3.579794  |
| 34            | 1             | 0           | 1.924937                | 0.035572  | 2.202828  |
| 35            | 6             | 0           | 2.475128                | 3.671165  | 3.410556  |

|    |   |   |           |           |           |
|----|---|---|-----------|-----------|-----------|
| 36 | 1 | 0 | 1.055889  | 4.236181  | 1.913109  |
| 37 | 6 | 0 | 3.175436  | 2.627456  | 4.016485  |
| 38 | 1 | 0 | 3.517641  | 0.500443  | 4.045119  |
| 39 | 1 | 0 | 2.623759  | 4.695211  | 3.743689  |
| 40 | 1 | 0 | 3.871720  | 2.835038  | 4.824898  |
| 41 | 6 | 0 | 0.763063  | 2.652922  | -0.861387 |
| 42 | 6 | 0 | 1.972251  | 3.356473  | -0.889198 |
| 43 | 6 | 0 | -0.022893 | 2.625233  | -2.023218 |
| 44 | 6 | 0 | 2.372899  | 4.034221  | -2.041813 |
| 45 | 1 | 0 | 2.618875  | 3.367486  | -0.016675 |
| 46 | 6 | 0 | 0.368285  | 3.315752  | -3.166361 |
| 47 | 1 | 0 | -0.935707 | 2.033808  | -2.042563 |
| 48 | 6 | 0 | 1.569954  | 4.025162  | -3.179448 |
| 49 | 1 | 0 | 3.320412  | 4.567096  | -2.046962 |
| 50 | 1 | 0 | -0.258290 | 3.285370  | -4.054174 |
| 51 | 1 | 0 | 1.883584  | 4.554499  | -4.075335 |
| 52 | 6 | 0 | 1.637332  | -0.898784 | -0.141448 |
| 53 | 6 | 0 | 1.926810  | -2.143938 | 0.455436  |
| 54 | 6 | 0 | 2.595934  | -0.387348 | -1.034062 |
| 55 | 6 | 0 | 3.089419  | -2.854331 | 0.163333  |
| 56 | 1 | 0 | 1.230470  | -2.578425 | 1.175811  |
| 57 | 6 | 0 | 3.763992  | -1.084828 | -1.334428 |
| 58 | 1 | 0 | 2.429735  | 0.573485  | -1.516523 |
| 59 | 6 | 0 | 4.015794  | -2.319407 | -0.733081 |
| 60 | 1 | 0 | 3.282708  | -3.811560 | 0.641281  |
| 61 | 1 | 0 | 4.483974  | -0.665015 | -2.033003 |
| 62 | 6 | 0 | -2.634708 | 2.560897  | 0.604978  |
| 63 | 1 | 0 | -3.256758 | 3.414697  | 0.899010  |
| 64 | 1 | 0 | -2.608309 | 2.582147  | -0.490895 |
| 65 | 1 | 0 | -0.948062 | 3.832234  | 1.001383  |
| 66 | 1 | 0 | -1.282414 | 2.669136  | 2.279602  |
| 67 | 6 | 0 | 5.248359  | -3.085134 | -1.089015 |
| 68 | 9 | 0 | 6.294595  | -2.278412 | -1.367627 |
| 69 | 9 | 0 | 5.644359  | -3.916070 | -0.101976 |
| 70 | 9 | 0 | 5.074585  | -3.863536 | -2.187608 |

```

-----
SCF Done: E(RPBE1PBE) = -6981.18634240 A.U. after 1 cycles
          Conv = 0.2001D-08 -V/T = 2.0050
Zero-point correction= 0.551472 (Hartree/Particle)
Thermal correction to Energy= 0.596965
Thermal correction to Enthalpy= 0.598020
Thermal correction to Gibbs Free Energy= 0.460961
Sum of electronic and zero-point Energies= -6980.634871
Sum of electronic and thermal Energies= -6980.589377
Sum of electronic and thermal Enthalpies= -6980.588322
Sum of electronic and thermal Free Energies= -6980.725382

          1          2          3
          A          A          A
Frequencies -- 9.1798 13.1572 17.2868

```

DPPP-Rh-(*p*-CF<sub>3</sub>Ph)-CO<sub>2</sub> (29)

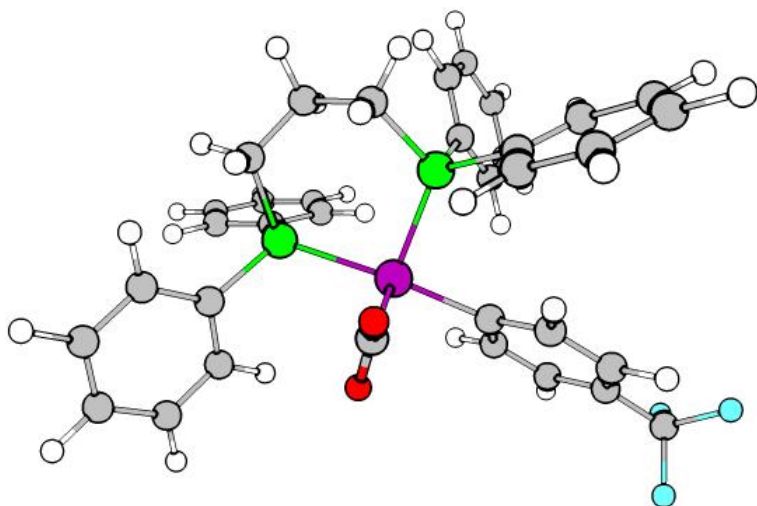

| Center Number | Atomic Number | Atomic Type | Coordinates (Angstroms) |           |           |
|---------------|---------------|-------------|-------------------------|-----------|-----------|
|               |               |             | X                       | Y         | Z         |
| 1             | 45            | 0           | -0.293335               | -0.583985 | 0.154124  |
| 2             | 15            | 0           | 0.220984                | 1.469247  | 0.961416  |
| 3             | 15            | 0           | -2.674299               | -0.203393 | 0.237787  |
| 4             | 6             | 0           | -3.275984               | 0.995187  | 1.498591  |
| 5             | 6             | 0           | -1.075691               | 2.202462  | 2.050810  |
| 6             | 1             | 0           | -3.180419               | 0.519586  | 2.481622  |
| 7             | 1             | 0           | -4.339110               | 1.194146  | 1.322784  |
| 8             | 6             | 0           | -3.718820               | -1.682386 | 0.486291  |
| 9             | 6             | 0           | -4.705918               | -1.777530 | 1.472983  |
| 10            | 6             | 0           | -3.496845               | -2.776617 | -0.360437 |
| 11            | 6             | 0           | -5.463741               | -2.941472 | 1.602451  |
| 12            | 1             | 0           | -4.897240               | -0.950305 | 2.150037  |
| 13            | 6             | 0           | -4.259431               | -3.932708 | -0.236240 |
| 14            | 1             | 0           | -2.717780               | -2.727536 | -1.116748 |
| 15            | 6             | 0           | -5.245344               | -4.018619 | 0.747091  |
| 16            | 1             | 0           | -6.225656               | -3.003196 | 2.375038  |
| 17            | 1             | 0           | -4.074222               | -4.773239 | -0.899465 |
| 18            | 1             | 0           | -5.835626               | -4.925189 | 0.850251  |
| 19            | 6             | 0           | -3.340776               | 0.511145  | -1.317719 |
| 20            | 6             | 0           | -4.699431               | 0.414146  | -1.645643 |
| 21            | 6             | 0           | -2.480527               | 1.196514  | -2.182337 |
| 22            | 6             | 0           | -5.186321               | 0.999083  | -2.811096 |
| 23            | 1             | 0           | -5.378279               | -0.133192 | -0.995821 |
| 24            | 6             | 0           | -2.969446               | 1.785777  | -3.348030 |
| 25            | 1             | 0           | -1.421564               | 1.275451  | -1.946486 |
| 26            | 6             | 0           | -4.322441               | 1.687888  | -3.663994 |
| 27            | 1             | 0           | -6.241433               | 0.913046  | -3.057417 |
| 28            | 1             | 0           | -2.289267               | 2.316547  | -4.008891 |
| 29            | 1             | 0           | -4.703925               | 2.141207  | -4.575092 |
| 30            | 6             | 0           | 1.660646                | 1.621001  | 2.084649  |
| 31            | 6             | 0           | 1.677862                | 0.830283  | 3.241950  |
| 32            | 6             | 0           | 2.710812                | 2.511883  | 1.846024  |
| 33            | 6             | 0           | 2.725406                | 0.944940  | 4.151914  |
| 34            | 1             | 0           | 0.891207                | 0.099607  | 3.417928  |
| 35            | 6             | 0           | 3.762242                | 2.616102  | 2.756456  |
| 36            | 1             | 0           | 2.717162                | 3.124937  | 0.949242  |
| 37            | 6             | 0           | 3.769911                | 1.838105  | 3.911882  |
| 38            | 1             | 0           | 2.730703                | 0.323940  | 5.043842  |

|    |   |   |           |           |           |
|----|---|---|-----------|-----------|-----------|
| 39 | 1 | 0 | 4.576745  | 3.307970  | 2.558537  |
| 40 | 1 | 0 | 4.590297  | 1.921235  | 4.619880  |
| 41 | 6 | 0 | 0.521494  | 2.736879  | -0.330409 |
| 42 | 6 | 0 | 1.265095  | 2.366002  | -1.459536 |
| 43 | 6 | 0 | 0.045613  | 4.050714  | -0.238044 |
| 44 | 6 | 0 | 1.531959  | 3.289039  | -2.467911 |
| 45 | 1 | 0 | 1.647824  | 1.351825  | -1.543372 |
| 46 | 6 | 0 | 0.301843  | 4.969450  | -1.254416 |
| 47 | 1 | 0 | -0.525672 | 4.376817  | 0.625714  |
| 48 | 6 | 0 | 1.045780  | 4.592174  | -2.370816 |
| 49 | 1 | 0 | 2.119302  | 2.986662  | -3.330858 |
| 50 | 1 | 0 | -0.079233 | 5.983681  | -1.169586 |
| 51 | 1 | 0 | 1.247126  | 5.311206  | -3.160372 |
| 52 | 6 | 0 | 1.671671  | -0.998743 | -0.246405 |
| 53 | 6 | 0 | 2.766407  | -1.183442 | 0.606909  |
| 54 | 6 | 0 | 1.870860  | -1.260809 | -1.614174 |
| 55 | 6 | 0 | 4.005379  | -1.600576 | 0.122418  |
| 56 | 1 | 0 | 2.664838  | -1.004346 | 1.673696  |
| 57 | 6 | 0 | 3.104533  | -1.670296 | -2.114277 |
| 58 | 1 | 0 | 1.046721  | -1.149523 | -2.321582 |
| 59 | 6 | 0 | 4.180155  | -1.834216 | -1.240947 |
| 60 | 1 | 0 | 3.229472  | -1.857750 | -3.177644 |
| 61 | 6 | 0 | -2.493032 | 2.308660  | 1.484987  |
| 62 | 1 | 0 | -3.042005 | 3.025750  | 2.105973  |
| 63 | 1 | 0 | -2.483936 | 2.735595  | 0.475298  |
| 64 | 1 | 0 | -0.712958 | 3.183849  | 2.375221  |
| 65 | 1 | 0 | -1.080625 | 1.579509  | 2.952755  |
| 66 | 6 | 0 | -0.335667 | -2.013890 | 1.602155  |
| 67 | 8 | 0 | -0.527081 | -2.814074 | 0.681760  |
| 68 | 8 | 0 | -0.220742 | -1.902837 | 2.798238  |
| 69 | 1 | 0 | 4.837887  | -1.733784 | 0.808651  |
| 70 | 6 | 0 | 5.498032  | -2.315598 | -1.758540 |
| 71 | 9 | 0 | 5.597430  | -3.667066 | -1.739316 |
| 72 | 9 | 0 | 6.536287  | -1.852217 | -1.032458 |
| 73 | 9 | 0 | 5.714542  | -1.941928 | -3.037816 |

```

-----
SCF Done: E(RPBE1PBE) = -7169.61873746 A.U. after 1 cycles
          Conv = 0.7933D-08 -V/T = 2.0052
Zero-point correction= 0.565378 (Hartree/Particle)
Thermal correction to Energy= 0.614509
Thermal correction to Enthalpy= 0.615564
Thermal correction to Gibbs Free Energy= 0.471786
Sum of electronic and zero-point Energies= -7169.053360
Sum of electronic and thermal Energies= -7169.004229
Sum of electronic and thermal Enthalpies= -7169.003174
Sum of electronic and thermal Free Energies= -7169.146952

          1          2          3
          A          A          A
Frequencies -- 4.3006 16.6651 20.8604

```

**DPPP-Rh-(*p*-CF<sub>3</sub>Ph)-CO<sub>2</sub>-TS2 (30)**

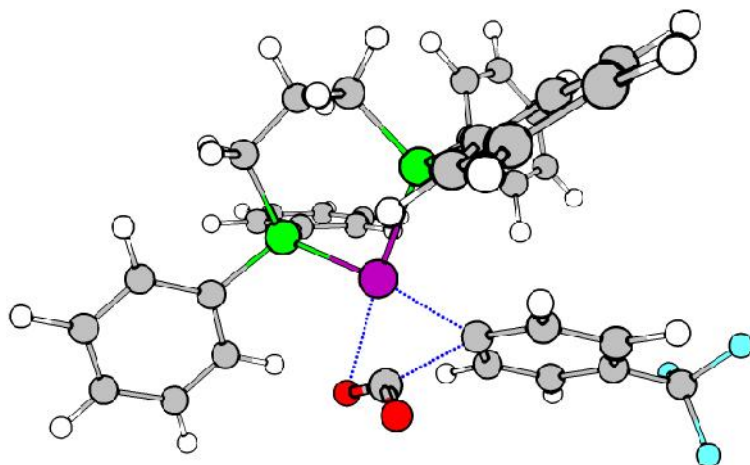

| Center Number | Atomic Number | Atomic Type | Coordinates (Angstroms) |           |           |
|---------------|---------------|-------------|-------------------------|-----------|-----------|
|               |               |             | X                       | Y         | Z         |
| 1             | 45            | 0           | -0.507226               | -0.670828 | 0.339909  |
| 2             | 15            | 0           | 0.221003                | 1.308800  | 1.154649  |
| 3             | 15            | 0           | -2.691713               | 0.104844  | 0.186934  |
| 4             | 6             | 0           | -3.273700               | 1.397724  | 1.358733  |
| 5             | 6             | 0           | -1.005446               | 2.311795  | 2.100608  |
| 6             | 1             | 0           | -3.338519               | 0.945438  | 2.354900  |
| 7             | 1             | 0           | -4.281561               | 1.713260  | 1.066649  |
| 8             | 6             | 0           | -3.946554               | -1.218674 | 0.316754  |
| 9             | 6             | 0           | -4.968726               | -1.221424 | 1.272198  |
| 10            | 6             | 0           | -3.855772               | -2.287162 | -0.585470 |
| 11            | 6             | 0           | -5.888943               | -2.268721 | 1.316983  |
| 12            | 1             | 0           | -5.064520               | -0.411144 | 1.988782  |
| 13            | 6             | 0           | -4.779195               | -3.326065 | -0.543788 |
| 14            | 1             | 0           | -3.055963               | -2.309301 | -1.320504 |
| 15            | 6             | 0           | -5.798536               | -3.320637 | 0.408720  |
| 16            | 1             | 0           | -6.678281               | -2.258241 | 2.064070  |
| 17            | 1             | 0           | -4.695480               | -4.148035 | -1.249566 |
| 18            | 1             | 0           | -6.515976               | -4.136057 | 0.445430  |
| 19            | 6             | 0           | -3.074442               | 0.870132  | -1.437571 |
| 20            | 6             | 0           | -4.397620               | 1.096414  | -1.838986 |
| 21            | 6             | 0           | -2.029126               | 1.259697  | -2.280566 |
| 22            | 6             | 0           | -4.667494               | 1.710217  | -3.058383 |
| 23            | 1             | 0           | -5.222204               | 0.777901  | -1.204713 |
| 24            | 6             | 0           | -2.300369               | 1.877110  | -3.501774 |
| 25            | 1             | 0           | -1.000063               | 1.075765  | -1.979238 |
| 26            | 6             | 0           | -3.618223               | 2.103757  | -3.891280 |
| 27            | 1             | 0           | -5.697415               | 1.876590  | -3.363277 |
| 28            | 1             | 0           | -1.479359               | 2.176750  | -4.147742 |
| 29            | 1             | 0           | -3.830656               | 2.580309  | -4.844721 |
| 30            | 6             | 0           | 1.515801                | 1.185041  | 2.449716  |
| 31            | 6             | 0           | 1.322029                | 0.246941  | 3.472052  |
| 32            | 6             | 0           | 2.645550                | 2.006811  | 2.478465  |
| 33            | 6             | 0           | 2.239419                | 0.142261  | 4.513799  |
| 34            | 1             | 0           | 0.466556                | -0.425222 | 3.433553  |
| 35            | 6             | 0           | 3.568187                | 1.893542  | 3.518708  |
| 36            | 1             | 0           | 2.816051                | 2.729396  | 1.684744  |
| 37            | 6             | 0           | 3.365829                | 0.965703  | 4.538441  |
| 38            | 1             | 0           | 2.083007                | -0.595047 | 5.296602  |
| 39            | 1             | 0           | 4.448513                | 2.531055  | 3.528090  |
| 40            | 1             | 0           | 4.087913                | 0.877139  | 5.345850  |



|    |   |   |           |           |           |
|----|---|---|-----------|-----------|-----------|
| 41 | 6 | 0 | 0.921682  | 2.473120  | -0.080135 |
| 42 | 6 | 0 | 1.756526  | 1.946930  | -1.076399 |
| 43 | 6 | 0 | 0.660263  | 3.848522  | -0.079054 |
| 44 | 6 | 0 | 2.326070  | 2.778290  | -2.037059 |
| 45 | 1 | 0 | 1.960355  | 0.879527  | -1.101553 |
| 46 | 6 | 0 | 1.219603  | 4.678307  | -1.050284 |
| 47 | 1 | 0 | 0.018922  | 4.292538  | 0.676217  |
| 48 | 6 | 0 | 2.055976  | 4.146602  | -2.029260 |
| 49 | 1 | 0 | 2.977598  | 2.353336  | -2.796083 |
| 50 | 1 | 0 | 1.000548  | 5.742770  | -1.038113 |
| 51 | 1 | 0 | 2.493560  | 4.794538  | -2.784072 |
| 52 | 6 | 0 | 1.422541  | -1.553941 | -0.018356 |
| 53 | 6 | 0 | 2.627105  | -1.395947 | 0.681305  |
| 54 | 6 | 0 | 1.494804  | -1.856597 | -1.389152 |
| 55 | 6 | 0 | 3.853016  | -1.455228 | 0.028930  |
| 56 | 1 | 0 | 2.609169  | -1.239574 | 1.755258  |
| 57 | 6 | 0 | 2.716541  | -1.915005 | -2.056390 |
| 58 | 1 | 0 | 0.581117  | -2.054275 | -1.945188 |
| 59 | 6 | 0 | 3.896456  | -1.697781 | -1.345817 |
| 60 | 1 | 0 | 4.774269  | -1.309679 | 0.586248  |
| 61 | 1 | 0 | 2.749055  | -2.129731 | -3.121224 |
| 62 | 6 | 0 | -2.337567 | 2.605244  | 1.410584  |
| 63 | 1 | 0 | -2.842679 | 3.395783  | 1.977332  |
| 64 | 1 | 0 | -2.181543 | 3.009585  | 0.403432  |
| 65 | 1 | 0 | -0.514537 | 3.238127  | 2.417987  |
| 66 | 1 | 0 | -1.184001 | 1.742856  | 3.020769  |
| 67 | 6 | 0 | 0.076005  | -2.688107 | 0.941997  |
| 68 | 8 | 0 | -0.860893 | -2.830922 | 0.131693  |
| 69 | 8 | 0 | 0.568788  | -3.202487 | 1.911081  |
| 70 | 6 | 0 | 5.217370  | -1.800514 | -2.046199 |
| 71 | 9 | 0 | 6.165153  | -1.040323 | -1.462893 |
| 72 | 9 | 0 | 5.140485  | -1.414876 | -3.336730 |
| 73 | 9 | 0 | 5.692630  | -3.066647 | -2.054175 |

```

-----
SCF Done: E(RPBE1PBE) = -7169.59963045 A.U. after 1 cycles
          Convg = 0.2722D-08 -V/T = 2.0051
Zero-point correction= 0.564282 (Hartree/Particle)
Thermal correction to Energy= 0.612816
Thermal correction to Enthalpy= 0.613871
Thermal correction to Gibbs Free Energy= 0.471906
Sum of electronic and zero-point Energies= -7169.035348
Sum of electronic and thermal Energies= -7168.986815
Sum of electronic and thermal Enthalpies= -7168.985760
Sum of electronic and thermal Free Energies= -7169.127724

          1          2          3
          A          A          A
Frequencies -- -294.2760          12.5649          15.2575

```

DPPP-Rh-OOC(*p*-CF<sub>3</sub>Ph)-conf2 (31)

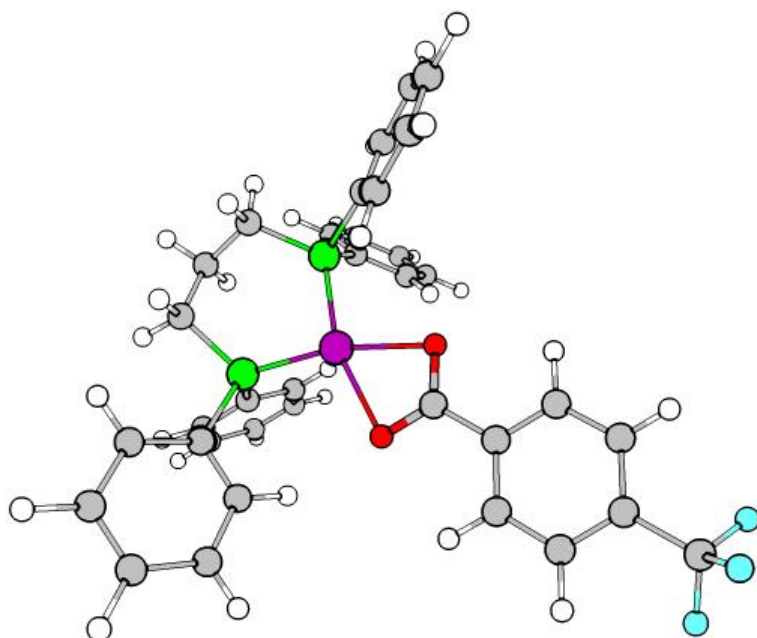

| Center Number | Atomic Number | Atomic Type | Coordinates (Angstroms) |           |           |
|---------------|---------------|-------------|-------------------------|-----------|-----------|
|               |               |             | X                       | Y         | Z         |
| 1             | 45            | 0           | -0.499455               | 0.042368  | -0.379387 |
| 2             | 15            | 0           | -1.913511               | -1.665241 | -0.573641 |
| 3             | 15            | 0           | -2.153207               | 1.536019  | -0.537455 |
| 4             | 6             | 0           | -3.672449               | 1.109498  | -1.491543 |
| 5             | 6             | 0           | -3.520337               | -1.448129 | -1.444216 |
| 6             | 1             | 0           | -3.398612               | 1.038527  | -2.550737 |
| 7             | 1             | 0           | -4.393991               | 1.927393  | -1.385688 |
| 8             | 6             | 0           | -1.607265               | 3.129836  | -1.258087 |
| 9             | 6             | 0           | -2.209459               | 3.725349  | -2.371385 |
| 10            | 6             | 0           | -0.512420               | 3.764489  | -0.655364 |
| 11            | 6             | 0           | -1.731270               | 4.938035  | -2.868494 |
| 12            | 1             | 0           | -3.056188               | 3.255283  | -2.863008 |
| 13            | 6             | 0           | -0.042301               | 4.977271  | -1.148532 |
| 14            | 1             | 0           | -0.018473               | 3.298997  | 0.193233  |
| 15            | 6             | 0           | -0.649669               | 5.567842  | -2.257348 |
| 16            | 1             | 0           | -2.208492               | 5.389707  | -3.734396 |
| 17            | 1             | 0           | 0.806655                | 5.459027  | -0.670575 |
| 18            | 1             | 0           | -0.278491               | 6.512868  | -2.645138 |
| 19            | 6             | 0           | -2.868328               | 2.056673  | 1.075654  |
| 20            | 6             | 0           | -3.659274               | 3.208074  | 1.183285  |
| 21            | 6             | 0           | -2.632835               | 1.280907  | 2.214820  |
| 22            | 6             | 0           | -4.213155               | 3.569859  | 2.407891  |
| 23            | 1             | 0           | -3.829599               | 3.837060  | 0.311863  |
| 24            | 6             | 0           | -3.190247               | 1.642979  | 3.441444  |
| 25            | 1             | 0           | -2.003032               | 0.397105  | 2.134850  |
| 26            | 6             | 0           | -3.980721               | 2.785752  | 3.539495  |
| 27            | 1             | 0           | -4.820555               | 4.468282  | 2.482293  |
| 28            | 1             | 0           | -2.999530               | 1.032914  | 4.320544  |
| 29            | 1             | 0           | -4.410131               | 3.071672  | 4.496262  |
| 30            | 6             | 0           | -1.205123               | -3.085904 | -1.494217 |
| 31            | 6             | 0           | -0.235337               | -2.840668 | -2.472336 |
| 32            | 6             | 0           | -1.646208               | -4.396933 | -1.279145 |
| 33            | 6             | 0           | 0.273089                | -3.889838 | -3.236265 |

|    |   |   |           |           |           |
|----|---|---|-----------|-----------|-----------|
| 34 | 1 | 0 | 0.129460  | -1.826904 | -2.621813 |
| 35 | 6 | 0 | -1.134576 | -5.444352 | -2.041520 |
| 36 | 1 | 0 | -2.382568 | -4.605284 | -0.506285 |
| 37 | 6 | 0 | -0.176210 | -5.191964 | -3.023372 |
| 38 | 1 | 0 | 1.028865  | -3.689702 | -3.991285 |
| 39 | 1 | 0 | -1.480683 | -6.459578 | -1.865036 |
| 40 | 1 | 0 | 0.225130  | -6.010764 | -3.614929 |
| 41 | 6 | 0 | -2.341850 | -2.398388 | 1.053249  |
| 42 | 6 | 0 | -1.277099 | -2.631572 | 1.937062  |
| 43 | 6 | 0 | -3.641684 | -2.710893 | 1.462561  |
| 44 | 6 | 0 | -1.509752 | -3.179596 | 3.194315  |
| 45 | 1 | 0 | -0.263540 | -2.375507 | 1.634031  |
| 46 | 6 | 0 | -3.874979 | -3.248303 | 2.729517  |
| 47 | 1 | 0 | -4.488981 | -2.537995 | 0.804860  |
| 48 | 6 | 0 | -2.811238 | -3.487308 | 3.595566  |
| 49 | 1 | 0 | -0.674377 | -3.360675 | 3.865583  |
| 50 | 1 | 0 | -4.891578 | -3.480732 | 3.036082  |
| 51 | 1 | 0 | -2.993952 | -3.908127 | 4.580807  |
| 52 | 6 | 0 | -4.312791 | -0.204182 | -1.038268 |
| 53 | 1 | 0 | -5.305668 | -0.271409 | -1.497821 |
| 54 | 1 | 0 | -4.481691 | -0.184965 | 0.045057  |
| 55 | 1 | 0 | -4.122976 | -2.355007 | -1.320712 |
| 56 | 1 | 0 | -3.266131 | -1.396584 | -2.509501 |
| 57 | 6 | 0 | 2.005080  | 0.125258  | -0.013911 |
| 58 | 8 | 0 | 1.358600  | 1.215477  | -0.069721 |
| 59 | 8 | 0 | 1.412972  | -0.993773 | -0.132136 |
| 60 | 6 | 0 | 3.483023  | 0.152135  | 0.190239  |
| 61 | 6 | 0 | 4.202331  | -1.043851 | 0.250665  |
| 62 | 6 | 0 | 4.148911  | 1.372372  | 0.321192  |
| 63 | 6 | 0 | 5.578790  | -1.021776 | 0.442016  |
| 64 | 1 | 0 | 3.669015  | -1.983654 | 0.146743  |
| 65 | 6 | 0 | 5.525690  | 1.400001  | 0.512810  |
| 66 | 1 | 0 | 3.574859  | 2.292364  | 0.271686  |
| 67 | 6 | 0 | 6.236819  | 0.201626  | 0.575317  |
| 68 | 1 | 0 | 6.138114  | -1.951296 | 0.494715  |
| 69 | 1 | 0 | 6.043943  | 2.348043  | 0.620873  |
| 70 | 6 | 0 | 7.728888  | 0.225556  | 0.735168  |
| 71 | 9 | 0 | 8.182440  | -0.835792 | 1.429552  |
| 72 | 9 | 0 | 8.156245  | 1.331316  | 1.373087  |
| 73 | 9 | 0 | 8.361382  | 0.200917  | -0.460239 |

-----

SCF Done: E(RPBE1PBE) = -7169.65573953 A.U. after 1 cycles  
 Convrg = 0.1497D-08 -V/T = 2.0051

Zero-point correction= 0.567257 (Hartree/Particle)  
 Thermal correction to Energy= 0.615776  
 Thermal correction to Enthalpy= 0.616831  
 Thermal correction to Gibbs Free Energy= 0.472425  
 Sum of electronic and zero-point Energies= -7169.088483  
 Sum of electronic and thermal Energies= -7169.039963  
 Sum of electronic and thermal Enthalpies= -7169.038908  
 Sum of electronic and thermal Free Energies= -7169.183315

|                | 1      | 2       | 3       |
|----------------|--------|---------|---------|
|                | A      | A       | A       |
| Frequencies -- | 9.3496 | 10.2189 | 14.2118 |

**(*p*-MeO)dppp-Rh catalyst  
 (*p*-MeO)DPPP-Rh-Ph (32)**

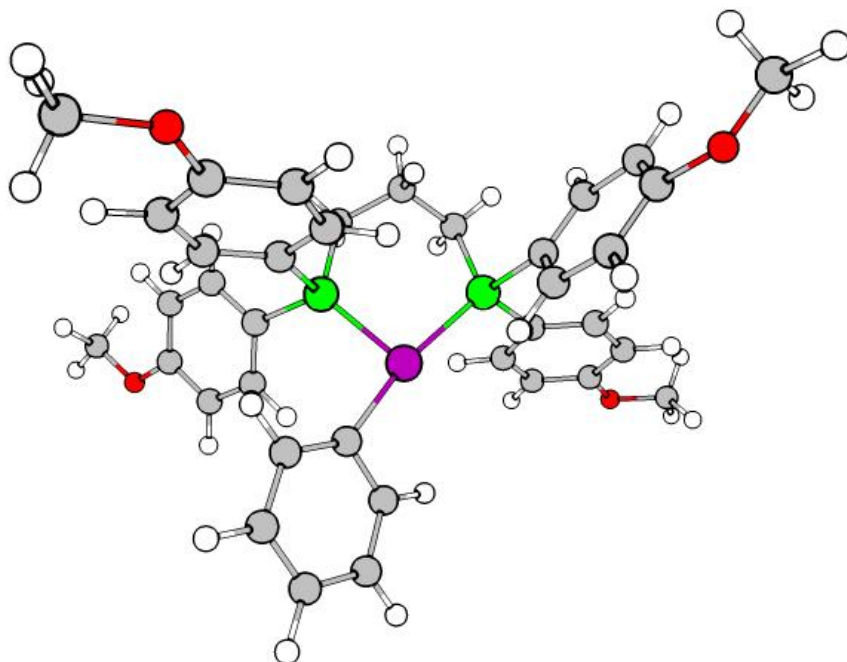

| Center Number | Atomic Number | Atomic Type | Coordinates (Angstroms) |           |           |
|---------------|---------------|-------------|-------------------------|-----------|-----------|
|               |               |             | X                       | Y         | Z         |
| 1             | 45            | 0           | 0.093360                | -0.514424 | 0.798517  |
| 2             | 15            | 0           | -1.478684               | -0.125033 | -0.704492 |
| 3             | 15            | 0           | 1.928392                | -0.258009 | -0.643080 |
| 4             | 6             | 0           | 1.575749                | -0.307775 | -2.453223 |
| 5             | 6             | 0           | -0.977275               | -0.060994 | -2.499589 |
| 6             | 1             | 0           | 1.377362                | -1.355317 | -2.708132 |
| 7             | 1             | 0           | 2.465136                | -0.014810 | -3.020486 |
| 8             | 6             | 0           | 3.247476                | -1.525264 | -0.476933 |
| 9             | 6             | 0           | 2.847323                | -2.873190 | -0.467423 |
| 10            | 6             | 0           | 4.604520                | -1.246079 | -0.316950 |
| 11            | 6             | 0           | 3.771278                | -3.896616 | -0.336503 |
| 12            | 1             | 0           | 1.789974                | -3.119960 | -0.552127 |
| 13            | 6             | 0           | 5.547612                | -2.266447 | -0.170738 |
| 14            | 1             | 0           | 4.948537                | -0.215477 | -0.292589 |
| 15            | 6             | 0           | 5.133251                | -3.599754 | -0.186748 |
| 16            | 1             | 0           | 3.459305                | -4.937427 | -0.331005 |
| 17            | 1             | 0           | 6.592440                | -2.003912 | -0.042264 |
| 18            | 6             | 0           | 2.803396                | 1.341827  | -0.438609 |
| 19            | 6             | 0           | 3.686055                | 1.885114  | -1.375864 |
| 20            | 6             | 0           | 2.569907                | 2.073732  | 0.736796  |
| 21            | 6             | 0           | 4.320350                | 3.109202  | -1.163827 |
| 22            | 1             | 0           | 3.902229                | 1.354954  | -2.299927 |
| 23            | 6             | 0           | 3.195282                | 3.289025  | 0.968780  |
| 24            | 1             | 0           | 1.872296                | 1.683796  | 1.476316  |
| 25            | 6             | 0           | 4.076409                | 3.817948  | 0.016952  |
| 26            | 1             | 0           | 4.995316                | 3.492819  | -1.921723 |
| 27            | 1             | 0           | 3.008763                | 3.851220  | 1.879528  |
| 28            | 6             | 0           | -2.876195               | -1.313985 | -0.842902 |
| 29            | 6             | 0           | -3.020987               | -2.344280 | 0.097067  |
| 30            | 6             | 0           | -3.788851               | -1.270295 | -1.903061 |
| 31            | 6             | 0           | -4.040950               | -3.278376 | -0.008501 |

|    |   |   |           |           |           |
|----|---|---|-----------|-----------|-----------|
| 32 | 1 | 0 | -2.316301 | -2.405803 | 0.921959  |
| 33 | 6 | 0 | -4.818570 | -2.202282 | -2.026228 |
| 34 | 1 | 0 | -3.714723 | -0.497481 | -2.663927 |
| 35 | 6 | 0 | -4.949986 | -3.214675 | -1.070573 |
| 36 | 1 | 0 | -4.148325 | -4.072261 | 0.725526  |
| 37 | 1 | 0 | -5.501431 | -2.125836 | -2.865885 |
| 38 | 6 | 0 | -2.281232 | 1.519397  | -0.492553 |
| 39 | 6 | 0 | -3.658519 | 1.738676  | -0.528442 |
| 40 | 6 | 0 | -1.449349 | 2.628526  | -0.259368 |
| 41 | 6 | 0 | -4.202462 | 3.015509  | -0.364133 |
| 42 | 1 | 0 | -4.340470 | 0.904421  | -0.666047 |
| 43 | 6 | 0 | -1.970951 | 3.903070  | -0.114014 |
| 44 | 1 | 0 | -0.375179 | 2.482250  | -0.165256 |
| 45 | 6 | 0 | -3.356429 | 4.108010  | -0.167531 |
| 46 | 1 | 0 | -5.280714 | 3.134735  | -0.385720 |
| 47 | 1 | 0 | -1.322047 | 4.756107  | 0.064827  |
| 48 | 6 | 0 | -1.193125 | -0.661295 | 2.348161  |
| 49 | 6 | 0 | -0.523164 | -1.449569 | 3.303482  |
| 50 | 6 | 0 | -2.368867 | -0.016059 | 2.763045  |
| 51 | 6 | 0 | -0.983061 | -1.574309 | 4.617001  |
| 52 | 1 | 0 | 0.389142  | -1.991261 | 3.026419  |
| 53 | 6 | 0 | -2.837691 | -0.136134 | 4.073355  |
| 54 | 1 | 0 | -2.925473 | 0.604935  | 2.062982  |
| 55 | 6 | 0 | -2.149538 | -0.914577 | 5.006011  |
| 56 | 1 | 0 | -0.439467 | -2.190518 | 5.330944  |
| 57 | 1 | 0 | -3.745231 | 0.386125  | 4.371540  |
| 58 | 1 | 0 | -2.519863 | -1.008530 | 6.024159  |
| 59 | 6 | 0 | 0.377100  | 0.564151  | -2.832802 |
| 60 | 1 | 0 | 0.404102  | 0.727629  | -3.917006 |
| 61 | 1 | 0 | 0.468197  | 1.560020  | -2.381956 |
| 62 | 1 | 0 | -1.761553 | 0.482320  | -3.037852 |
| 63 | 1 | 0 | -0.997602 | -1.096432 | -2.859858 |
| 64 | 8 | 0 | 5.962450  | -4.668166 | -0.055739 |
| 65 | 8 | 0 | 4.636563  | 5.014774  | 0.324328  |
| 66 | 8 | 0 | -3.774815 | 5.391130  | -0.006100 |
| 67 | 8 | 0 | -5.913231 | -4.171925 | -1.092997 |
| 68 | 6 | 0 | 7.344939  | -4.413389 | 0.119960  |
| 69 | 1 | 0 | 7.532714  | -3.837463 | 1.033261  |
| 70 | 1 | 0 | 7.820347  | -5.390139 | 0.207577  |
| 71 | 1 | 0 | 7.766787  | -3.882937 | -0.741388 |
| 72 | 6 | 0 | 5.530714  | 5.589307  | -0.613350 |
| 73 | 1 | 0 | 5.033420  | 5.789750  | -1.569033 |
| 74 | 1 | 0 | 5.858079  | 6.531625  | -0.174843 |
| 75 | 1 | 0 | 6.402677  | 4.946818  | -0.779724 |
| 76 | 6 | 0 | -5.169210 | 5.638163  | -0.032727 |
| 77 | 1 | 0 | -5.685257 | 5.107689  | 0.775554  |
| 78 | 1 | 0 | -5.285902 | 6.712186  | 0.111454  |
| 79 | 1 | 0 | -5.607692 | 5.353962  | -0.996304 |
| 80 | 6 | 0 | -6.853550 | -4.139586 | -2.151900 |
| 81 | 1 | 0 | -7.527686 | -4.978271 | -1.978984 |
| 82 | 1 | 0 | -7.429627 | -3.207233 | -2.147280 |
| 83 | 1 | 0 | -6.365220 | -4.264459 | -3.125093 |

-----

SCF Done: E(RPBE1PBE) = -7102.04157197 A.U. after 1 cycles  
Convrg = 0.3124D-08 -V/T = 2.0052

Zero-point correction= 0.678569 (Hartree/Particle)  
Thermal correction to Energy= 0.732084  
Thermal correction to Enthalpy= 0.733139  
Thermal correction to Gibbs Free Energy= 0.579962  
Sum of electronic and zero-point Energies= -7101.363003  
Sum of electronic and thermal Energies= -7101.309488  
Sum of electronic and thermal Enthalpies= -7101.308433  
Sum of electronic and thermal Free Energies= -7101.461610

|                |        |         |         |
|----------------|--------|---------|---------|
|                | 1      | 2       | 3       |
|                | A      | A       | A       |
| Frequencies -- | 7.6720 | 12.5698 | 21.4306 |

**(*p*-MeO)DPPP-Rh-Ph-CO<sub>2</sub> (33)**

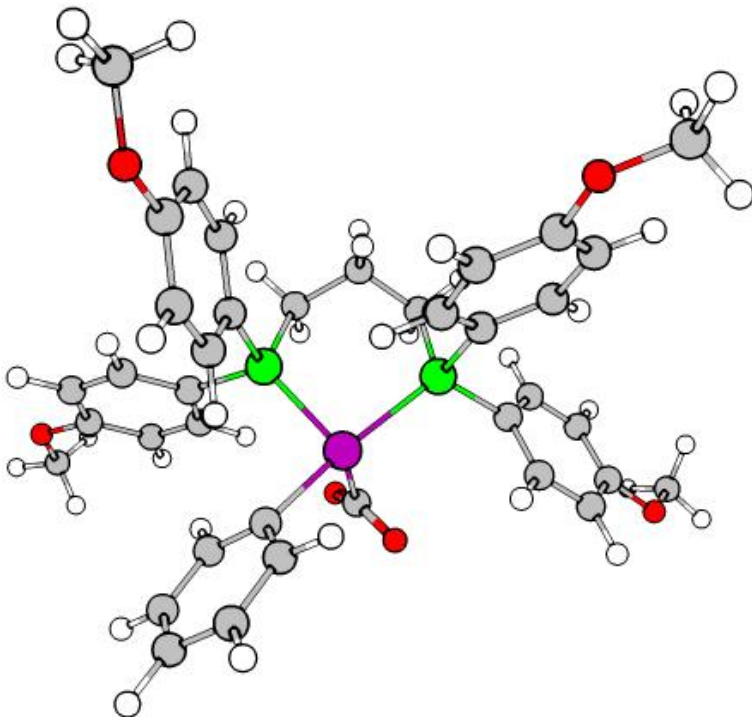

| Center Number | Atomic Number | Atomic Type | Coordinates (Angstroms) |           |           |
|---------------|---------------|-------------|-------------------------|-----------|-----------|
|               |               |             | X                       | Y         | Z         |
| 1             | 45            | 0           | -0.014750               | -0.794938 | 0.717592  |
| 2             | 15            | 0           | -1.506587               | 0.031554  | -0.774366 |
| 3             | 15            | 0           | 1.905614                | -0.292614 | -0.654636 |
| 4             | 6             | 0           | 1.626422                | -0.244050 | -2.474554 |
| 5             | 6             | 0           | -0.933113               | -0.033486 | -2.528309 |
| 6             | 1             | 0           | 1.474373                | -1.274341 | -2.816917 |
| 7             | 1             | 0           | 2.526057                | 0.145790  | -2.964396 |
| 8             | 6             | 0           | 3.352905                | -1.384975 | -0.459867 |
| 9             | 6             | 0           | 4.013184                | -2.004653 | -1.520563 |
| 10            | 6             | 0           | 3.822183                | -1.626954 | 0.842440  |
| 11            | 6             | 0           | 5.116782                | -2.834094 | -1.308282 |
| 12            | 1             | 0           | 3.681078                | -1.855462 | -2.543723 |
| 13            | 6             | 0           | 4.921343                | -2.435170 | 1.067870  |
| 14            | 1             | 0           | 3.313276                | -1.180936 | 1.692956  |
| 15            | 6             | 0           | 5.578440                | -3.048577 | -0.008304 |
| 16            | 1             | 0           | 5.597797                | -3.300167 | -2.161606 |
| 17            | 1             | 0           | 5.280202                | -2.623619 | 2.075646  |
| 18            | 6             | 0           | 2.594227                | 1.372001  | -0.317387 |
| 19            | 6             | 0           | 3.908626                | 1.712191  | -0.648809 |
| 20            | 6             | 0           | 1.787160                | 2.355951  | 0.273141  |
| 21            | 6             | 0           | 4.411627                | 2.990011  | -0.413728 |
| 22            | 1             | 0           | 4.567995                | 0.965570  | -1.086119 |
| 23            | 6             | 0           | 2.270710                | 3.634021  | 0.509613  |
| 24            | 1             | 0           | 0.761778                | 2.124659  | 0.553681  |
| 25            | 6             | 0           | 3.588438                | 3.961234  | 0.167477  |

|    |   |   |           |           |           |
|----|---|---|-----------|-----------|-----------|
| 26 | 1 | 0 | 5.440349  | 3.210105  | -0.678962 |
| 27 | 1 | 0 | 1.642797  | 4.393529  | 0.966988  |
| 28 | 6 | 0 | -3.117648 | -0.808897 | -0.965835 |
| 29 | 6 | 0 | -3.125784 | -2.179939 | -1.238868 |
| 30 | 6 | 0 | -4.343586 | -0.136029 | -0.882365 |
| 31 | 6 | 0 | -4.320288 | -2.868672 | -1.441147 |
| 32 | 1 | 0 | -2.190823 | -2.736732 | -1.261100 |
| 33 | 6 | 0 | -5.539163 | -0.813126 | -1.073650 |
| 34 | 1 | 0 | -4.370721 | 0.926825  | -0.658492 |
| 35 | 6 | 0 | -5.537038 | -2.184129 | -1.357794 |
| 36 | 1 | 0 | -4.284289 | -3.933802 | -1.643543 |
| 37 | 1 | 0 | -6.491811 | -0.295510 | -1.002858 |
| 38 | 6 | 0 | -1.940164 | 1.785387  | -0.490182 |
| 39 | 6 | 0 | -2.168777 | 2.214935  | 0.828836  |
| 40 | 6 | 0 | -2.058418 | 2.728196  | -1.513817 |
| 41 | 6 | 0 | -2.503779 | 3.529613  | 1.106829  |
| 42 | 1 | 0 | -2.093068 | 1.503380  | 1.647700  |
| 43 | 6 | 0 | -2.383703 | 4.058628  | -1.248502 |
| 44 | 1 | 0 | -1.900434 | 2.445088  | -2.550309 |
| 45 | 6 | 0 | -2.608012 | 4.466518  | 0.069373  |
| 46 | 1 | 0 | -2.686647 | 3.855026  | 2.127118  |
| 47 | 1 | 0 | -2.458548 | 4.757405  | -2.074876 |
| 48 | 6 | 0 | -1.458410 | -1.034902 | 2.151927  |
| 49 | 6 | 0 | -2.606732 | -1.832637 | 2.205250  |
| 50 | 6 | 0 | -1.103472 | -0.332238 | 3.317100  |
| 51 | 6 | 0 | -3.372722 | -1.921924 | 3.370907  |
| 52 | 1 | 0 | -2.915641 | -2.403187 | 1.333457  |
| 53 | 6 | 0 | -1.868692 | -0.408967 | 4.482778  |
| 54 | 1 | 0 | -0.205524 | 0.290219  | 3.332069  |
| 55 | 6 | 0 | -3.012671 | -1.206895 | 4.512267  |
| 56 | 1 | 0 | -1.567227 | 0.148217  | 5.367721  |
| 57 | 6 | 0 | 0.416070  | 0.607300  | -2.858939 |
| 58 | 1 | 0 | 0.450701  | 0.762284  | -3.943644 |
| 59 | 1 | 0 | 0.498165  | 1.605319  | -2.412201 |
| 60 | 1 | 0 | -1.728858 | 0.397985  | -3.145859 |
| 61 | 1 | 0 | -0.911594 | -1.099940 | -2.781388 |
| 62 | 6 | 0 | 0.211514  | -2.802039 | 0.546145  |
| 63 | 8 | 0 | 0.958006  | -2.733581 | 1.528946  |
| 64 | 8 | 0 | -0.257036 | -3.570163 | -0.262866 |
| 65 | 1 | 0 | -4.257827 | -2.555075 | 3.384854  |
| 66 | 8 | 0 | 3.975646  | 5.232298  | 0.440860  |
| 67 | 8 | 0 | 6.641435  | -3.828441 | 0.313393  |
| 68 | 8 | 0 | -2.927140 | 5.730252  | 0.439778  |
| 69 | 8 | 0 | -6.755699 | -2.757585 | -1.530061 |
| 70 | 6 | 0 | 7.309743  | -4.502961 | -0.738233 |
| 71 | 1 | 0 | 8.107523  | -5.076032 | -0.266291 |
| 72 | 1 | 0 | 6.635802  | -5.188173 | -1.264508 |
| 73 | 1 | 0 | 7.747614  | -3.796285 | -1.452553 |
| 74 | 6 | 0 | 5.308546  | 5.602002  | 0.129879  |
| 75 | 1 | 0 | 6.031338  | 4.995441  | 0.686778  |
| 76 | 1 | 0 | 5.506617  | 5.516886  | -0.944528 |
| 77 | 1 | 0 | 5.406849  | 6.644513  | 0.431391  |
| 78 | 6 | 0 | -3.044273 | 6.711579  | -0.577301 |
| 79 | 1 | 0 | -3.301482 | 7.639636  | -0.067676 |
| 80 | 1 | 0 | -2.098339 | 6.844184  | -1.114038 |
| 81 | 1 | 0 | -3.839158 | 6.457109  | -1.287156 |
| 82 | 6 | 0 | -6.800442 | -4.150949 | -1.786918 |
| 83 | 1 | 0 | -7.856501 | -4.403757 | -1.879206 |
| 84 | 1 | 0 | -6.286241 | -4.402225 | -2.721468 |
| 85 | 1 | 0 | -6.362607 | -4.723239 | -0.961554 |
| 86 | 1 | 0 | -3.612509 | -1.274640 | 5.416734  |

-----  
SCF Done: E(RPBE1PBE) = -7290.47615437 A.U. after 1 cycles

```

Convrg = 0.6163D-08 -V/T = 2.0054
Zero-point correction= 0.692199 (Hartree/Particle)
Thermal correction to Energy= 0.749473
Thermal correction to Enthalpy= 0.750528
Thermal correction to Gibbs Free Energy= 0.590574
Sum of electronic and zero-point Energies= -7289.783955
Sum of electronic and thermal Energies= -7289.726681
Sum of electronic and thermal Enthalpies= -7289.725626
Sum of electronic and thermal Free Energies= -7289.885580

```

|                | 1       | 2       | 3       |
|----------------|---------|---------|---------|
| Frequencies -- | 12.9859 | 15.4921 | 24.0675 |
|                | A       | A       | A       |

**(p-MeO)DPPP-Rh-Ph-CO<sub>2</sub>-TS2 (34)**

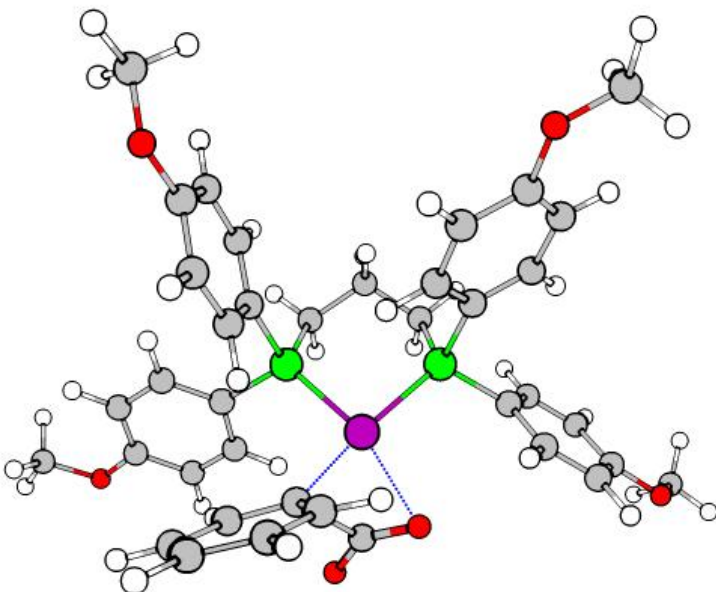

| Center Number | Atomic Number | Atomic Type | Coordinates (Angstroms) |           |           |
|---------------|---------------|-------------|-------------------------|-----------|-----------|
|               |               |             | X                       | Y         | Z         |
| 1             | 45            | 0           | 0.136703                | -0.902088 | 0.596116  |
| 2             | 15            | 0           | -1.400748               | -0.137191 | -0.873404 |
| 3             | 15            | 0           | 1.909065                | -0.250706 | -0.773174 |
| 4             | 6             | 0           | 1.665096                | -0.187659 | -2.597380 |
| 5             | 6             | 0           | -0.891521               | -0.119566 | -2.649188 |
| 6             | 1             | 0           | 1.580296                | -1.216653 | -2.965949 |
| 7             | 1             | 0           | 2.551453                | 0.263557  | -3.058043 |
| 8             | 6             | 0           | 3.424878                | -1.242536 | -0.562003 |
| 9             | 6             | 0           | 4.111372                | -1.849482 | -1.613538 |
| 10            | 6             | 0           | 3.925697                | -1.409359 | 0.740355  |
| 11            | 6             | 0           | 5.271585                | -2.594925 | -1.392233 |
| 12            | 1             | 0           | 3.757933                | -1.753763 | -2.635919 |
| 13            | 6             | 0           | 5.079159                | -2.135916 | 0.973302  |
| 14            | 1             | 0           | 3.399273                | -0.969265 | 1.582519  |
| 15            | 6             | 0           | 5.762742                | -2.737152 | -0.092971 |
| 16            | 1             | 0           | 5.773751                | -3.052217 | -2.238175 |
| 17            | 1             | 0           | 5.463602                | -2.266628 | 1.980834  |
| 18            | 6             | 0           | 2.475231                | 1.452690  | -0.404589 |
| 19            | 6             | 0           | 3.729651                | 1.916559  | -0.808460 |
| 20            | 6             | 0           | 1.632857                | 2.334138  | 0.287972  |
| 21            | 6             | 0           | 4.140224                | 3.221781  | -0.546125 |



|    |   |   |           |           |           |
|----|---|---|-----------|-----------|-----------|
| 22 | 1 | 0 | 4.415688  | 1.247465  | -1.323834 |
| 23 | 6 | 0 | 2.024896  | 3.637704  | 0.553702  |
| 24 | 1 | 0 | 0.658205  | 1.989383  | 0.626986  |
| 25 | 6 | 0 | 3.282260  | 4.091460  | 0.137422  |
| 26 | 1 | 0 | 5.125482  | 3.541640  | -0.868567 |
| 27 | 1 | 0 | 1.372113  | 4.319949  | 1.091071  |
| 28 | 6 | 0 | -2.910372 | -1.158940 | -1.040854 |
| 29 | 6 | 0 | -2.769619 | -2.555395 | -1.082012 |
| 30 | 6 | 0 | -4.185799 | -0.615536 | -1.184103 |
| 31 | 6 | 0 | -3.868291 | -3.375614 | -1.276671 |
| 32 | 1 | 0 | -1.790413 | -3.003791 | -0.924571 |
| 33 | 6 | 0 | -5.303771 | -1.430635 | -1.372306 |
| 34 | 1 | 0 | -4.326654 | 0.461533  | -1.139392 |
| 35 | 6 | 0 | -5.146309 | -2.817870 | -1.424846 |
| 36 | 1 | 0 | -3.762689 | -4.456613 | -1.296613 |
| 37 | 1 | 0 | -6.281367 | -0.970785 | -1.471328 |
| 38 | 6 | 0 | -2.024556 | 1.556735  | -0.562876 |
| 39 | 6 | 0 | -2.293846 | 1.931871  | 0.765393  |
| 40 | 6 | 0 | -2.236642 | 2.507033  | -1.563619 |
| 41 | 6 | 0 | -2.765453 | 3.196893  | 1.071652  |
| 42 | 1 | 0 | -2.126891 | 1.221058  | 1.570726  |
| 43 | 6 | 0 | -2.698918 | 3.791144  | -1.269547 |
| 44 | 1 | 0 | -2.042691 | 2.269146  | -2.605400 |
| 45 | 6 | 0 | -2.968153 | 4.141333  | 0.055674  |
| 46 | 1 | 0 | -2.975636 | 3.479699  | 2.099377  |
| 47 | 1 | 0 | -2.839836 | 4.498651  | -2.079843 |
| 48 | 6 | 0 | -1.203719 | -1.202803 | 2.238820  |
| 49 | 6 | 0 | -2.555633 | -1.572577 | 2.257654  |
| 50 | 6 | 0 | -0.715156 | -0.438673 | 3.312987  |
| 51 | 6 | 0 | -3.406106 | -1.132760 | 3.269545  |
| 52 | 1 | 0 | -2.944558 | -2.226800 | 1.483272  |
| 53 | 6 | 0 | -1.563370 | 0.010919  | 4.326353  |
| 54 | 1 | 0 | 0.345115  | -0.197323 | 3.361388  |
| 55 | 6 | 0 | -2.916104 | -0.327512 | 4.300306  |
| 56 | 1 | 0 | -4.454050 | -1.423978 | 3.258826  |
| 57 | 1 | 0 | -1.165530 | 0.612071  | 5.140955  |
| 58 | 6 | 0 | 0.414208  | 0.598653  | -2.989520 |
| 59 | 1 | 0 | 0.441872  | 0.753181  | -4.074520 |
| 60 | 1 | 0 | 0.441160  | 1.599193  | -2.541519 |
| 61 | 1 | 0 | -1.724690 | 0.284419  | -3.235102 |
| 62 | 1 | 0 | -0.819432 | -1.176591 | -2.932066 |
| 63 | 6 | 0 | 0.039892  | -2.729395 | 1.746819  |
| 64 | 8 | 0 | 1.184364  | -2.280558 | 1.963879  |
| 65 | 8 | 0 | -0.561236 | -3.770650 | 1.675711  |
| 66 | 1 | 0 | -3.580759 | 0.013746  | 5.090362  |
| 67 | 8 | 0 | 3.581472  | 5.378936  | 0.445151  |
| 68 | 8 | 0 | -3.419071 | 5.356022  | 0.455462  |
| 69 | 8 | 0 | -6.161170 | -3.701773 | -1.604319 |
| 70 | 8 | 0 | 6.880665  | -3.432952 | 0.236407  |
| 71 | 6 | 0 | 7.585184  | -4.084367 | -0.805796 |
| 72 | 1 | 0 | 8.426748  | -4.586725 | -0.329356 |
| 73 | 1 | 0 | 6.957084  | -4.829170 | -1.307264 |
| 74 | 1 | 0 | 7.963852  | -3.366509 | -1.542491 |
| 75 | 6 | 0 | 4.850131  | 5.877305  | 0.056480  |
| 76 | 1 | 0 | 4.972970  | 5.853104  | -1.032208 |
| 77 | 1 | 0 | 4.881594  | 6.911656  | 0.398045  |
| 78 | 1 | 0 | 5.662745  | 5.316071  | 0.531058  |
| 79 | 6 | 0 | -3.625541 | 6.346397  | -0.537295 |
| 80 | 1 | 0 | -3.979018 | 7.230729  | -0.007778 |
| 81 | 1 | 0 | -2.693486 | 6.587264  | -1.060658 |
| 82 | 1 | 0 | -4.384786 | 6.032765  | -1.262493 |
| 83 | 6 | 0 | -7.474296 | -3.185361 | -1.732478 |
| 84 | 1 | 0 | -8.124590 | -4.050871 | -1.857598 |

|    |   |   |           |           |           |
|----|---|---|-----------|-----------|-----------|
| 85 | 1 | 0 | -7.776339 | -2.633823 | -0.834998 |
| 86 | 1 | 0 | -7.565421 | -2.536069 | -2.610759 |

```

-----
SCF Done: E(RPBE1PBE) = -7290.45849076      A.U. after 1 cycles
          Conv = 0.7576D-08                  -V/T = 2.0054
Zero-point correction=                      0.691794 (Hartree/Particle)
Thermal correction to Energy=              0.748222
Thermal correction to Enthalpy=           0.749277
Thermal correction to Gibbs Free Energy=   0.591915
Sum of electronic and zero-point Energies= -7289.766697
Sum of electronic and thermal Energies=    -7289.710268
Sum of electronic and thermal Enthalpies=  -7289.709213
Sum of electronic and thermal Free Energies=-7289.866575

          1                2                3
          A                A                A
Frequencies --  -286.7625                12.8214                16.7992
  
```

**(p-MeO)DPPP-Rh-OOCPh-conf2 (35)**

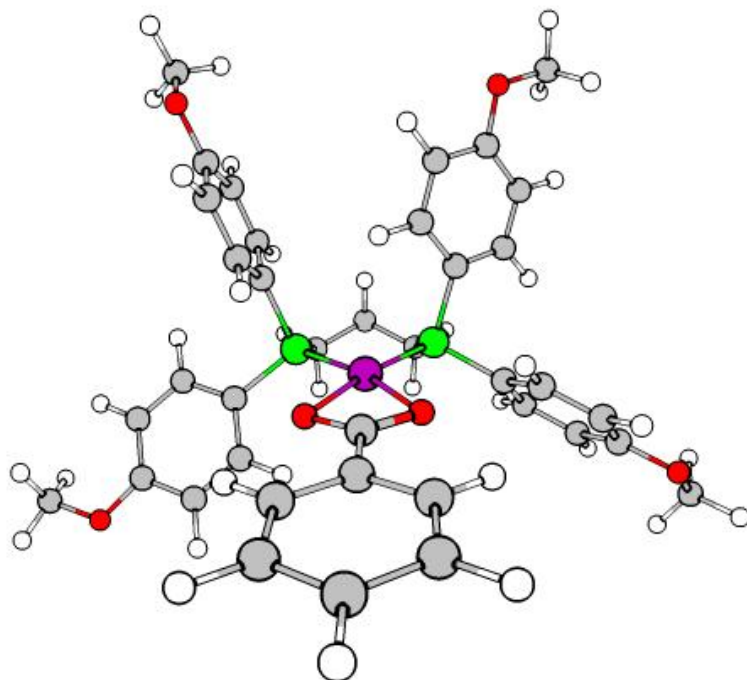

| Center Number | Atomic Number | Atomic Type | Coordinates (Angstroms) |           |           |
|---------------|---------------|-------------|-------------------------|-----------|-----------|
|               |               |             | X                       | Y         | Z         |
| 1             | 45            | 0           | -0.015228               | -0.708770 | -0.023625 |
| 2             | 15            | 0           | -1.526121               | 0.521743  | -1.101779 |
| 3             | 15            | 0           | 1.682665                | 0.329660  | -1.041589 |
| 4             | 6             | 0           | 1.431116                | 1.011780  | -2.736989 |
| 5             | 6             | 0           | -1.121502               | 1.243045  | -2.747592 |
| 6             | 1             | 0           | 1.293589                | 0.169414  | -3.425380 |
| 7             | 1             | 0           | 2.339827                | 1.546430  | -3.036661 |
| 8             | 6             | 0           | 3.167016                | -0.723435 | -1.220525 |
| 9             | 6             | 0           | 3.834288                | -0.935558 | -2.426966 |
| 10            | 6             | 0           | 3.657013                | -1.366927 | -0.070619 |
| 11            | 6             | 0           | 4.963460                | -1.754790 | -2.502680 |
| 12            | 1             | 0           | 3.488302                | -0.464876 | -3.342617 |
| 13            | 6             | 0           | 4.779676                | -2.173451 | -0.129404 |

|    |   |   |           |           |           |
|----|---|---|-----------|-----------|-----------|
| 14 | 1 | 0 | 3.141124  | -1.245774 | 0.877874  |
| 15 | 6 | 0 | 5.442943  | -2.375832 | -1.347941 |
| 16 | 1 | 0 | 5.450146  | -1.894469 | -3.462177 |
| 17 | 1 | 0 | 5.156836  | -2.671915 | 0.759246  |
| 18 | 6 | 0 | 2.332931  | 1.797028  | -0.150646 |
| 19 | 6 | 0 | 3.594953  | 2.328006  | -0.428737 |
| 20 | 6 | 0 | 1.546979  | 2.430416  | 0.822424  |
| 21 | 6 | 0 | 4.067654  | 3.463648  | 0.226393  |
| 22 | 1 | 0 | 4.239984  | 1.843681  | -1.159287 |
| 23 | 6 | 0 | 2.000889  | 3.564357  | 1.480031  |
| 24 | 1 | 0 | 0.569850  | 2.019998  | 1.067706  |
| 25 | 6 | 0 | 3.264626  | 4.089917  | 1.186253  |
| 26 | 1 | 0 | 5.057020  | 3.839818  | -0.011852 |
| 27 | 1 | 0 | 1.392525  | 4.053849  | 2.235500  |
| 28 | 6 | 0 | -3.056862 | -0.407455 | -1.481725 |
| 29 | 6 | 0 | -2.988882 | -1.795349 | -1.672454 |
| 30 | 6 | 0 | -4.292710 | 0.223498  | -1.633072 |
| 31 | 6 | 0 | -4.116474 | -2.521289 | -2.022767 |
| 32 | 1 | 0 | -2.041035 | -2.308536 | -1.527378 |
| 33 | 6 | 0 | -5.436510 | -0.493990 | -1.981336 |
| 34 | 1 | 0 | -4.380615 | 1.294760  | -1.466022 |
| 35 | 6 | 0 | -5.349055 | -1.875246 | -2.181625 |
| 36 | 1 | 0 | -4.068498 | -3.597351 | -2.164806 |
| 37 | 1 | 0 | -6.380160 | 0.031478  | -2.083348 |
| 38 | 6 | 0 | -2.130628 | 1.931233  | -0.102219 |
| 39 | 6 | 0 | -2.468430 | 1.664085  | 1.237318  |
| 40 | 6 | 0 | -2.251532 | 3.242600  | -0.559389 |
| 41 | 6 | 0 | -2.922014 | 2.668274  | 2.073864  |
| 42 | 1 | 0 | -2.366708 | 0.651702  | 1.623314  |
| 43 | 6 | 0 | -2.695912 | 4.270542  | 0.277133  |
| 44 | 1 | 0 | -1.995328 | 3.498699  | -1.583867 |
| 45 | 6 | 0 | -3.036818 | 3.984061  | 1.599993  |
| 46 | 1 | 0 | -3.186245 | 2.460103  | 3.106957  |
| 47 | 1 | 0 | -2.767098 | 5.278365  | -0.117812 |
| 48 | 6 | 0 | 0.229893  | 1.954560  | -2.830973 |
| 49 | 1 | 0 | 0.281201  | 2.472116  | -3.796194 |
| 50 | 1 | 0 | 0.308500  | 2.734864  | -2.064435 |
| 51 | 1 | 0 | -1.935199 | 1.907997  | -3.059487 |
| 52 | 1 | 0 | -1.138903 | 0.395427  | -3.443046 |
| 53 | 6 | 0 | -0.261817 | -2.516123 | 1.733953  |
| 54 | 8 | 0 | 0.903797  | -2.166326 | 1.368378  |
| 55 | 8 | 0 | -1.291118 | -1.964846 | 1.225887  |
| 56 | 6 | 0 | -0.430166 | -3.580021 | 2.762688  |
| 57 | 6 | 0 | -1.711317 | -3.964660 | 3.169131  |
| 58 | 6 | 0 | 0.691577  | -4.197411 | 3.323440  |
| 59 | 6 | 0 | -1.868621 | -4.958391 | 4.131577  |
| 60 | 1 | 0 | -2.571300 | -3.476460 | 2.720378  |
| 61 | 6 | 0 | 0.532957  | -5.191205 | 4.285546  |
| 62 | 1 | 0 | 1.678945  | -3.888471 | 2.993438  |
| 63 | 6 | 0 | -0.747058 | -5.572447 | 4.691096  |
| 64 | 1 | 0 | -2.865360 | -5.256289 | 4.446692  |
| 65 | 1 | 0 | 1.406153  | -5.670536 | 4.720575  |
| 66 | 1 | 0 | -0.870494 | -6.348411 | 5.442441  |
| 67 | 8 | 0 | 3.624576  | 5.198520  | 1.883590  |
| 68 | 8 | 0 | -3.481508 | 4.899996  | 2.497810  |
| 69 | 8 | 0 | 6.530765  | -3.188181 | -1.304171 |
| 70 | 8 | 0 | -6.396908 | -2.669813 | -2.521583 |
| 71 | 6 | 0 | 7.213904  | -3.443662 | -2.518215 |
| 72 | 1 | 0 | 8.034497  | -4.114508 | -2.264511 |
| 73 | 1 | 0 | 6.560628  | -3.933559 | -3.249186 |
| 74 | 1 | 0 | 7.622054  | -2.522541 | -2.949857 |
| 75 | 6 | 0 | 4.907636  | 5.747872  | 1.640055  |
| 76 | 1 | 0 | 5.012224  | 6.075967  | 0.599512  |

|    |   |   |           |           |           |
|----|---|---|-----------|-----------|-----------|
| 77 | 1 | 0 | 4.992634  | 6.612135  | 2.298512  |
| 78 | 1 | 0 | 5.701357  | 5.031780  | 1.880810  |
| 79 | 6 | 0 | -3.605651 | 6.243851  | 2.066582  |
| 80 | 1 | 0 | -4.327519 | 6.335603  | 1.247007  |
| 81 | 1 | 0 | -3.969354 | 6.802085  | 2.928941  |
| 82 | 1 | 0 | -2.639182 | 6.654266  | 1.752770  |
| 83 | 6 | 0 | -7.666245 | -2.060858 | -2.679004 |
| 84 | 1 | 0 | -8.352382 | -2.864500 | -2.945663 |
| 85 | 1 | 0 | -8.004000 | -1.592807 | -1.747502 |
| 86 | 1 | 0 | -7.655589 | -1.314755 | -3.481809 |

-----

SCF Done: E(RPBE1PBE) = -7290.51568515 A.U. after 1 cycles  
 Convrg = 0.2873D-08 -V/T = 2.0053

Zero-point correction= 0.694696 (Hartree/Particle)  
 Thermal correction to Energy= 0.751181  
 Thermal correction to Enthalpy= 0.752237  
 Thermal correction to Gibbs Free Energy= 0.591654  
 Sum of electronic and zero-point Energies= -7289.820989  
 Sum of electronic and thermal Energies= -7289.764504  
 Sum of electronic and thermal Enthalpies= -7289.763449  
 Sum of electronic and thermal Free Energies= -7289.924031

|                | 1      | 2       | 3       |
|----------------|--------|---------|---------|
|                | A      | A       | A       |
| Frequencies -- | 9.0405 | 14.8139 | 16.2014 |

### COD-Rh catalyst

#### **COD-Rh-Ph (36)**

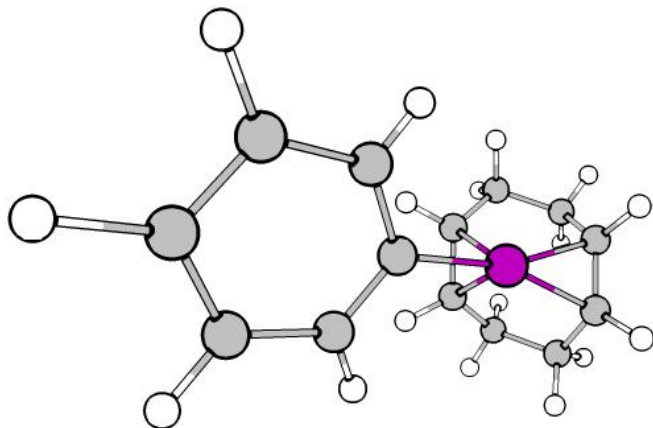

-----

| Center Number | Atomic Number | Atomic Type | Coordinates (Angstroms) |           |           |
|---------------|---------------|-------------|-------------------------|-----------|-----------|
|               |               |             | X                       | Y         | Z         |
| 1             | 45            | 0           | 0.229064                | -0.053563 | -0.562665 |
| 2             | 6             | 0           | 0.872052                | 0.778126  | 1.249558  |
| 3             | 1             | 0           | 0.063346                | 1.374726  | 1.672592  |
| 4             | 6             | 0           | 2.209869                | 1.495209  | 1.130151  |
| 5             | 1             | 0           | 2.127843                | 2.480992  | 1.599302  |
| 6             | 1             | 0           | 2.967665                | 0.956516  | 1.707924  |
| 7             | 6             | 0           | 2.670879                | 1.686849  | -0.326231 |
| 8             | 1             | 0           | 2.230606                | 2.611442  | -0.713839 |
| 9             | 1             | 0           | 3.760506                | 1.833151  | -0.360517 |
| 10            | 6             | 0           | 2.259167                | 0.570534  | -1.258973 |
| 11            | 1             | 0           | 2.095809                | 0.865758  | -2.297757 |
| 12            | 6             | 0           | 2.338710                | -0.781521 | -0.991648 |
| 13            | 1             | 0           | 2.207447                | -1.466355 | -1.830754 |
| 14            | 6             | 0           | 2.921078                | -1.369120 | 0.276400  |

-----

|    |   |   |           |           |           |
|----|---|---|-----------|-----------|-----------|
| 15 | 1 | 0 | 3.425488  | -2.310534 | 0.034668  |
| 16 | 1 | 0 | 3.699798  | -0.705465 | 0.661818  |
| 17 | 6 | 0 | 1.858998  | -1.637549 | 1.357891  |
| 18 | 1 | 0 | 1.411156  | -2.621994 | 1.182140  |
| 19 | 1 | 0 | 2.337767  | -1.697248 | 2.347419  |
| 20 | 6 | 0 | 0.732473  | -0.631196 | 1.382263  |
| 21 | 1 | 0 | -0.160456 | -0.979502 | 1.902634  |
| 22 | 6 | 0 | -1.728190 | 0.012117  | -0.078823 |
| 23 | 6 | 0 | -2.417366 | 1.198773  | 0.226346  |
| 24 | 6 | 0 | -2.497624 | -1.156426 | -0.229246 |
| 25 | 6 | 0 | -3.809852 | 1.225268  | 0.342413  |
| 26 | 1 | 0 | -1.865196 | 2.127241  | 0.367034  |
| 27 | 6 | 0 | -3.889182 | -1.137719 | -0.110866 |
| 28 | 1 | 0 | -2.007327 | -2.107115 | -0.442492 |
| 29 | 6 | 0 | -4.552273 | 0.056540  | 0.174398  |
| 30 | 1 | 0 | -4.316352 | 2.161693  | 0.568713  |
| 31 | 1 | 0 | -4.456592 | -2.058107 | -0.235500 |
| 32 | 1 | 0 | -5.635151 | 0.074255  | 0.270908  |

-----

SCF Done: E(RPBE1PBE) = -5230.34248824 A.U. after 1 cycles  
 Conv g = 0.6266D-08 -V/T = 2.0033

Zero-point correction= 0.273993 (Hartree/Particle)  
 Thermal correction to Energy= 0.290944  
 Thermal correction to Enthalpy= 0.292000  
 Thermal correction to Gibbs Free Energy= 0.225735  
 Sum of electronic and zero-point Energies= -5230.068495  
 Sum of electronic and thermal Energies= -5230.051544  
 Sum of electronic and thermal Enthalpies= -5230.050489  
 Sum of electronic and thermal Free Energies= -5230.116753

|                | 1       | 2       | 3       |
|----------------|---------|---------|---------|
|                | A       | A       | A       |
| Frequencies -- | 25.0591 | 52.5227 | 60.8183 |

### COD-Rh-Ph-O=C=O (37)

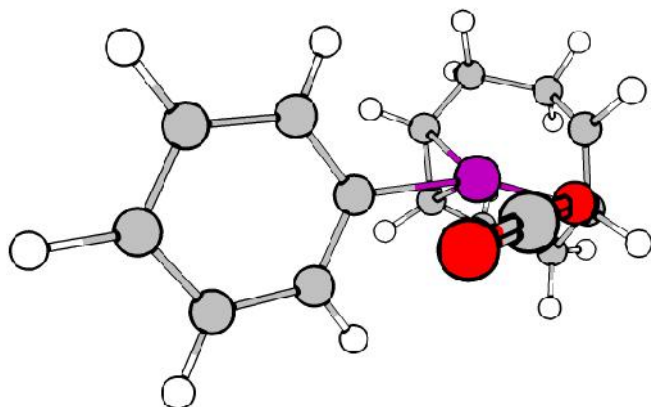

-----

| Center Number | Atomic Number | Atomic Type | Coordinates (Angstroms) |           |          |
|---------------|---------------|-------------|-------------------------|-----------|----------|
|               |               |             | X                       | Y         | Z        |
| 1             | 6             | 0           | 1.454197                | -1.172030 | 1.630279 |
| 2             | 6             | 0           | 1.853135                | -0.195891 | 2.562593 |
| 3             | 6             | 0           | 2.000080                | -2.459742 | 1.786364 |
| 4             | 6             | 0           | 2.733972                | -0.491982 | 3.606328 |
| 5             | 1             | 0           | 1.471839                | 0.821713  | 2.477367 |
| 6             | 6             | 0           | 2.882486                | -2.763066 | 2.826684 |
| 7             | 1             | 0           | 1.736023                | -3.248591 | 1.081891 |
| 8             | 6             | 0           | 3.252371                | -1.779620 | 3.744078 |

-----

|    |    |   |           |           |           |
|----|----|---|-----------|-----------|-----------|
| 9  | 1  | 0 | 3.018108  | 0.286353  | 4.312178  |
| 10 | 1  | 0 | 3.283834  | -3.770562 | 2.919696  |
| 11 | 1  | 0 | 3.939353  | -2.012866 | 4.553908  |
| 12 | 6  | 0 | -1.226451 | -1.925916 | 3.091731  |
| 13 | 8  | 0 | -0.925537 | -2.327180 | 4.138711  |
| 14 | 8  | 0 | -1.571290 | -1.526590 | 2.042504  |
| 15 | 45 | 0 | -0.006713 | -0.773214 | 0.276538  |
| 16 | 6  | 0 | -1.497084 | -0.888284 | -1.441416 |
| 17 | 1  | 0 | -2.177268 | -1.681891 | -1.130410 |
| 18 | 6  | 0 | -0.742599 | -1.113121 | -2.734135 |
| 19 | 1  | 0 | -1.258281 | -1.881436 | -3.319819 |
| 20 | 1  | 0 | -0.777126 | -0.204215 | -3.340438 |
| 21 | 6  | 0 | 0.713584  | -1.554338 | -2.508209 |
| 22 | 1  | 0 | 0.738668  | -2.640255 | -2.364115 |
| 23 | 1  | 0 | 1.311488  | -1.355968 | -3.411008 |
| 24 | 6  | 0 | 1.368466  | -0.926433 | -1.300192 |
| 25 | 1  | 0 | 2.251107  | -1.460268 | -0.945961 |
| 26 | 6  | 0 | 1.254524  | 0.429028  | -0.902283 |
| 27 | 1  | 0 | 2.054036  | 0.806046  | -0.264303 |
| 28 | 6  | 0 | 0.493603  | 1.490705  | -1.683751 |
| 29 | 1  | 0 | 0.989081  | 2.457047  | -1.544715 |
| 30 | 1  | 0 | 0.559979  | 1.276487  | -2.755158 |
| 31 | 6  | 0 | -0.976134 | 1.629626  | -1.248151 |
| 32 | 1  | 0 | -1.026038 | 2.318452  | -0.398348 |
| 33 | 1  | 0 | -1.565223 | 2.097507  | -2.050855 |
| 34 | 6  | 0 | -1.617173 | 0.332861  | -0.810161 |
| 35 | 1  | 0 | -2.402557 | 0.430612  | -0.058451 |

-----

SCF Done: E(RPBE1PBE) = -5418.76103336 A.U. after 1 cycles  
 Conv = 0.2806D-08 -V/T = 2.0036  
 Zero-point correction= 0.286658 (Hartree/Particle)  
 Thermal correction to Energy= 0.308515  
 Thermal correction to Enthalpy= 0.309570  
 Thermal correction to Gibbs Free Energy= 0.229392  
 Sum of electronic and zero-point Energies= -5418.474376  
 Sum of electronic and thermal Energies= -5418.452518  
 Sum of electronic and thermal Enthalpies= -5418.451463  
 Sum of electronic and thermal Free Energies= -5418.531641

|                | 1       | 2       | 3       |
|----------------|---------|---------|---------|
|                | A       | A       | A       |
| Frequencies -- | 16.7076 | 32.1512 | 41.9985 |

### COD-Rh-Ph-O=C=O-TS1 (38)

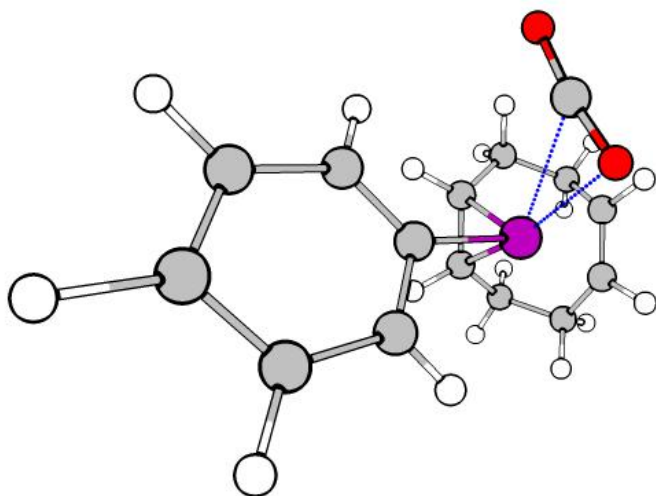

| Center<br>Number | Atomic<br>Number | Atomic<br>Type | Coordinates (Angstroms) |           |           |
|------------------|------------------|----------------|-------------------------|-----------|-----------|
|                  |                  |                | X                       | Y         | Z         |
| 1                | 6                | 0              | 1.665727                | -0.316956 | 0.062254  |
| 2                | 6                | 0              | 2.336404                | -1.191629 | -0.811811 |
| 3                | 6                | 0              | 2.431247                | 0.302485  | 1.061901  |
| 4                | 6                | 0              | 3.705963                | -1.435675 | -0.696795 |
| 5                | 1                | 0              | 1.785045                | -1.701447 | -1.604086 |
| 6                | 6                | 0              | 3.805039                | 0.068716  | 1.178261  |
| 7                | 1                | 0              | 1.963612                | 0.995119  | 1.759947  |
| 8                | 6                | 0              | 4.448111                | -0.803607 | 0.302186  |
| 9                | 1                | 0              | 4.194352                | -2.121037 | -1.386747 |
| 10               | 1                | 0              | 4.373254                | 0.572392  | 1.957868  |
| 11               | 1                | 0              | 5.515222                | -0.989905 | 0.395243  |
| 12               | 6                | 0              | 0.485579                | 2.429457  | -0.668011 |
| 13               | 8                | 0              | 0.601142                | 3.127369  | 0.262262  |
| 14               | 8                | 0              | 0.410034                | 1.892097  | -1.719701 |
| 15               | 45               | 0              | -0.289356               | -0.030794 | -0.394791 |
| 16               | 6                | 0              | -2.471671               | 0.702703  | -0.590852 |
| 17               | 1                | 0              | -2.378159               | 1.639095  | -1.141102 |
| 18               | 6                | 0              | -3.080509               | 0.788768  | 0.791471  |
| 19               | 1                | 0              | -3.637654               | 1.727594  | 0.874941  |
| 20               | 1                | 0              | -3.818879               | -0.007514 | 0.915728  |
| 21               | 6                | 0              | -2.031649               | 0.734131  | 1.915648  |
| 22               | 1                | 0              | -1.632218               | 1.740550  | 2.081498  |
| 23               | 1                | 0              | -2.511335               | 0.439473  | 2.861357  |
| 24               | 6                | 0              | -0.859514               | -0.171997 | 1.626982  |
| 25               | 1                | 0              | 0.012019                | 0.022662  | 2.251275  |
| 26               | 6                | 0              | -0.921564               | -1.452725 | 1.024363  |
| 27               | 1                | 0              | -0.082115               | -2.116250 | 1.231889  |
| 28               | 6                | 0              | -2.213401               | -2.148617 | 0.617570  |
| 29               | 1                | 0              | -2.082409               | -3.229670 | 0.728962  |
| 30               | 1                | 0              | -3.013135               | -1.875286 | 1.312588  |
| 31               | 6                | 0              | -2.631403               | -1.858151 | -0.834156 |
| 32               | 1                | 0              | -2.109141               | -2.556498 | -1.496454 |
| 33               | 1                | 0              | -3.703805               | -2.063285 | -0.966771 |
| 34               | 6                | 0              | -2.306396               | -0.460924 | -1.307838 |
| 35               | 1                | 0              | -2.114833               | -0.361870 | -2.378071 |

```

SCF Done: E(RPBE1PBE) = -5418.75781384 A.U. after 1 cycles
          Conv = 0.2253D-08 -V/T = 2.0036
Zero-point correction= 0.286368 (Hartree/Particle)
Thermal correction to Energy= 0.307179
Thermal correction to Enthalpy= 0.308234
Thermal correction to Gibbs Free Energy= 0.232176
Sum of electronic and zero-point Energies= -5418.471446
Sum of electronic and thermal Energies= -5418.450635
Sum of electronic and thermal Enthalpies= -5418.449580
Sum of electronic and thermal Free Energies= -5418.525637

          1          2          3
          A          A          A
Frequencies --  -78.4589      26.4537      32.5867

```

**COD-Rh-Ph-CO<sub>2</sub> (39)**

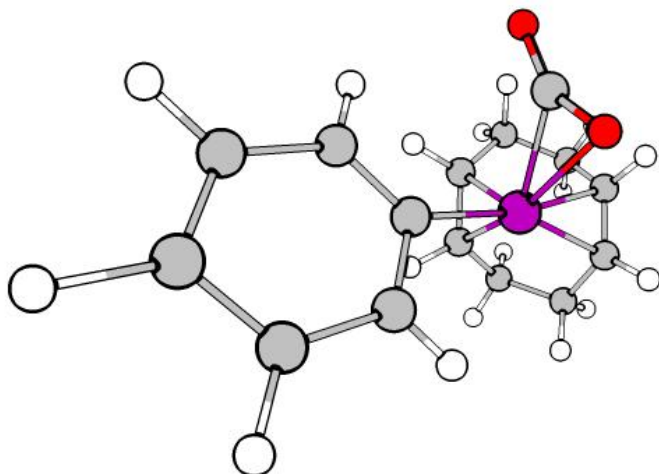

| Center Number | Atomic Number | Atomic Type | Coordinates (Angstroms) |           |           |
|---------------|---------------|-------------|-------------------------|-----------|-----------|
|               |               |             | X                       | Y         | Z         |
| 1             | 6             | 0           | 1.720499                | -0.165557 | 0.032122  |
| 2             | 6             | 0           | 2.376016                | -1.161257 | -0.707303 |
| 3             | 6             | 0           | 2.475858                | 0.597024  | 0.929752  |
| 4             | 6             | 0           | 3.744540                | -1.390800 | -0.554817 |
| 5             | 1             | 0           | 1.822518                | -1.775897 | -1.419463 |
| 6             | 6             | 0           | 3.847332                | 0.372819  | 1.080685  |
| 7             | 1             | 0           | 2.007917                | 1.392661  | 1.505973  |
| 8             | 6             | 0           | 4.485953                | -0.622182 | 0.343089  |
| 9             | 1             | 0           | 4.231067                | -2.169091 | -1.138871 |
| 10            | 1             | 0           | 4.418268                | 0.984896  | 1.775661  |
| 11            | 1             | 0           | 5.552473                | -0.795366 | 0.462197  |
| 12            | 6             | 0           | 0.106375                | 2.046264  | -0.666903 |
| 13            | 8             | 0           | 0.101657                | 2.914062  | 0.153011  |
| 14            | 8             | 0           | 0.233158                | 1.697726  | -1.833250 |
| 15            | 45            | 0           | -0.237846               | -0.023436 | -0.433027 |
| 16            | 6             | 0           | -2.568528               | 0.471724  | -0.687700 |
| 17            | 1             | 0           | -2.543171               | 1.337858  | -1.347810 |
| 18            | 6             | 0           | -3.144469               | 0.684552  | 0.691880  |
| 19            | 1             | 0           | -3.799652               | 1.560795  | 0.663044  |
| 20            | 1             | 0           | -3.784755               | -0.159994 | 0.956125  |
| 21            | 6             | 0           | -2.073579               | 0.915755  | 1.770497  |
| 22            | 1             | 0           | -1.761288               | 1.963352  | 1.748218  |
| 23            | 1             | 0           | -2.507461               | 0.746028  | 2.766950  |
| 24            | 6             | 0           | -0.830764               | 0.074726  | 1.623157  |
| 25            | 1             | 0           | 0.026542                | 0.448759  | 2.180381  |
| 26            | 6             | 0           | -0.773914               | -1.269428 | 1.216193  |
| 27            | 1             | 0           | 0.130559                | -1.811071 | 1.492344  |
| 28            | 6             | 0           | -1.981967               | -2.136352 | 0.892539  |
| 29            | 1             | 0           | -1.738840               | -3.173619 | 1.142534  |
| 30            | 1             | 0           | -2.815413               | -1.863964 | 1.545493  |
| 31            | 6             | 0           | -2.411334               | -2.092828 | -0.586248 |
| 32            | 1             | 0           | -1.791783               | -2.796128 | -1.152846 |
| 33            | 1             | 0           | -3.442230               | -2.461651 | -0.684924 |
| 34            | 6             | 0           | -2.286666               | -0.742274 | -1.250748 |
| 35            | 1             | 0           | -2.092296               | -0.760381 | -2.324039 |

SCF Done: E(RPBE1PBE) = -5418.76136893 A.U. after 1 cycles  
 Convrg = 0.3942D-08 -V/T = 2.0036  
 Zero-point correction= 0.287424 (Hartree/Particle)



Thermal correction to Energy= 0.308399  
 Thermal correction to Enthalpy= 0.309454  
 Thermal correction to Gibbs Free Energy= 0.234985  
 Sum of electronic and zero-point Energies= -5418.473944  
 Sum of electronic and thermal Energies= -5418.452970  
 Sum of electronic and thermal Enthalpies= -5418.451915  
 Sum of electronic and thermal Free Energies= -5418.526384

|                |         |         |         |
|----------------|---------|---------|---------|
|                | 1       | 2       | 3       |
|                | A       | A       | A       |
| Frequencies -- | 47.5944 | 54.9086 | 65.6464 |

### COD-Rh-Ph-CO<sub>2</sub>-TS2 (40)

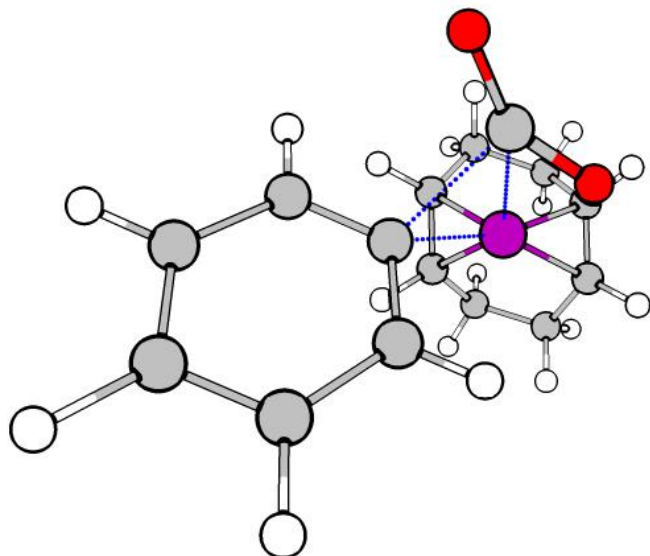

| Center Number | Atomic Number | Atomic Type | Coordinates (Angstroms) |           |           |
|---------------|---------------|-------------|-------------------------|-----------|-----------|
|               |               |             | X                       | Y         | Z         |
| 1             | 6             | 0           | 1.699705                | 0.050492  | 0.053780  |
| 2             | 6             | 0           | 2.305634                | -0.395505 | -1.131539 |
| 3             | 6             | 0           | 2.368890                | -0.175053 | 1.267022  |
| 4             | 6             | 0           | 3.508305                | -1.106208 | -1.103888 |
| 5             | 1             | 0           | 1.841886                | -0.178412 | -2.093198 |
| 6             | 6             | 0           | 3.570058                | -0.873886 | 1.299335  |
| 7             | 1             | 0           | 1.962886                | 0.225376  | 2.193138  |
| 8             | 6             | 0           | 4.137868                | -1.351412 | 0.113345  |
| 9             | 1             | 0           | 3.957412                | -1.451644 | -2.031959 |
| 10            | 1             | 0           | 4.075087                | -1.041640 | 2.247663  |
| 11            | 1             | 0           | 5.079113                | -1.894506 | 0.141298  |
| 12            | 6             | 0           | 1.065753                | 2.023015  | -0.196434 |
| 13            | 8             | 0           | 1.572388                | 2.701174  | 0.644491  |
| 14            | 8             | 0           | 0.478406                | 2.026141  | -1.282409 |
| 15            | 45            | 0           | -0.367187               | 0.243956  | -0.318284 |
| 16            | 6             | 0           | -2.530453               | 0.835862  | -0.413944 |
| 17            | 1             | 0           | -2.469858               | 1.883698  | -0.705801 |
| 18            | 6             | 0           | -3.223544               | 0.539404  | 0.897589  |
| 19            | 1             | 0           | -3.845345               | 1.397237  | 1.172194  |
| 20            | 1             | 0           | -3.909310               | -0.302074 | 0.770020  |
| 21            | 6             | 0           | -2.226780               | 0.262323  | 2.032254  |
| 22            | 1             | 0           | -1.902500               | 1.214862  | 2.463364  |
| 23            | 1             | 0           | -2.717591               | -0.290923 | 2.846903  |
| 24            | 6             | 0           | -0.986904               | -0.473675 | 1.585278  |
| 25            | 1             | 0           | -0.140713               | -0.364362 | 2.261574  |

|    |   |   |           |           |           |
|----|---|---|-----------|-----------|-----------|
| 26 | 6 | 0 | -0.935966 | -1.553698 | 0.685229  |
| 27 | 1 | 0 | -0.041019 | -2.173647 | 0.729353  |
| 28 | 6 | 0 | -2.156356 | -2.209377 | 0.058805  |
| 29 | 1 | 0 | -1.948198 | -3.273568 | -0.088529 |
| 30 | 1 | 0 | -2.996434 | -2.165577 | 0.758061  |
| 31 | 6 | 0 | -2.540251 | -1.591103 | -1.296041 |
| 32 | 1 | 0 | -1.961652 | -2.082314 | -2.084783 |
| 33 | 1 | 0 | -3.596437 | -1.794360 | -1.524628 |
| 34 | 6 | 0 | -2.260543 | -0.109181 | -1.390129 |
| 35 | 1 | 0 | -2.042753 | 0.263332  | -2.392542 |

-----

SCF Done: E(RPBE1PBE) = -5418.74826557 A.U. after 1 cycles  
 Convrg = 0.4225D-08 -V/T = 2.0036

Zero-point correction= 0.286602 (Hartree/Particle)  
 Thermal correction to Energy= 0.306866  
 Thermal correction to Enthalpy= 0.307921  
 Thermal correction to Gibbs Free Energy= 0.234714  
 Sum of electronic and zero-point Energies= -5418.461664  
 Sum of electronic and thermal Energies= -5418.441399  
 Sum of electronic and thermal Enthalpies= -5418.440344  
 Sum of electronic and thermal Free Energies= -5418.513552

|                | 1         | 2       | 3       |
|----------------|-----------|---------|---------|
|                | A         | A       | A       |
| Frequencies -- | -280.7656 | 37.8432 | 49.2498 |

### COD-Rh-OOCPh-conf1 (41)

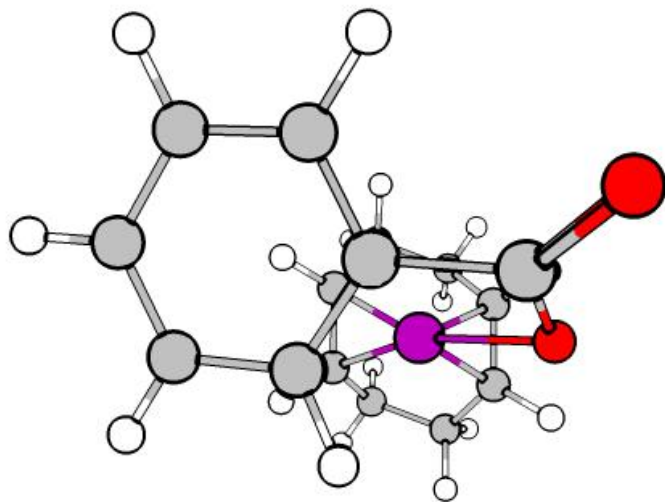

-----

| Center Number | Atomic Number | Atomic Type | Coordinates (Angstroms) |           |           |
|---------------|---------------|-------------|-------------------------|-----------|-----------|
|               |               |             | X                       | Y         | Z         |
| 1             | 6             | 0           | 2.146013                | 0.403444  | -0.061689 |
| 2             | 6             | 0           | 1.813089                | -0.330165 | -1.221030 |
| 3             | 6             | 0           | 2.783577                | -0.255735 | 1.006261  |
| 4             | 6             | 0           | 2.140982                | -1.695667 | -1.308919 |
| 5             | 1             | 0           | 1.440864                | 0.190217  | -2.104176 |
| 6             | 6             | 0           | 3.071544                | -1.607996 | 0.919117  |
| 7             | 1             | 0           | 3.057410                | 0.318037  | 1.887003  |
| 8             | 6             | 0           | 2.753549                | -2.332379 | -0.241754 |
| 9             | 1             | 0           | 1.920014                | -2.242012 | -2.221948 |
| 10            | 1             | 0           | 3.559432                | -2.110477 | 1.750167  |
| 11            | 1             | 0           | 3.002613                | -3.387971 | -0.306492 |
| 12            | 6             | 0           | 1.866651                | 1.894658  | 0.005880  |

-----

|    |    |   |           |           |           |
|----|----|---|-----------|-----------|-----------|
| 13 | 8  | 0 | 2.729116  | 2.681307  | 0.375447  |
| 14 | 8  | 0 | 0.645455  | 2.179975  | -0.337780 |
| 15 | 45 | 0 | -0.282351 | 0.322561  | -0.218829 |
| 16 | 6  | 0 | -1.941967 | 1.066951  | 0.928743  |
| 17 | 1  | 0 | -1.529172 | 1.941884  | 1.430133  |
| 18 | 6  | 0 | -2.551138 | 0.004395  | 1.822715  |
| 19 | 1  | 0 | -2.705951 | 0.425606  | 2.820664  |
| 20 | 1  | 0 | -3.543804 | -0.265269 | 1.451781  |
| 21 | 6  | 0 | -1.649839 | -1.234505 | 1.934900  |
| 22 | 1  | 0 | -0.915389 | -1.067048 | 2.729032  |
| 23 | 1  | 0 | -2.235177 | -2.114556 | 2.238605  |
| 24 | 6  | 0 | -0.880777 | -1.527573 | 0.666999  |
| 25 | 1  | 0 | 0.046524  | -2.085041 | 0.811898  |
| 26 | 6  | 0 | -1.393748 | -1.489957 | -0.633862 |
| 27 | 1  | 0 | -0.822437 | -2.014407 | -1.398922 |
| 28 | 6  | 0 | -2.844367 | -1.199663 | -0.979193 |
| 29 | 1  | 0 | -3.122323 | -1.781463 | -1.863504 |
| 30 | 1  | 0 | -3.491269 | -1.555927 | -0.172757 |
| 31 | 6  | 0 | -3.090482 | 0.290228  | -1.261973 |
| 32 | 1  | 0 | -2.880331 | 0.494382  | -2.316515 |
| 33 | 1  | 0 | -4.149217 | 0.544623  | -1.107488 |
| 34 | 6  | 0 | -2.209384 | 1.201731  | -0.442413 |
| 35 | 1  | 0 | -2.004779 | 2.177330  | -0.884211 |

```

-----
SCF Done: E(RPBE1PBE) = -5418.79574295 A.U. after 1 cycles
          Convrg = 0.3083D-08 -V/T = 2.0036
SCF Done: E(RPBE1PBE) = -5418.79574295 A.U. after 1 cycles
          Convrg = 0.3083D-08 -V/T = 2.0036
Zero-point correction= 0.289667 (Hartree/Particle)
Thermal correction to Energy= 0.309674
Thermal correction to Enthalpy= 0.310729
Thermal correction to Gibbs Free Energy= 0.237899
Sum of electronic and zero-point Energies= -5418.506076
Sum of electronic and thermal Energies= -5418.486069
Sum of electronic and thermal Enthalpies= -5418.485014
Sum of electronic and thermal Free Energies= -5418.557844

          1          2          3
          A          A          A
Frequencies -- 29.9077 45.2967 54.9781

```

### COD-Rh-OOCPh-conf1 (42)

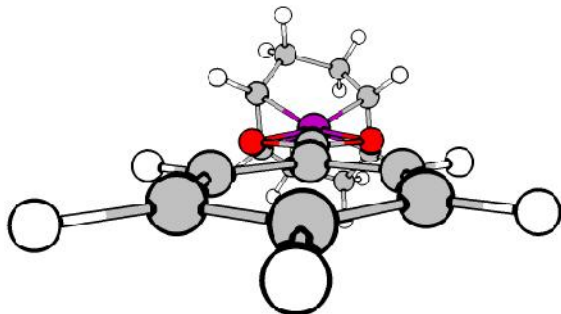

| Center Number | Atomic Number | Atomic Type | Coordinates (Angstroms) |           |           |
|---------------|---------------|-------------|-------------------------|-----------|-----------|
|               |               |             | X                       | Y         | Z         |
| 1             | 6             | 0           | 3.109875                | 0.000091  | -0.000395 |
| 2             | 6             | 0           | 3.808665                | -1.190208 | -0.223451 |
| 3             | 6             | 0           | 3.808465                | 1.190399  | 0.223262  |
| 4             | 6             | 0           | 5.200381                | -1.188830 | -0.222470 |

|    |    |   |           |           |           |
|----|----|---|-----------|-----------|-----------|
| 5  | 1  | 0 | 3.248811  | -2.104708 | -0.394998 |
| 6  | 6  | 0 | 5.200179  | 1.189020  | 0.223455  |
| 7  | 1  | 0 | 3.248461  | 2.104887  | 0.394343  |
| 8  | 6  | 0 | 5.896626  | 0.000090  | 0.000804  |
| 9  | 1  | 0 | 5.744607  | -2.113396 | -0.395460 |
| 10 | 1  | 0 | 5.744266  | 2.113581  | 0.396907  |
| 11 | 1  | 0 | 6.983589  | 0.000093  | 0.001285  |
| 12 | 6  | 0 | 1.625852  | 0.000085  | -0.000924 |
| 13 | 8  | 0 | 0.987209  | 1.084892  | 0.208302  |
| 14 | 8  | 0 | 0.987428  | -1.084790 | -0.210495 |
| 15 | 45 | 0 | -0.878563 | -0.000114 | -0.000672 |
| 16 | 6  | 0 | -2.387962 | -1.212839 | -0.898342 |
| 17 | 1  | 0 | -1.848555 | -1.843097 | -1.605838 |
| 18 | 6  | 0 | -3.533514 | -0.401204 | -1.477969 |
| 19 | 1  | 0 | -3.768621 | -0.778332 | -2.478058 |
| 20 | 1  | 0 | -4.436461 | -0.553662 | -0.880040 |
| 21 | 6  | 0 | -3.180115 | 1.090528  | -1.569524 |
| 22 | 1  | 0 | -2.664925 | 1.277041  | -2.517147 |
| 23 | 1  | 0 | -4.089698 | 1.708394  | -1.587731 |
| 24 | 6  | 0 | -2.256638 | 1.538556  | -0.460799 |
| 25 | 1  | 0 | -1.635699 | 2.403281  | -0.700441 |
| 26 | 6  | 0 | -2.386678 | 1.212720  | 0.899156  |
| 27 | 1  | 0 | -1.845895 | 1.842283  | 1.606206  |
| 28 | 6  | 0 | -3.531727 | 0.401098  | 1.479679  |
| 29 | 1  | 0 | -3.766982 | 0.778781  | 2.479536  |
| 30 | 1  | 0 | -4.434789 | 0.552490  | 0.881694  |
| 31 | 6  | 0 | -3.177191 | -1.090211 | 1.571992  |
| 32 | 1  | 0 | -2.659379 | -1.275237 | 2.518500  |
| 33 | 1  | 0 | -4.086224 | -1.708794 | 1.593226  |
| 34 | 6  | 0 | -2.256077 | -1.538576 | 0.461486  |
| 35 | 1  | 0 | -1.635118 | -2.403592 | 0.700046  |

-----

SCF Done: E(RPBE1PBE) = -5418.80923241 A.U. after 1 cycles  
 Conv = 0.1770D-08 -V/T = 2.0035

Zero-point correction= 0.289985 (Hartree/Particle)  
 Thermal correction to Energy= 0.309955  
 Thermal correction to Enthalpy= 0.311010  
 Thermal correction to Gibbs Free Energy= 0.236488  
 Sum of electronic and zero-point Energies= -5418.519247  
 Sum of electronic and thermal Energies= -5418.499278  
 Sum of electronic and thermal Enthalpies= -5418.498223  
 Sum of electronic and thermal Free Energies= -5418.572745

|                | 1       | 2       | 3       |
|----------------|---------|---------|---------|
|                | A       | A       | A       |
| Frequencies -- | 15.0458 | 35.4023 | 39.9606 |

**Intrinsic reaction coordinate (IRC) plots**  
**DPPP-Rh-Ph-syn-O=C=O-TS1 (6)**

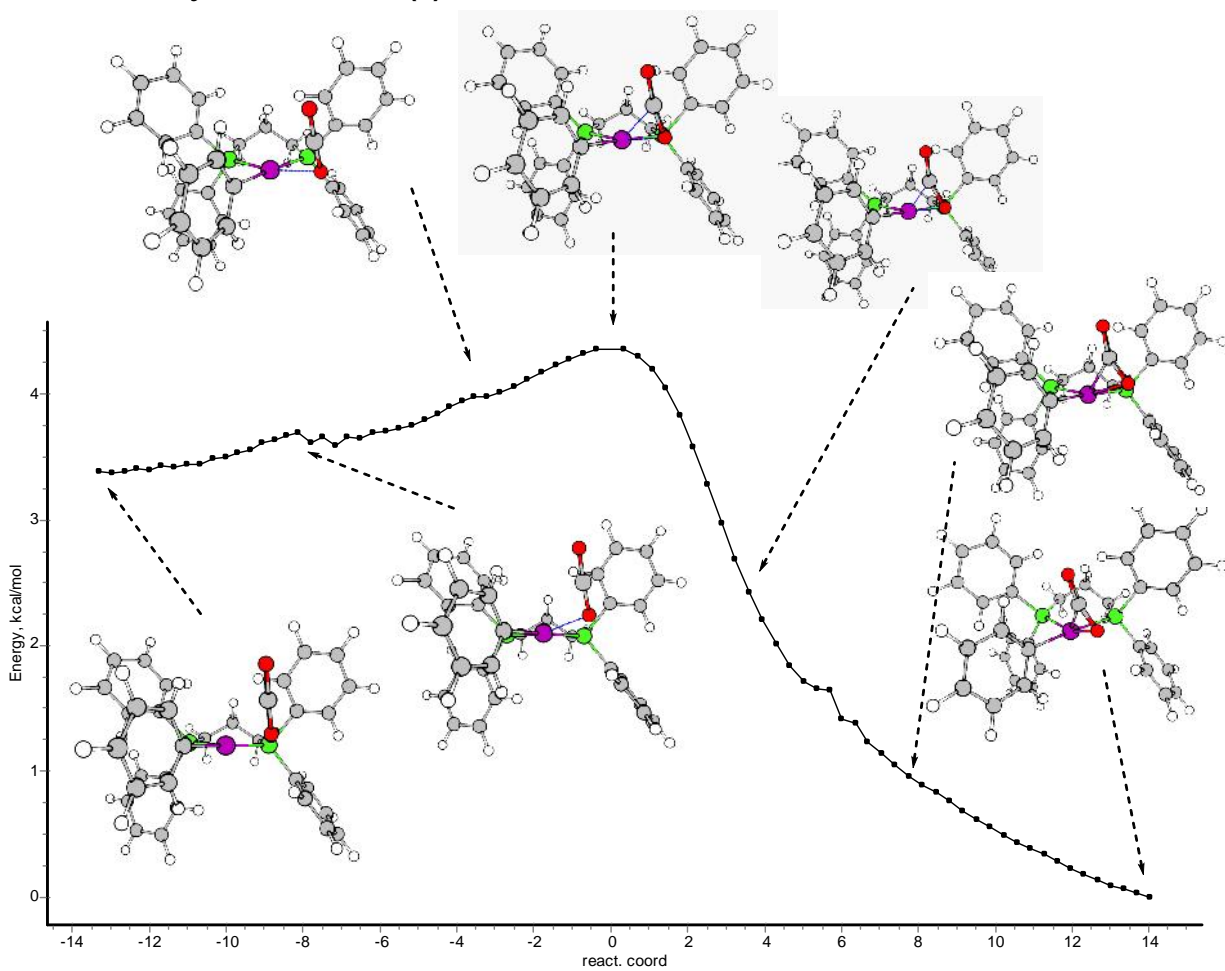

# DPPP-Rh-Ph-syn-CO<sub>2</sub>-TS2 (8)

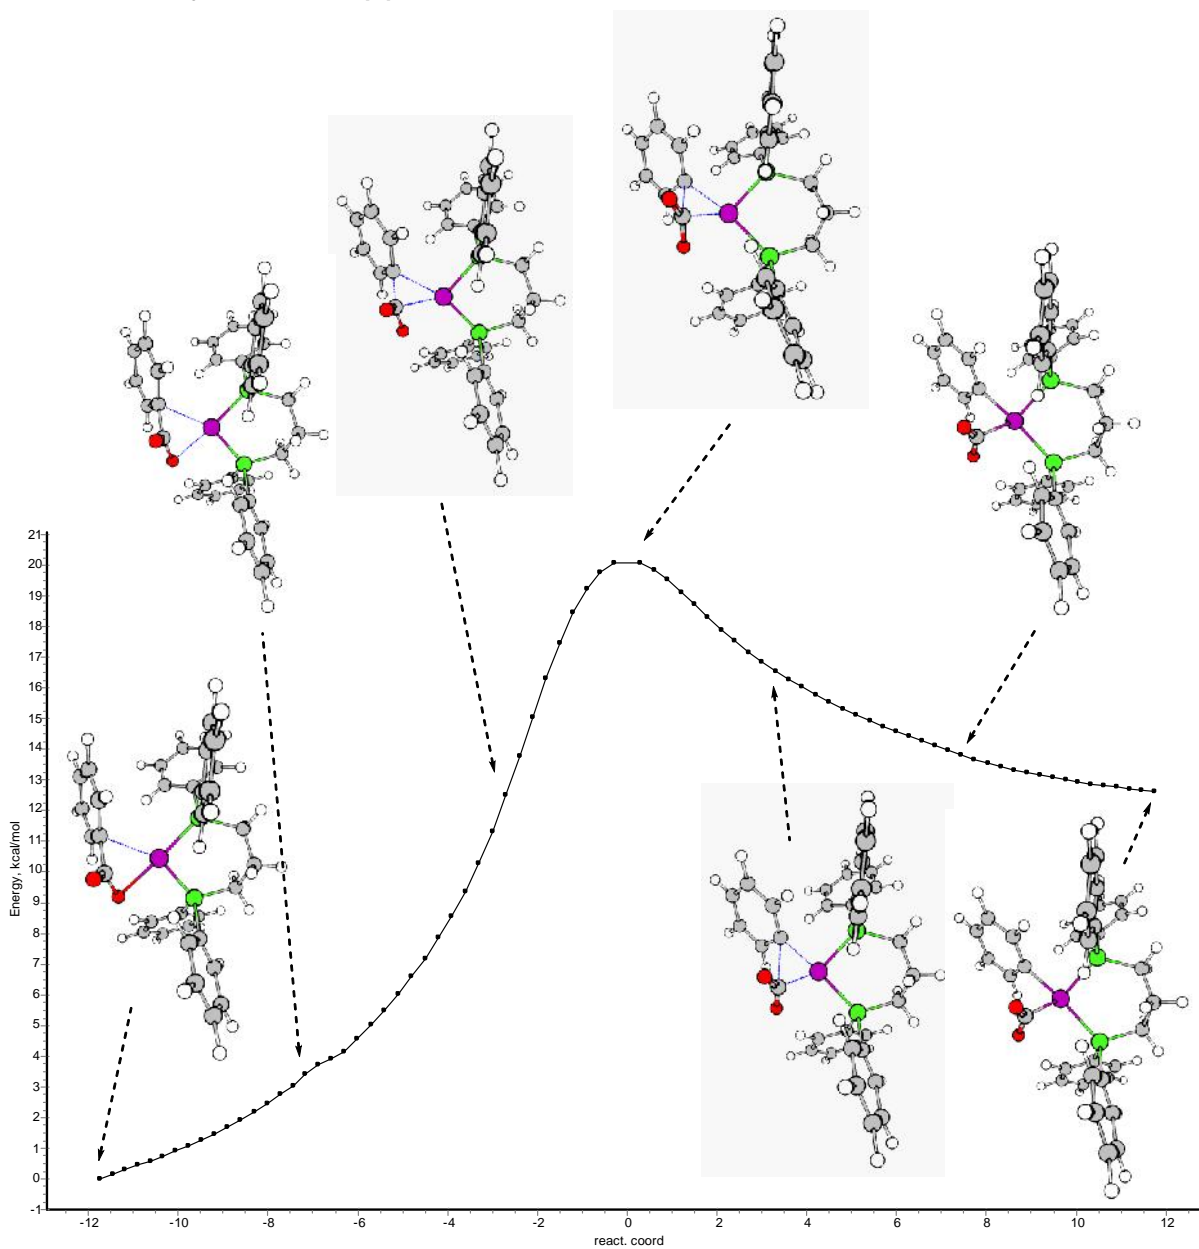

### DPPP-Rh-Ph-*anti*-CO<sub>2</sub>-TS2 (13)

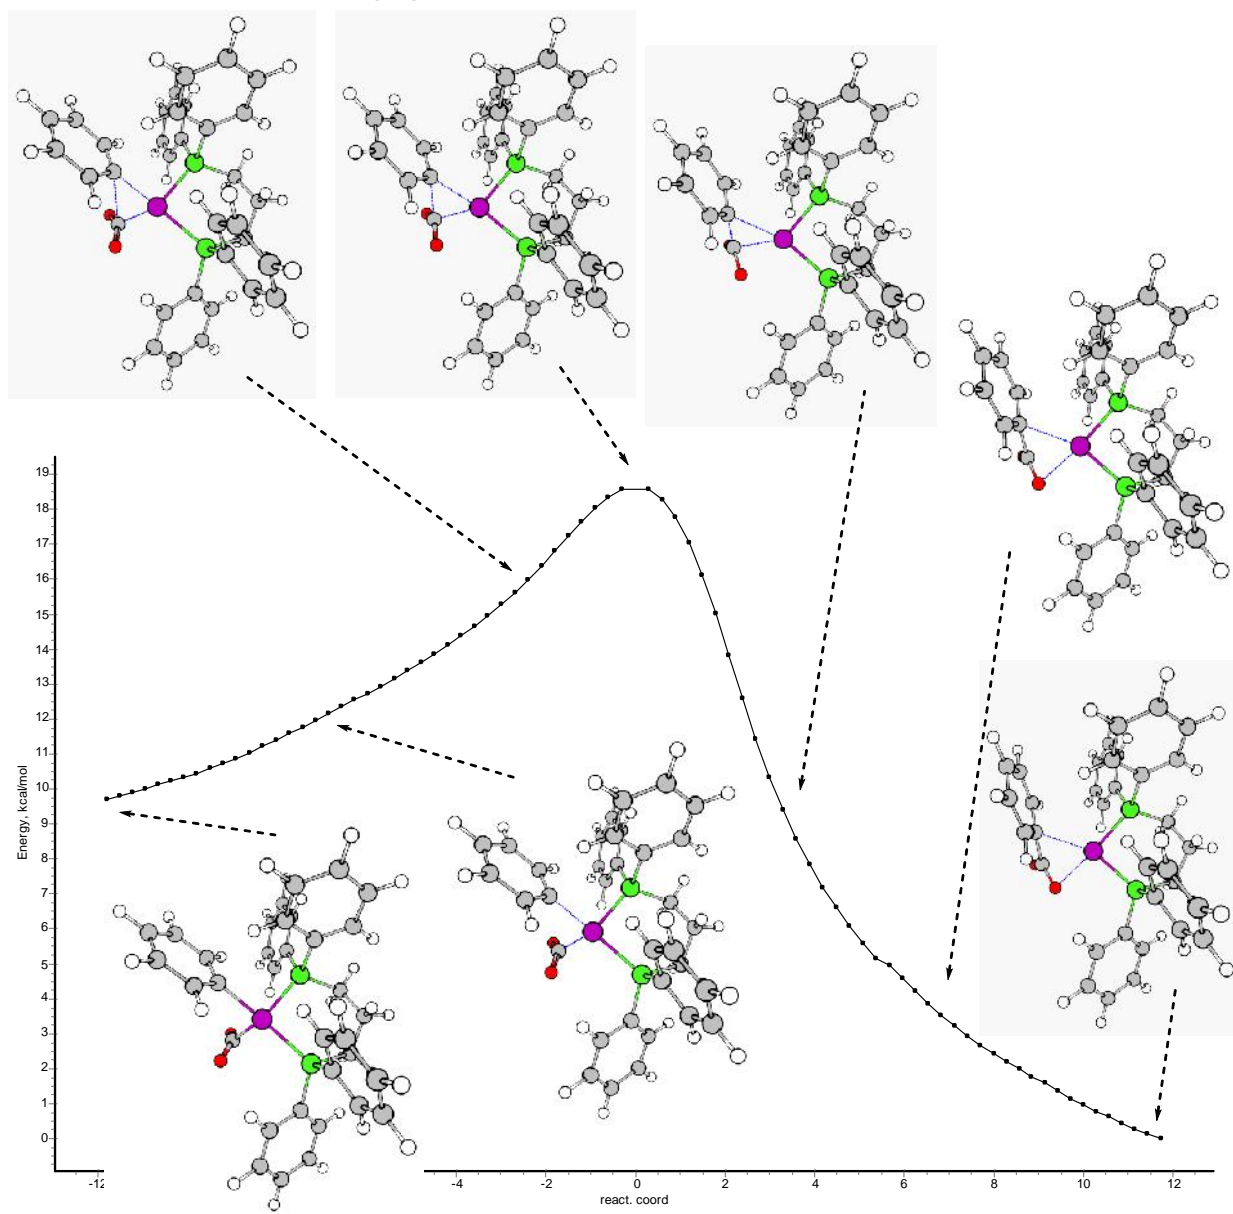

COD-Rh-Ph-O=C=O-TS1 (18)

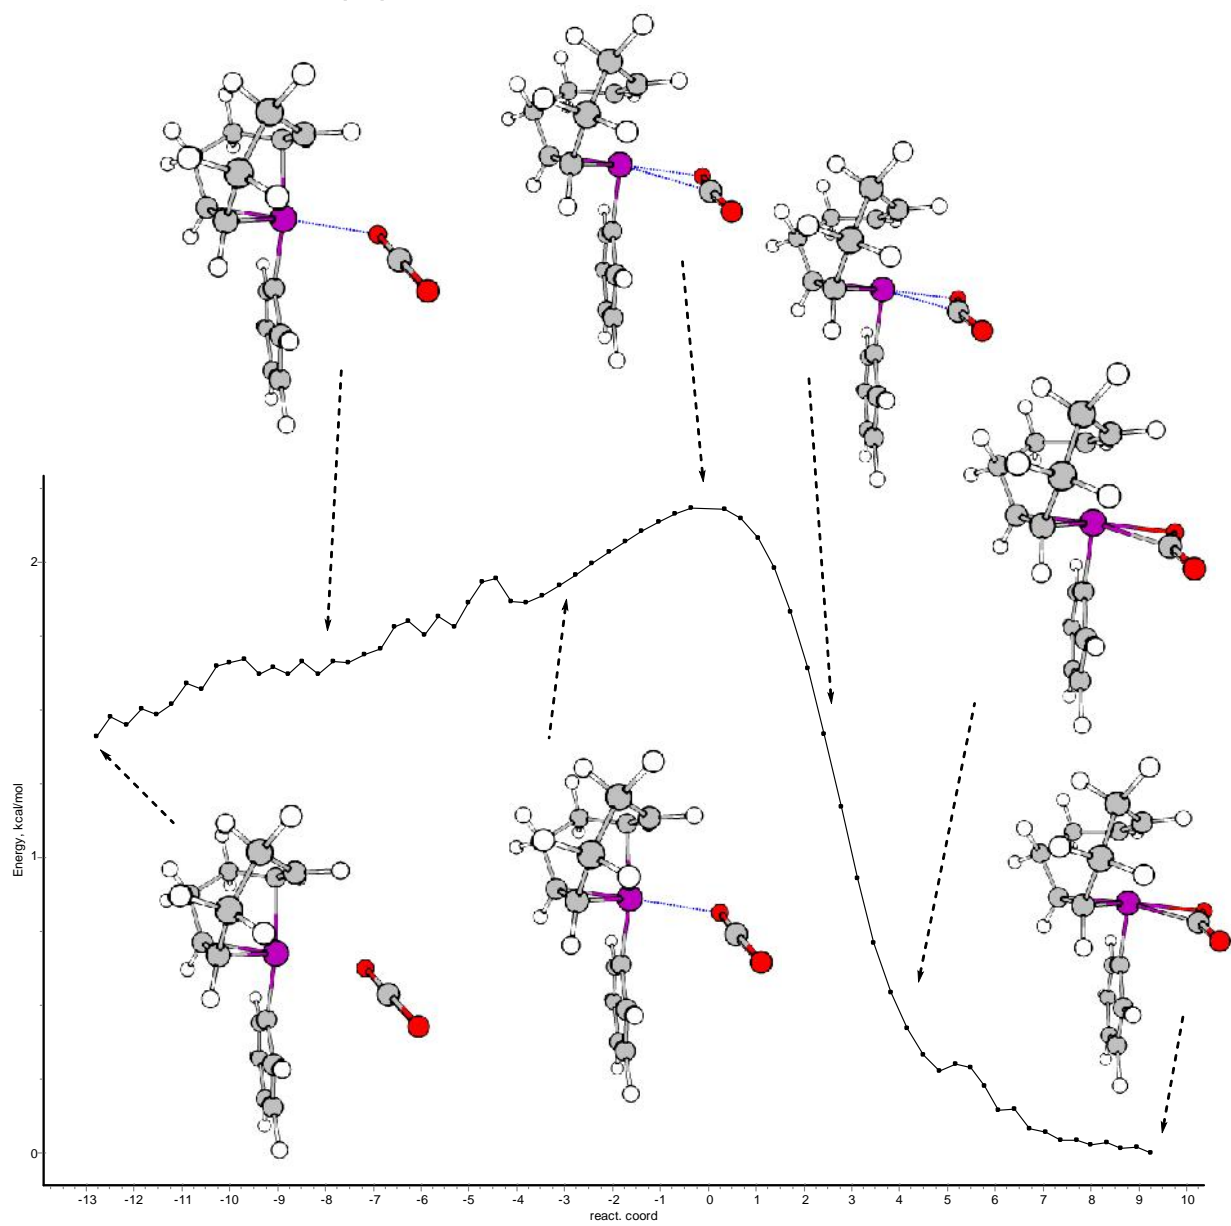



# COD-Rh-Ph-CO<sub>2</sub>-TS2 (20)

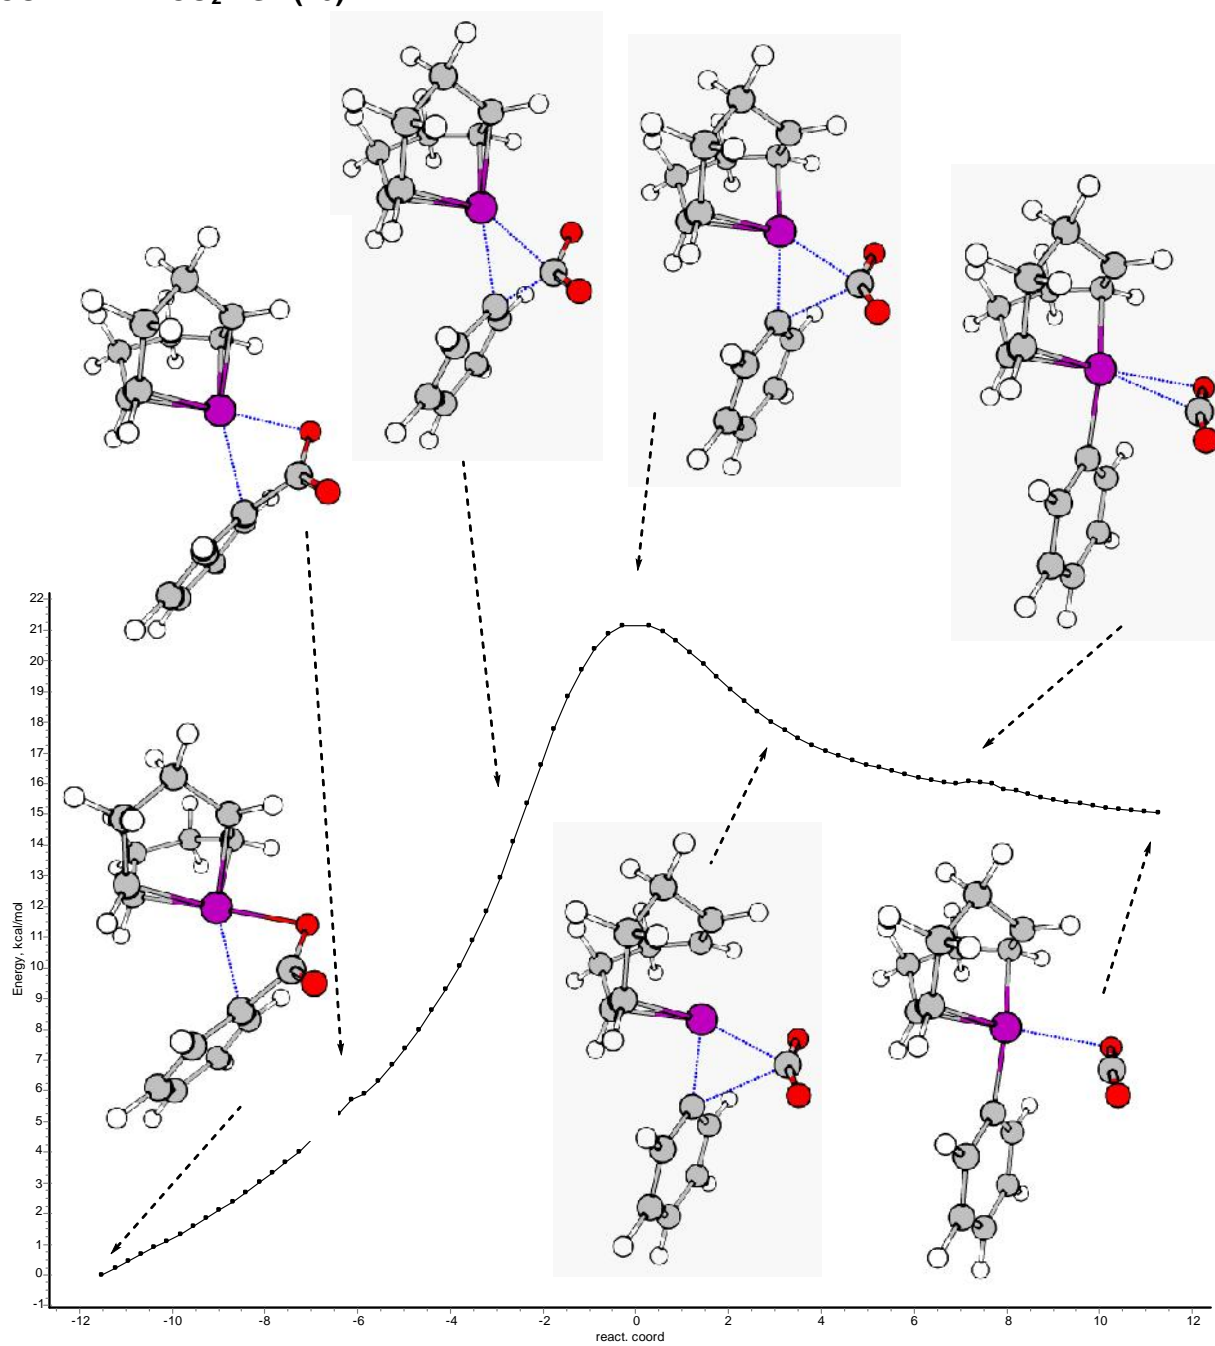

Supplement: c4gc00243a1.pdf [file c4gc00243a1.pdf]
